# Supplementary material for: Mechanistic study on C(sp2)–F bond activation by a Ni0(silyl)-ate complex: an outer-sphere pathway via Ni0-mediated nucleophilic aromatic substitution
Source: Royal Society of Chemistry journal article supplement (doi:10.1039/d4qo00743c), 2024-01-01
Supplement: d4qo00743c1.pdf [file d4qo00743c1.pdf]

## Supporting Information

### Mechanistic study on C(sp<sup>2</sup>)-F bond activation by Ni<sup>0</sup>(silyl)-ate complex: an outer-sphere pathway via Ni<sup>0</sup>-mediated nucleophilic aromatic substitution

Xiao-Xia You<sup>a</sup>, Jian-Sen Wang<sup>a</sup>, Xiao-Xiao Li<sup>a</sup>, Ling-Qi Meng<sup>c</sup>, Rong-Lin Zhong<sup>a,\*</sup>,  
Zhong-Min Su<sup>a, b, c\*</sup>

<sup>a</sup> Laboratory of Theoretical and Computational Chemistry, Institute of Theoretical  
Chemistry, College of Chemistry, Jilin University, Changchun, 130021, P. R. China.  
[zhongrl898@jlu.edu.cn](mailto:zhongrl898@jlu.edu.cn), [suzhongmin@jlu.edu.cn](mailto:suzhongmin@jlu.edu.cn)

<sup>b</sup> State Key Laboratory of Supramolecular Structure and Materials, Institute of  
Theoretical Chemistry, College of Chemistry, Jilin University, Changchun 130021,  
China

<sup>c</sup> School of Chemistry and Environmental Engineering, Changchun University of  
Science and Technology, Changchun 130012, China

## Content

|                                                                                                         |    |
|---------------------------------------------------------------------------------------------------------|----|
| 1. Benchmark calculations of functionals for geometry optimization .....                                | 2  |
| 2. Plausible reactions and reaction energy .....                                                        | 4  |
| 3. NBO charge changes along the IRC .....                                                               | 9  |
| 4. Full cycle of C(sp <sup>3</sup> )-F silylation catalyzed by Ni <sup>0</sup> (silyl)-ate complex..... | 14 |
| 5. AIMD simulations of C(sp <sup>3</sup> )-F activation .....                                           | 15 |
| 6. References .....                                                                                     | 16 |
| 7. Cartesian coordinates .....                                                                          | 17 |

## 1. Benchmark calculations of functionals for geometry optimization

The crystal structure of a Ni<sup>0</sup> complex<sup>1</sup> is shown in Figure S1. Several functionals (See Table S1) have been tested for geometry optimization compared with the experimental results. The Ni–C1, Ni–C2, Ni–C3, Ni–C4, Ni–Si, and Ni–P distances were considered as parameters. As shown in Table S1, the RMSE of B3PW91-D3(BJ) and  $\omega$ B97XD functional is almost the same, the MAE of B3PW91-D3(BJ) is the minimum. In this work, all geometry optimizations were performed by B3PW91-D3(BJ) functional because dispersion correction should be considered and the optimization by B3PW91-D3(BJ) functional reproduced other crystal structures well<sup>2</sup>, in which the Stuttgart-Dresden-Bonn basis sets were employed for valence electrons of Ni atom with corresponding effective core potentials representing their core electrons and 6-31G(d) basis sets were employed for other atoms.

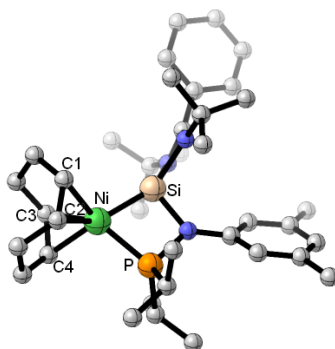

**Figure S1.** Crystal structure of Ni<sup>0</sup>(silylene) complex. (distance [Å], hydrogen atoms are omitted for clarity).

**Table S1.** Benchmark of functionals for geometry optimization. Angstrom unit was used. Basis set: SDD for Ni, 6-31G(d) basis sets for other atoms.

|                         | $R_{\text{Ni-C1}}$ | $R_{\text{Ni-C2}}$ | $R_{\text{Ni-C3}}$ | $R_{\text{Ni-C4}}$ | $R_{\text{Ni-Si}}$ | $R_{\text{Ni-P}}$ | RMSE  | MAE   |
|-------------------------|--------------------|--------------------|--------------------|--------------------|--------------------|-------------------|-------|-------|
| Experiment <sup>1</sup> | 2.067              | 2.104              | 2.076              | 2.072              | 2.187              | 2.183             |       |       |
| B3LYP                   | 2.123              | 2.161              | 2.132              | 2.108              | 2.215              | 2.235             | 0.049 | 0.048 |
| B3LYP-D3(BJ)            | 2.104              | 2.142              | 2.109              | 2.081              | 2.183              | 2.195             | 0.026 | 0.022 |
| B3PW91                  | 2.088              | 2.120              | 2.103              | 2.082              | 2.199              | 2.207             | 0.019 | 0.018 |
| B3PW91-D3(BJ)           | 2.067              | 2.099              | 2.081              | 2.057              | 2.161              | 2.169             | 0.014 | 0.011 |
| M06                     | 2.092              | 2.128              | 2.097              | 2.074              | 2.205              | 2.211             | 0.021 | 0.020 |
| M062X                   | 2.591              | 2.717              | 2.030              | 2.009              | 2.286              | 2.284             | 0.336 | 0.241 |
| $\omega$ B97XD          | 2.090              | 2.120              | 2.090              | 2.066              | 2.189              | 2.194             | 0.014 | 0.012 |

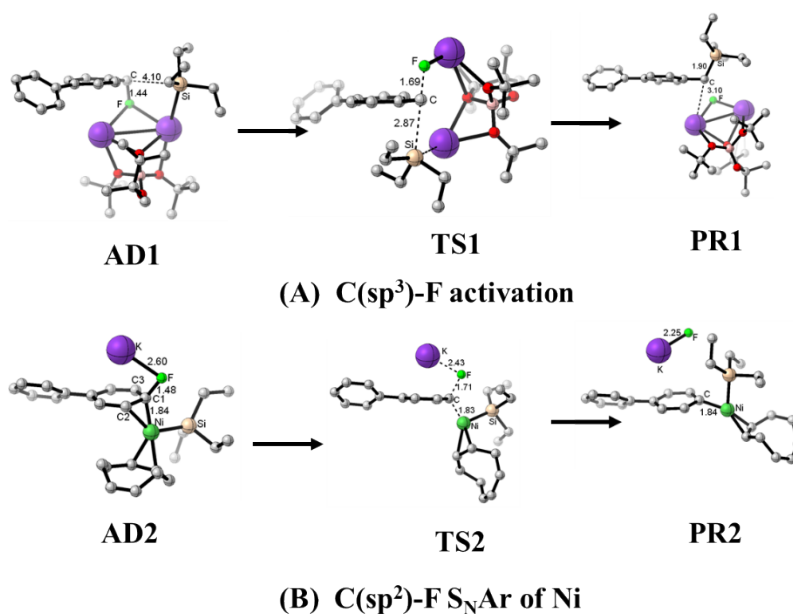

**Figure S2.** Important structures in the activation of C(sp<sup>3</sup>)-F and the activation of C(sp<sup>2</sup>)-F with the K<sup>+</sup>[Ni<sup>0</sup>(cod)<sub>2</sub>(SiEt<sub>3</sub>)]<sup>-</sup>.

**Table S2.** Benchmark of functionals for potential energy change at B3PW91-D3(BJ)/BSII level.

|                | $E_{a1}^a$ | $\Delta E_{b1}^b$ | $E_{c2}^c$ | $\Delta E_{d2}^d$ | RMSE | MAE |
|----------------|------------|-------------------|------------|-------------------|------|-----|
| B3LYP          | 16.5       | -94.8             | 1.8        | -26.2             | 2.5  | 2.1 |
| B3LYP-D3(BJ)   | 10.0       | -89.2             | 0.4        | -29.2             | 6.6  | 6.1 |
| B3PW91-D3(BJ)  | 9.4        | -87.9             | 4.3        | -27.8             | 6.5  | 5.4 |
| M06            | 12.4       | -89.5             | 6.1        | -26.8             | 4.7  | 3.7 |
| $\omega$ B97XD | 16.3       | -95.8             | 5.8        | -29.0             | 2.4  | 1.8 |
| DLPNO-CCSD(T)  | 19.5       | -95.5             | 5.7        | -25.4             |      |     |

<sup>a</sup>  $E_{a1}$  is the activation energy of nucleophilic substitution, which is the potential energy difference between TS1 and AD1;

<sup>b</sup>  $\Delta E_{b1}$  is the reaction energy, which is the potential energy difference between PR1 and TS1;

<sup>c</sup>  $E_{a2}$  is the activation energy, which is the potential energy difference between TS2 and AD2;

<sup>d</sup>  $\Delta E_{d2}$  is the reaction energy, which is the potential energy difference between PR2 and TS2.

## 2. Plausible reactions and reaction energy

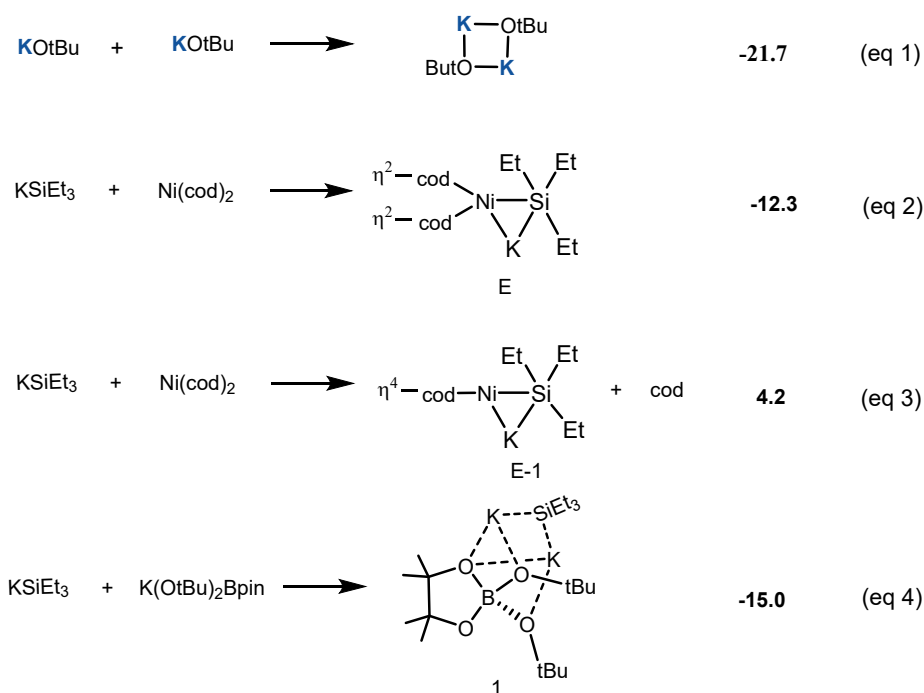

**Scheme S1.** Plausible conversion of substrates, base, and catalysts. The number on the right-hand side represents the Gibbs energy of reaction ( $\Delta G^\circ$  in kcal mol<sup>-1</sup>).

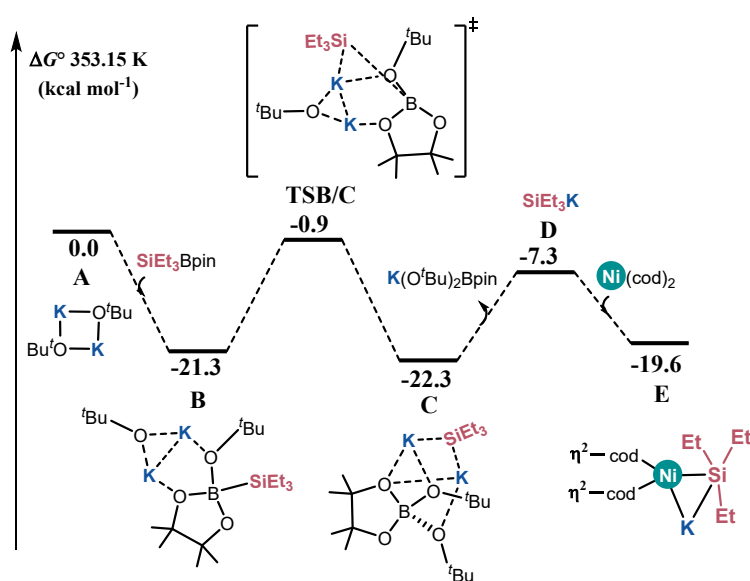

**Figure S3.** Gibbs energy profile for the generation of plausible reaction active species.

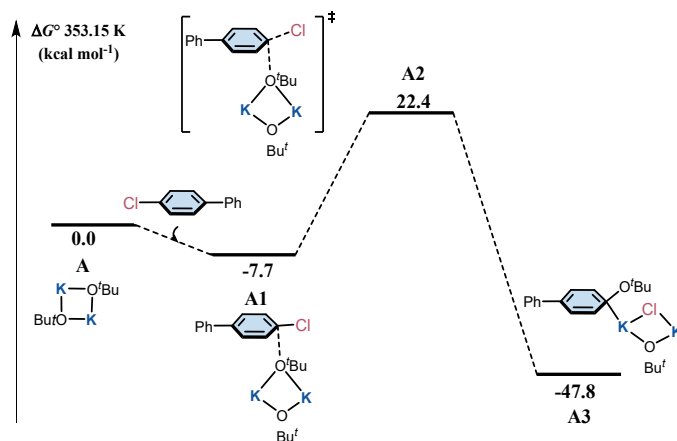

**Figure S4.** Gibbs energy profile of C(sp<sup>2</sup>)-Cl catalyzed by the A complex.

The Gibbs free energy profile of C(sp<sup>2</sup>)-Cl catalyzed by the A complex is shown in Figure S4. The  $\Delta G^{\ddagger}$  is 30.1 kcal mol<sup>-1</sup>, which is higher than that to C(sp<sup>2</sup>)-Cl borylation. It indicates that the tertiary butanol oxygen activate is not effective for the activation of C(sp<sup>2</sup>)-Cl because such  $\Delta G^{\ddagger}$  is difficult to be overcome by the experimental temperature.

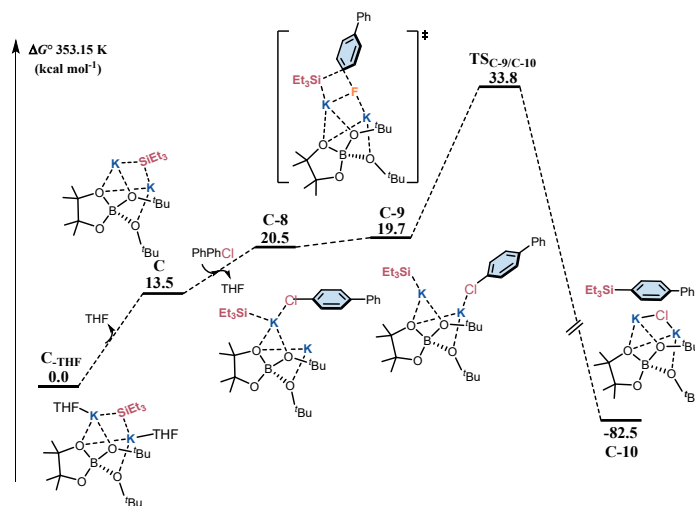

**Figure S5.** Gibbs energy profile in the full catalytic cycle of C(sp<sup>2</sup>)-Cl silylation catalyzed by the C complex.

During the process where the silyl anion conducts a nucleophilic attack on the substituted carbon atom of the phenyl ring, it leads to the formation of a silyl

substitution product with  $\Delta G^{\ddagger}$  of 33.8 kcal mol<sup>-1</sup> relative to C<sub>-THF</sub> indicating that the activation of C(sp<sup>2</sup>)-Cl bond is not activated by SiEt<sub>3</sub> as a nucleophilic reagent, as shown in Figure S5.

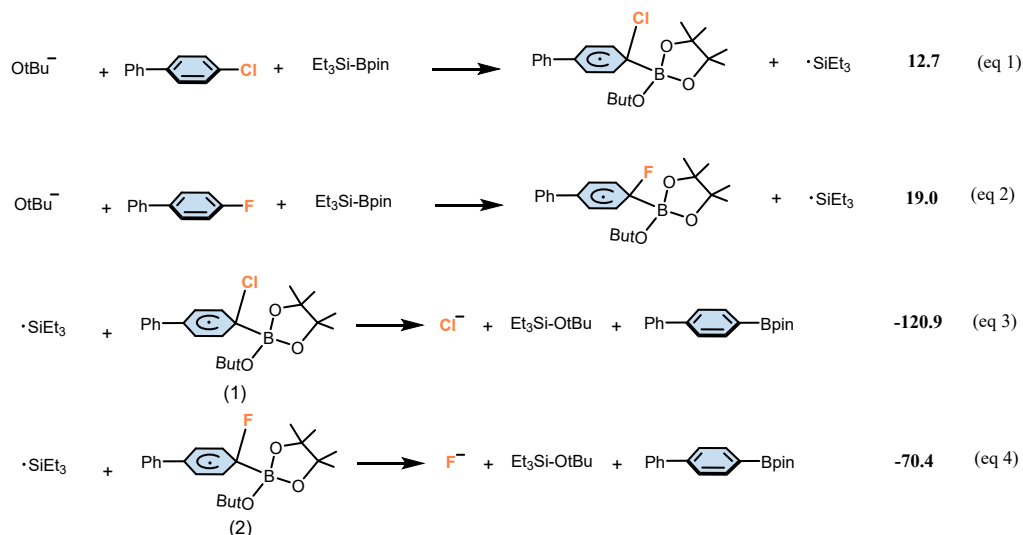

**Scheme S2.** Plausible Conversion of Substrates, Base, and Catalysts.

The weaker but less polar C(sp<sup>2</sup>)-Cl bond activation likely occurs through a homolytic manner (radical pathway) since KO<sup>t</sup>Bu is also widely used as an initiator to facilitate the generation of a  $\cdot\text{Bpin}$  radical from Et<sub>3</sub>SiBpin, which activates the C(sp<sup>2</sup>)-X (X=Cl, Br, and I) bond leading to borylated products.<sup>3</sup> The activation of the C(sp<sup>2</sup>)-Cl bond is relatively straightforward due to its low bond energy. In this study, we evaluated the energy change of the single-electron transfer (SET) process, initiated by the additional amount of KO<sup>t</sup>Bu as a trigger. Results show that the <sup>t</sup>O<sup>-</sup>Bu anion could also react with Et<sub>3</sub>SiBpin, generating a triethylsilyl radical  $\cdot\text{SiEt}_3$  with  $\Delta G^\circ$  of 12.7 kcal mol<sup>-1</sup> as shown in Scheme S2. The C(sp<sup>2</sup>)-Cl bond is thus activated by the attack of  $\cdot\text{Bpin}$  radical to form a radical complex, in which the single electron is distributed in the phenyl ring and chlorine. The subsequent single electron transfer from the aryl group to the chlorine proceeds rapidly. However,  $\Delta G^\circ$  of C(sp<sup>2</sup>)-F bond activated with the attack of  $\cdot\text{Bpin}$  radical is somewhat larger (19.0 kcal mol<sup>-1</sup>), suggesting this SET process is slower than that of C(sp<sup>2</sup>)-Cl bond activation. Importantly, the single electron is predominantly located in the phenyl ring, indicating that the generation of fluorine radical via a homolytic C(sp<sup>2</sup>)-F bond activation is unlikely. Correspondingly,

the subsequent single electron transfer from the aryl group to the fluorine become markedly slower than the C(sp<sup>2</sup>)-Cl. These results indicate that the low SET rate in the radical complex involving the ·Bpin and fluoride arenes plays a critical factor that borylation of C(sp<sup>2</sup>)-F bond did not occur via a radical pathway. However, C(sp<sup>2</sup>)-Cl bond activation also via a unique carbanion-mediated mechanism involving the halogenophilic attack of a silyl nucleophile.<sup>4</sup> The detailed discussion of reactions is provided in the Figure S6.

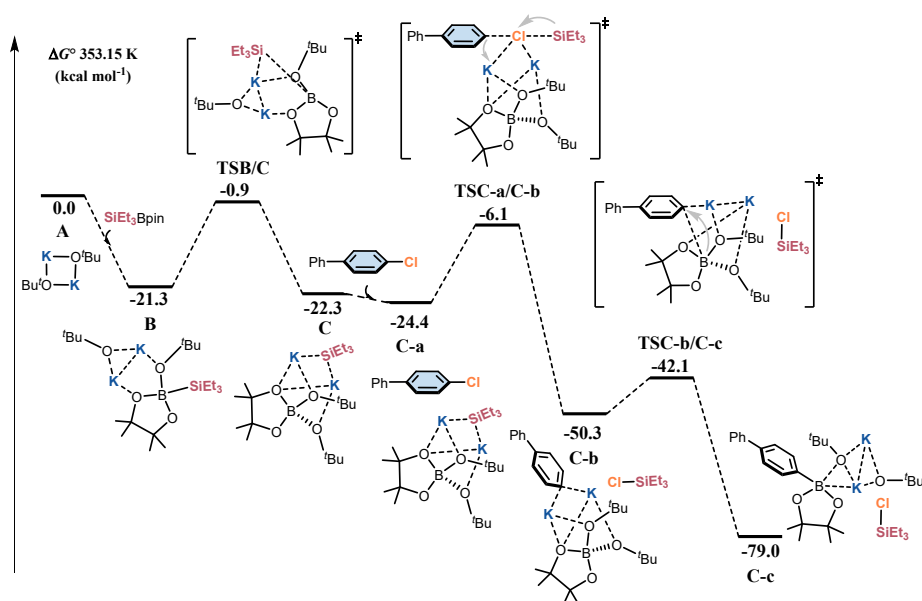

**Figure S6.** Gibbs energy profile in the full catalytic cycle of C(sp<sup>2</sup>)-Cl borylation catalyzed by the C complex.

The most stable complex **C** combine with Ar-Cl to generate **C-a**, which rapidly consumed by the subsequent halogenophilic attack process, which proceeded via **TSC-a/C-b** with a very low energy barrier of 18.1 kcal/mol. Furthermore, significant cation- $\pi$  interactions existed between the potassium cation and the phenyl group of the PhCH<sub>2</sub>CH<sub>2</sub> moiety in the metastable intermediate **C-b**<sup>5</sup>, which proceeds directly to the borylation reaction through **TSC-b/C-c**.



### 3. NBO charge changes along the IRC

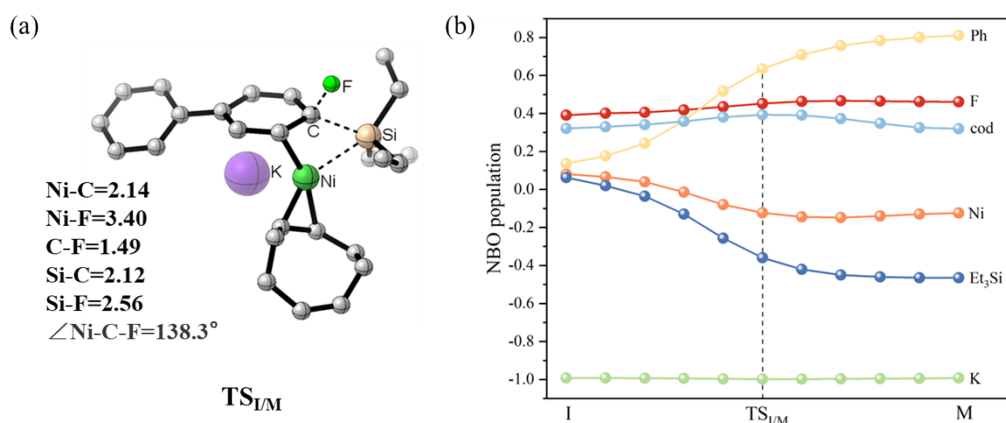

**Figure S7.** Main structure parameters in  $TS_{I/M}$ . (a) Main geometric parameters in  $TS_{I/M}$ . (b) NBO population of F, Ph, Et<sub>3</sub>Si, cod, and Ni moieties changes along the IRC for  $TS_{I/M}$ .

We examined the geometric parameters of  $TS_{I/M}$  to elucidate the characteristic feature, as shown in Figure S7(a). In  $TS_{I/M}$ , the Ni-F bond length (3.40 Å) is considerably longer compared to  $TS_{I/L}$  (2.06 Å), and the Ni-C (2.14 Å) is longer compared to  $TS_{I/L}$  (1.92 Å), while the C-F (1.56-1.71 Å) bond length are similar in both transition states. Additionally, the Ni-C-F angle (138.3°) in  $TS_{I/M}$  is notably greater than in  $TS_{I/L}$  (71.5°). The activation of the C(sp<sup>2</sup>)-F bond in  $TS_{I/L}$  involves a homolytic mechanism characterized by a concerted oxidative addition, featuring a shorter Ni-F bond and a smaller Ni-C-F angle. Conversely,  $TS_{I/M}$  resembles a transition state typical of the S<sub>N</sub>Ar reaction, where the elongated Ni-F bond and increased Ni-C-F angle indicate a nucleophilic reaction process with SiEt<sub>3</sub> attacking and F anion departing from the bene-ring, leading to heterolytic C(sp<sup>2</sup>)-F bond activation.

To analysis the electronic structure changes through the two transition states, we examined the variations in electron population along the IRC. During the I→ $TS_{I/M}$ →M transition, the electron population of F group increased from 0.45 e to 0.74 e and that of the Ph group increases from -0.02 e to 0.33 e. Correspondingly, the electron

population of the Ni atom decreased from 0.09 e to -0.10 e, and for Et<sub>3</sub>Si, it reduced from 0.26 e to 0.06e. Note that in the equilibrium structure of PhF, the Natural Bond Orbital (NBO) population of F atom is 0.33 e greater than that of an isolated F atom.<sup>6</sup> This observation implies that Si attack on the benzene ring occurs through a S<sub>N</sub>Ar mechanism.

**Table S3.** NBO population change along IRC of TS<sub>I/L</sub> and TS<sub>H/J</sub>.

| Group              | TS <sub>I/L</sub>  |                            | TS <sub>H/J</sub>  |                            |
|--------------------|--------------------|----------------------------|--------------------|----------------------------|
|                    | Charge transfer(e) | Total electronic change(e) | Charge transfer(e) | Total electronic change(e) |
| F                  | 0.36 to 0.64       | 0.28                       | 0.33 to 0.88       | 0.55                       |
| Ph                 | -0.05 to 0.45      | 0.50                       | 0.48 to 0.41       | 0.07                       |
| Et <sub>3</sub> Si | 0.35 to 0.19       | 0.16                       | 0.24 to -0.18      | 0.42                       |
| cod                | 0.18 to -0.05      | 0.23                       | 0.01 to 0.03       | 0.02                       |
| Ni                 | 0.14 to -0.25      | 0.39                       | -0.10 to -0.19     | 0.09                       |
| K                  | -0.97 to -0.97     | 0.00                       | -0.97 to -0.95     | 0.02                       |

**Table S4.** NBO population change along IRC of TS<sub>G/J</sub> and TS<sub>I/M</sub>.

| Group              | TS <sub>G/J</sub>  |                            | TS <sub>I/M</sub>  |                            |
|--------------------|--------------------|----------------------------|--------------------|----------------------------|
|                    | Charge transfer(e) | Total electronic change(e) | Charge transfer(e) | Total electronic change(e) |
| F                  | 0.45 to 0.74       | 0.29                       | 0.45 to 0.74       | 0.29                       |
| Ph                 | -0.02 to 0.33      | 0.35                       | -0.02 to 0.33      | 0.35                       |
| Et <sub>3</sub> Si | 0.26 to 0.06       | 0.20                       | 0.26 to 0.06       | 0.20                       |
| cod                | 0.20 to -0.05      | 0.25                       | 0.20 to -0.05      | 0.25                       |
| Ni                 | 0.09 to -0.10      | 0.19                       | 0.09 to -0.10      | 0.19                       |
| K                  | -0.97 to -0.99     | 0.02                       | -0.97 to -0.99     | 0.02                       |

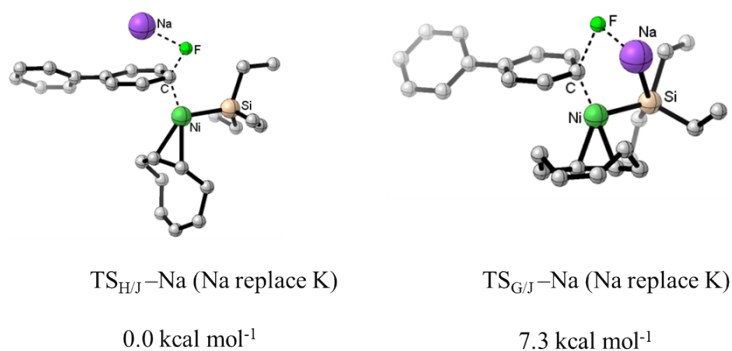

**Figure S8.** The  $\Delta G$  of  $\text{TS}_{\text{G/J}}\text{-Na}$  (inner-sphere) and  $\text{TS}_{\text{H/J}}\text{-Na}$  (outer-sphere) transition state of  $\text{C}(\text{sp}^2)\text{-F}$  silylation where Na replaces K in the transition state.

To confirm radius effect, we conducted models with Na, and the results indicate that for smaller alkali metal ions, the inner-sphere transition state is more stable (7.3 kcal mol<sup>-1</sup>) than the outer-sphere transition state.

**Table S5.** Orbital composition of the Ni–Si bond through NBO analysis in E, I,  $\text{TS}_{\text{I/L}}$ ,

L, G, TS<sub>G/J</sub>, H, TS<sub>H/J</sub> and J

| Type           | Intermediate      | Occupancy                                                                     | Ni–Si orbital                                                                         |
|----------------|-------------------|-------------------------------------------------------------------------------|---------------------------------------------------------------------------------------|
| Active species | E                 | Ni (s (39.08%) p (58.82%) d (2.09%))<br>Si (s (33.66%) p (66.27%) d (0.07%))  | 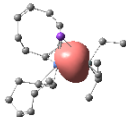   |
| Concerted OA   | I                 | Ni (s (52.85%) p (45.48%) d (1.66%))<br>Si (s (33.51%) p (66.42%) d (0.07%))  |    |
|                | TS <sub>I/L</sub> | Ni (s (46.89%) p (22.56%) d (30.55%))<br>Si (s (28.34%) p (71.52%) d (0.14%)) |    |
|                | L                 | Ni (s (39.56%) p (23.34%) d (37.08%))<br>Si (s (33.85%) p (66.05%) d (0.10%)) |    |
| Inner-sphere   | G                 | Ni (s (47.11%) p (50.96%) d (1.92%))<br>Si (s (32.93%) p (67.00%) d (0.07%))  |  |
|                | TS <sub>G/J</sub> | Ni (s (40.21%) p (27.18%) d (32.60%))<br>Si (s (28.43%) p (71.40%) d (0.16%)) |  |
| Outer-sphere   | H                 | Ni (s (42.81%) p (23.61%) d (33.56%))<br>Si (s (27.32%) p (72.49%) d (0.19%)) |  |
|                | TS <sub>H/J</sub> | Ni (s (53.68%) p (11.99%) d (34.31%))<br>Si (s (24.37%) p (75.37%) d (0.25%)) |  |
|                | J                 | Ni (s (31.96%) p (23.80%) d (44.21%))<br>Si (s (5.03%) p (74.63%) d (0.34%))  |  |

**Table S6.** NBO information of intermediate **E**.

| Bond orbital | Atom/<br>Bond | Occupancy                                                                    | orbital                                                                               |
|--------------|---------------|------------------------------------------------------------------------------|---------------------------------------------------------------------------------------|
| BD           | Ni–Si         | Ni (s (39.08%) p (58.82%) d (2.09%))<br>Si (s (33.66%) p (66.27%) d (0.07%)) | 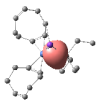   |
| LP           | Ni            | 1.99                                                                         |    |
| LP           | Ni            | 1.98                                                                         |    |
| LP           | Ni            | 1.97                                                                         |    |
| LP           | Ni            | 1.70                                                                         |   |
| LP           | Ni            | 1.59                                                                         |  |

**Table S7.** The charge of Ni and Si in the intermediate **E**, Ni(cod)<sub>2</sub> and **C**.

|                  |    | <b>E</b> | Ni(cod) <sub>2</sub> | <b>C</b> |
|------------------|----|----------|----------------------|----------|
| Hirshfeld charge | Ni | -0.20    | -0.08                | -        |
|                  | Si | 0.16     | -                    | -0.02    |
| NBO charge       | Ni | -0.31    | 0.02                 | -        |
|                  | Si | 1.12     | -                    | 0.44     |

#### 4. Full cycle of C(sp<sup>3</sup>)–F silylation catalyzed by Ni<sup>0</sup>(silyl)-ate complex.

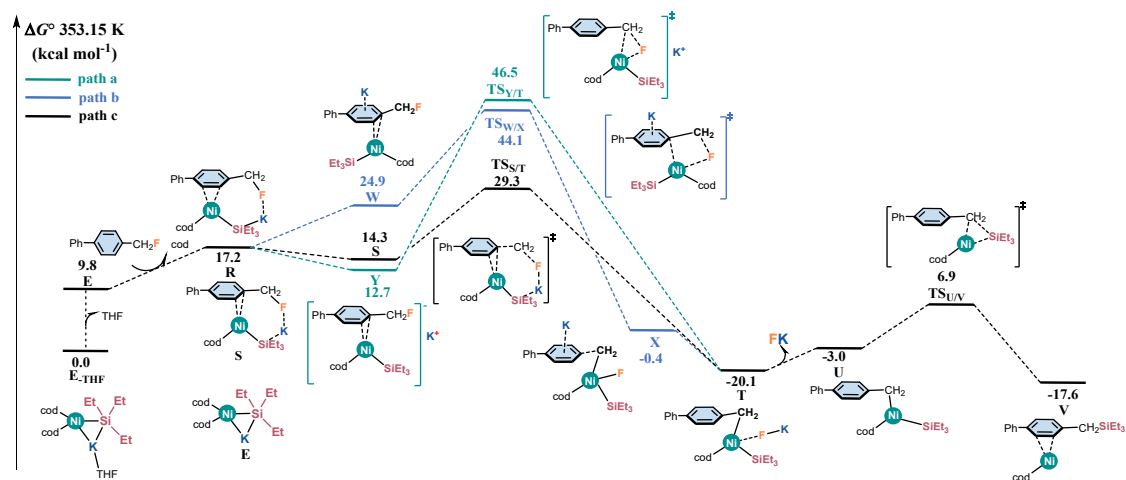

**Figure S9.** Gibbs energy profile in the full catalytic cycle of C(sp<sup>3</sup>)–F silylation catalyzed by the K<sup>+</sup>[Ni<sup>0</sup>(cod)<sub>2</sub>(SiEt<sub>3</sub>)]<sup>-</sup> complex.

The activation of C(sp<sup>3</sup>)–F bonds by the K<sup>+</sup>[Ni<sup>0</sup>(cod)<sub>2</sub>(SiEt<sub>3</sub>)]<sup>-</sup> complex potentially encompasses oxidative addition and nucleophilic substitution reactions, akin to those observed in C(sp<sup>2</sup>)–F silylation, the Gibbs energy profile with geometry changes for this process is shown in Figure S9. ArCH<sub>2</sub>F adds to **E**, forming the intermediate **R** with the free energy of 7.4 kcal mol<sup>-1</sup>. In the presence of free K<sup>+</sup>, intermediate **Y** is stabilized by 4.5 kcal mol<sup>-1</sup> due to the Ni coordination with the carbon-carbon double bond. However, **Y** then undergoes fast oxidative addition of the C(sp<sup>3</sup>)–F bond to Ni via a three-centered transition state, **TS<sub>Y/T</sub>**, with the energy barrier of 46.5 kcal mol<sup>-1</sup>, excluding this pathway. In pathway b and c, the internal nucleophilic aromatic substitution is assisted by K<sup>+</sup> complexation. Disruption of the FK interaction leads to K<sup>+</sup> interaction with the benzene ring and Ni coordinating to the carbon-carbon double bond, raising the energy of intermediate **W** by 7.7 kcal mol<sup>-1</sup>. The nucleophilic attack of Ni, as shown by the blue line in path b, activates the C(sp<sup>3</sup>)–F bond with an energy barrier of 44.1 kcal mol<sup>-1</sup>. However, when K<sup>+</sup> interacts with F, the Ni nucleophilic attack activates C(sp<sup>3</sup>)–F bond with the energy barrier is 29.3 kcal mol<sup>-1</sup>, which is much lower than that of both pathway a and b, as shown by the blue line in pathway c. In other

words, the energy barrier for C(sp<sup>3</sup>)–F bond activation in the presence of Ni<sup>0</sup>(cod)<sub>2</sub> is 29.3 kcal mol<sup>-1</sup>, which exceeds the energy barrier for C(sp<sup>3</sup>)–F activation in the absence of Ni<sup>0</sup>(cod)<sub>2</sub> (23.6 kcal mol<sup>-1</sup>). Therefore, it can be deduced that C(sp<sup>3</sup>)–F bond activation is feasible with or without the presence of Ni<sup>0</sup>(cod)<sub>2</sub>.

## 5. AIMD simulations of C(sp<sup>3</sup>)–F activation

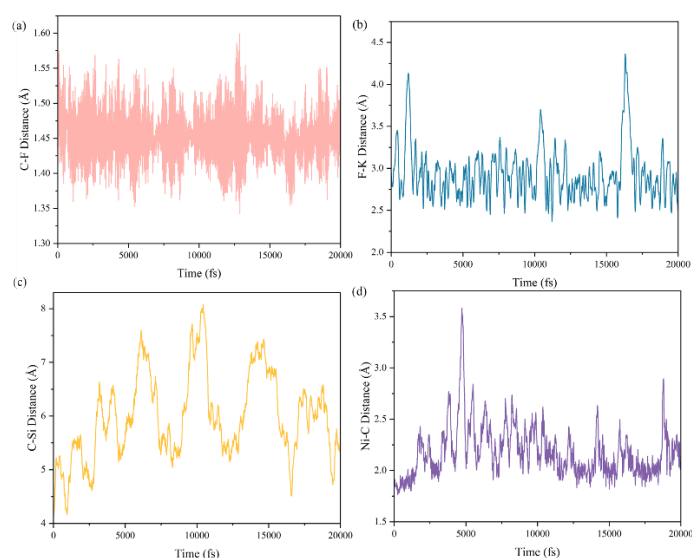

**Figure S10.** (a). The time-resolved evolution of C(sp<sup>3</sup>)–F bond distances with time of C(sp<sup>3</sup>)–F bond activation with Et<sub>3</sub>SiBpin and KO<sup>t</sup>Bu; (b). The time-resolved evolution of F–K bond distances with time of C(sp<sup>3</sup>)–F bond activation with Et<sub>3</sub>SiBpin and KO<sup>t</sup>Bu; (c). The time-resolved evolution of C–Si bond distances with time of C(sp<sup>3</sup>)–F bond activation with Et<sub>3</sub>SiBpin and KO<sup>t</sup>Bu; (d). The time-resolved evolution of Ni–C bond distances with time of outer-sphere Ni<sup>0</sup>-mediated C(sp<sup>2</sup>)–F bond activation.

To simulate dynamic effects of C(sp<sup>3</sup>)–F bond activation using Et<sub>3</sub>SiBpin and KO<sup>t</sup>Bu with multiple non-covalent interactions, we conducted AIMD simulations. Figure S10 (a) illustrates the temporal evolution of C(sp<sup>3</sup>)–F bond activation. The C(sp<sup>3</sup>)–F bond remains inactive when its distance fluctuates between 1.35 and 1.55 Å, because the equilibrium distance of the C(sp<sup>3</sup>)–F bond is 1.38 Å, which contradicts the results from DFT calculations. Notably, K<sup>+</sup>⋯F interactions persist during the reaction, while C⋯Si interactions disappear, as shown in Figure S10 (b) and (c). This disruption

of synergistic effects among weak interactions means that even if the energy barrier of the reaction can be overcome, the reaction itself cannot occur, emphasize the importance of not overlooking the equilibrium of non-covalent interactions in such reactions. In contrast to the outer-sphere Ni<sup>0</sup>-mediated C(sp<sup>2</sup>)-F bond activation reaction with similar energy barriers, the presence of Ni···C interactions and continuous synergistic effects enables the reaction to proceed.

## 6. References

- 1 M. Zhong, J. Wei, W.-X. Zhang, Z. Xi, Synthesis and Reactivity of Side-Arm Phosphine Functionalized Amidinosilylene- and Amidinatogermylene-Supported Nickel(0) Complexes, *Organometallics*, 2021, **40**, 310-313.
- 2 R. L. Zhong, S. Sakaki, Methane Borylation Catalyzed by Ru, Rh, and Ir Complexes in Comparison with Cyclohexane Borylation: Theoretical Understanding and Prediction, *J. Am. Chem. Soc.*, 2020, **142**, 16732-16747; R. L. Zhong, S. Sakaki, sp<sup>3</sup>C-H Borylation Catalyzed by Iridium(III) Triboryl Complex: Comprehensive Theoretical Study of Reactivity, Regioselectivity, and Prediction of Excellent Ligand, *J. Am. Chem. Soc.*, 2019, **141**, 9854-9866.
- 3 J. Zhou, B. Jiang, Y. Fujihira, Z. Zhao, T. Imai, N. Shibata, Catalyst-free carbosilylation of alkenes using silyl boronates and organic fluorides via selective C-F bond activation, *Nat. Commun.*, 2021, **12**, 3749.
- 4 R. Uematsu, E. Yamamoto, S. Maeda, H. Ito, T. Taketsugu, Reaction Mechanism of the Anomalous Formal Nucleophilic Borylation of Organic Halides with Silylborane: Combined Theoretical and Experimental Studies, *J. Am. Chem. Soc.*, 2015, **137**, 4090-4099.
- 5 R. Uematsu, E. Yamamoto, S. Maeda, H. Ito, T. Taketsugu, Reaction Mechanism of the Anomalous Formal Nucleophilic Borylation of Organic Halides with Silylborane: Combined Theoretical and Experimental Studies, *J. Am. Chem. Soc.*, 2015, **137**, 4090-4099.
- 6 J.-S. Wang, X.-X. You, R.-L. Zhong, Z.-M. Su, Heterolytic versus Homolytic: Theoretical Insight into the Ni<sup>0</sup>-Catalyzed Ph-F Bond Activation, *Organometallics*, 2023, **42**, 2771-2783.



## 7. Cartesian coordinates

98

C-2, E( $\omega$ B97XD /BSII)= -3206.38633 au

|   |           |           |           |    |           |           |           |
|---|-----------|-----------|-----------|----|-----------|-----------|-----------|
| F | -1.393674 | -1.007137 | 2.010817  | H  | 3.563638  | -0.332394 | -3.337636 |
| C | -2.773578 | -0.691714 | 1.941275  | H  | 1.935660  | -0.966330 | -3.045515 |
| H | -3.256855 | -1.477022 | 1.356633  | H  | 2.417551  | 0.612587  | -2.383662 |
| H | -3.138746 | -0.708012 | 2.973390  | C  | 3.620729  | -2.553076 | -1.709880 |
| C | -2.935328 | 0.649633  | 1.296991  | H  | 3.981783  | -3.108805 | -0.843976 |
| C | -3.541130 | 0.773152  | 0.042537  | H  | 2.729485  | -3.061818 | -2.094613 |
| C | -2.381667 | 1.789031  | 1.893635  | H  | 4.387821  | -2.587490 | -2.491153 |
| C | -3.571845 | 2.001638  | -0.612142 | B  | 2.697071  | -0.744292 | 0.984022  |
| H | -3.968221 | -0.101580 | -0.437552 | O  | 1.933612  | 0.514874  | 1.203867  |
| C | -2.394985 | 3.012468  | 1.230608  | C  | 2.004433  | 1.345499  | 2.354827  |
| H | -1.894344 | 1.707541  | 2.862107  | K  | 0.326557  | -2.839349 | 0.569620  |
| C | -2.976859 | 3.138161  | -0.042347 | C  | 3.448412  | 1.634553  | 2.772227  |
| H | -4.059373 | 2.077304  | -1.580124 | C  | 1.217131  | 0.722226  | 3.514011  |
| H | -1.913308 | 3.873212  | 1.686527  | C  | 1.344788  | 2.668084  | 1.944828  |
| C | -2.940312 | 4.424804  | -0.772289 | H  | 3.977689  | 0.717997  | 3.027342  |
| C | -3.119332 | 5.642685  | -0.100670 | H  | 3.992936  | 2.112706  | 1.953512  |
| C | -2.711164 | 4.451420  | -2.156286 | H  | 3.463916  | 2.302600  | 3.642085  |
| C | -3.069032 | 6.850145  | -0.791330 | H  | 1.147022  | 1.415209  | 4.361906  |
| H | -3.326531 | 5.640123  | 0.966476  | H  | 0.208418  | 0.461447  | 3.179114  |
| C | -2.659888 | 5.659099  | -2.846619 | H  | 1.695426  | -0.200623 | 3.844113  |
| H | -2.552682 | 3.518232  | -2.692082 | H  | 1.876888  | 3.106928  | 1.092203  |
| C | -2.837703 | 6.863250  | -2.166372 | H  | 0.298514  | 2.508217  | 1.659651  |
| H | -3.219186 | 7.783430  | -0.254896 | H  | 1.356222  | 3.393245  | 2.766743  |
| H | -2.474512 | 5.659400  | -3.917637 | O  | 2.314260  | -1.714014 | 2.023408  |
| H | -2.797868 | 7.806238  | -2.704976 | C  | 3.156142  | -2.614229 | 2.734356  |
| O | 4.128197  | -0.620864 | 0.798595  | C  | 2.219799  | -3.394078 | 3.665088  |
| O | 2.187919  | -1.169942 | -0.376843 | C  | 4.195924  | -1.871506 | 3.580441  |
| C | 4.394187  | -0.348025 | -0.563492 | C  | 3.880379  | -3.585278 | 1.796811  |
| C | 3.245735  | -1.117385 | -1.328600 | H  | 1.646272  | -2.700860 | 4.289335  |
| C | 4.345835  | 1.170921  | -0.787389 | H  | 1.507213  | -4.004132 | 3.091994  |
| H | 5.078568  | 1.637708  | -0.121498 | H  | 2.780580  | -4.073470 | 4.316439  |
| H | 4.593096  | 1.450138  | -1.817968 | H  | 4.801415  | -2.581822 | 4.156319  |
| H | 3.362373  | 1.567796  | -0.523946 | H  | 4.856042  | -1.292321 | 2.931517  |
| C | 5.799178  | -0.845683 | -0.890915 | H  | 3.704820  | -1.194184 | 4.286420  |
| H | 6.031282  | -0.713550 | -1.954327 | H  | 3.168557  | -4.121328 | 1.155596  |
| H | 6.530450  | -0.276044 | -0.307906 | H  | 4.571701  | -3.028717 | 1.161901  |
| H | 5.919242  | -1.901398 | -0.634922 | H  | 4.444622  | -4.332751 | 2.367007  |
| C | 2.761784  | -0.405513 | -2.593883 | K  | -0.023983 | 0.484982  | -0.605361 |
|   |           |           |           | Si | -1.958559 | -2.147285 | -1.800407 |
|   |           |           |           | C  | -3.621417 | -2.955873 | -1.172401 |
|   |           |           |           | C  | -2.558550 | -0.889485 | -3.170138 |
|   |           |           |           | C  | -1.311333 | -3.624769 | -2.899663 |
|   |           |           |           | H  | -4.155204 | -3.393716 | -2.029168 |
|   |           |           |           | H  | -4.304470 | -2.193864 | -0.764262 |

|                                               |           |           |           |   |           |           |           |
|-----------------------------------------------|-----------|-----------|-----------|---|-----------|-----------|-----------|
| C                                             | -3.406355 | -4.049625 | -0.120354 | O | 0.553403  | -1.201299 | 0.449122  |
| H                                             | -2.958662 | 0.010710  | -2.677383 | C | 0.984731  | -3.063500 | -0.914666 |
| H                                             | -1.655906 | -0.546354 | -3.703308 | C | -0.083604 | -1.956436 | -0.581935 |
| C                                             | -3.579426 | -1.398281 | -4.192682 | C | 2.007073  | -2.607514 | -1.966995 |
| H                                             | -1.046301 | -4.471532 | -2.245012 | H | 2.793099  | -3.366232 | -2.033157 |
| H                                             | -2.130054 | -3.999445 | -3.533844 | H | 1.561523  | -2.484908 | -2.960882 |
| C                                             | -0.107705 | -3.274336 | -3.776172 | H | 2.487803  | -1.674071 | -1.661117 |
| H                                             | -2.920718 | -3.654053 | 0.785643  | C | 0.380993  | -4.391928 | -1.357830 |
| H                                             | -4.342310 | -4.526218 | 0.204542  | H | -0.209373 | -4.274154 | -2.274232 |
| H                                             | -2.759864 | -4.848832 | -0.507426 | H | 1.183140  | -5.110442 | -1.556556 |
| H                                             | -4.516204 | -1.693486 | -3.704839 | H | -0.261003 | -4.814010 | -0.580991 |
| H                                             | -3.830648 | -0.643694 | -4.952767 | C | -0.422767 | -1.030043 | -1.752200 |
| H                                             | -3.202716 | -2.280279 | -4.724382 | H | -0.890035 | -1.588666 | -2.571015 |
| H                                             | 0.269521  | -4.130906 | -4.352726 | H | -1.133748 | -0.265244 | -1.418822 |
| H                                             | -0.357401 | -2.484765 | -4.496685 | H | 0.462821  | -0.533782 | -2.166602 |
| H                                             | 0.726550  | -2.895791 | -3.170292 | C | -1.403705 | -2.515427 | -0.046355 |
| 98                                            |           |           |           | H | -1.235508 | -3.215226 | 0.771206  |
| C-3, E( $\omega$ B97XD /BSII)= -3206.38169 au |           |           |           | H | -2.012510 | -1.687356 | 0.333225  |
| F                                             | 0.771809  | 2.378025  | 2.195314  | H | -1.978820 | -3.027425 | -0.825638 |
| C                                             | -0.136915 | 3.431006  | 1.838314  | B | 1.691249  | -2.008100 | 1.047811  |
| H                                             | -1.118277 | 3.127012  | 2.212317  | O | 2.850923  | -1.099340 | 0.766795  |
| H                                             | 0.223234  | 4.326311  | 2.352187  | C | 4.209503  | -1.306416 | 1.119439  |
| C                                             | -0.126547 | 3.565427  | 0.350644  | K | -0.459737 | -0.267047 | 2.776893  |
| C                                             | -1.022273 | 2.805282  | -0.411609 | C | 4.701422  | -2.685747 | 0.674166  |
| C                                             | 0.847793  | 4.327704  | -0.308627 | C | 4.418339  | -1.095327 | 2.622804  |
| C                                             | -0.925049 | 2.777965  | -1.798862 | C | 5.005080  | -0.237420 | 0.355494  |
| H                                             | -1.768478 | 2.201010  | 0.105379  | H | 4.130718  | -3.479950 | 1.152463  |
| C                                             | 0.956822  | 4.285165  | -1.697821 | H | 4.575445  | -2.797441 | -0.406933 |
| H                                             | 1.541029  | 4.936441  | 0.269451  | H | 5.761993  | -2.815077 | 0.921103  |
| C                                             | 0.086154  | 3.491305  | -2.466647 | H | 5.478481  | -1.178415 | 2.890818  |
| H                                             | -1.643074 | 2.195763  | -2.370011 | H | 4.063081  | -0.097901 | 2.909681  |
| H                                             | 1.744442  | 4.847658  | -2.193002 | H | 3.843504  | -1.823134 | 3.193511  |
| C                                             | 0.249321  | 3.380394  | -3.932937 | H | 4.837767  | -0.337523 | -0.724797 |
| C                                             | 0.597856  | 4.493240  | -4.711671 | H | 4.708947  | 0.772766  | 0.674763  |
| C                                             | 0.071241  | 2.143544  | -4.571808 | H | 6.080794  | -0.330639 | 0.540300  |
| C                                             | 0.765487  | 4.372409  | -6.088217 | O | 1.540885  | -2.159075 | 2.498917  |
| H                                             | 0.707936  | 5.465683  | -4.238271 | C | 1.347433  | -3.355353 | 3.251359  |
| C                                             | 0.241455  | 2.023209  | -5.947971 | C | 1.341689  | -2.911488 | 4.718665  |
| H                                             | -0.185415 | 1.266014  | -3.982691 | C | 2.480200  | -4.365353 | 3.036170  |
| C                                             | 0.590249  | 3.137010  | -6.711011 | C | 0.017051  | -4.035759 | 2.915233  |
| H                                             | 1.024389  | 5.248051  | -6.677649 | H | 2.264582  | -2.372046 | 4.956285  |
| H                                             | 0.105598  | 1.055816  | -6.424390 | H | 0.494195  | -2.244463 | 4.926943  |
| H                                             | 0.721407  | 3.043617  | -7.785659 | H | 1.254801  | -3.771049 | 5.392271  |
| O                                             | 1.653642  | -3.258061 | 0.317510  | H | 2.320499  | -5.253194 | 3.659502  |

|                                                  |           |           |           |   |           |           |           |
|--------------------------------------------------|-----------|-----------|-----------|---|-----------|-----------|-----------|
| H                                                | 2.508722  | -4.674483 | 1.989231  | H | -5.831063 | 5.705602  | 1.545110  |
| H                                                | 3.448215  | -3.933837 | 3.308735  | C | -5.880873 | 3.709732  | -0.308960 |
| H                                                | -0.827442 | -3.346638 | 3.039579  | C | -7.112246 | 4.346040  | -0.535719 |
| H                                                | 0.037117  | -4.385518 | 1.881546  | C | -5.243098 | 3.099463  | -1.401295 |
| H                                                | -0.157480 | -4.894662 | 3.573831  | C | -7.681855 | 4.373130  | -1.805220 |
| K                                                | 1.828294  | 1.019963  | -0.226637 | H | -7.639173 | 4.796688  | 0.301613  |
| Si                                               | -3.392881 | 0.936988  | 1.808096  | C | -5.815021 | 3.121734  | -2.669887 |
| C                                                | -4.079963 | 2.709593  | 2.227137  | H | -4.273553 | 2.628289  | -1.257364 |
| C                                                | -4.084923 | 0.674383  | -0.007146 | C | -7.037330 | 3.759933  | -2.879316 |
| C                                                | -4.570552 | -0.205960 | 2.853826  | H | -8.639750 | 4.865586  | -1.953863 |
| H                                                | -5.160038 | 2.759012  | 2.020590  | H | -5.297820 | 2.649217  | -3.501541 |
| H                                                | -3.614775 | 3.438488  | 1.542522  | H | -7.483117 | 3.779456  | -3.870361 |
| C                                                | -3.832587 | 3.140266  | 3.675714  | O | -1.697703 | -2.042594 | 5.264152  |
| H                                                | -3.668275 | 1.466467  | -0.651461 | O | -2.780428 | -0.460018 | 3.918583  |
| H                                                | -3.674308 | -0.264804 | -0.407810 | C | -1.166145 | -2.173025 | 3.964588  |
| C                                                | -5.608259 | 0.662898  | -0.172166 | C | -2.228393 | -1.443850 | 3.053663  |
| H                                                | -4.372375 | -0.029165 | 3.921990  | C | 0.217420  | -1.504101 | 3.941623  |
| H                                                | -5.619656 | 0.086948  | 2.692338  | H | 0.842101  | -1.990882 | 4.696655  |
| C                                                | -4.408065 | -1.698411 | 2.549458  | H | 0.720119  | -1.583568 | 2.971080  |
| H                                                | -2.764313 | 3.086207  | 3.936892  | H | 0.139080  | -0.454095 | 4.237051  |
| H                                                | -4.168999 | 4.166560  | 3.883418  | C | -0.993815 | -3.655365 | 3.645202  |
| H                                                | -4.356628 | 2.479421  | 4.377801  | H | -0.633091 | -3.802857 | 2.620224  |
| H                                                | -6.058857 | 1.589950  | 0.202383  | H | -0.262708 | -4.094099 | 4.331966  |
| H                                                | -5.918552 | 0.550224  | -1.221973 | H | -1.932543 | -4.201122 | 3.767091  |
| H                                                | -6.062493 | -0.162715 | 0.388701  | C | -1.633018 | -0.770864 | 1.814806  |
| H                                                | -5.075119 | -2.334105 | 3.149443  | H | -1.225530 | -1.514896 | 1.121325  |
| H                                                | -4.614473 | -1.915419 | 1.493163  | H | -2.410684 | -0.206754 | 1.286202  |
| H                                                | -3.379825 | -2.041688 | 2.740615  | H | -0.815176 | -0.084631 | 2.056290  |
| 98                                               |           |           |           | C | -3.357012 | -2.362394 | 2.572066  |
| TS <sub>C-3/C-4</sub> , E( $\omega$ B97XD/BSII)= |           |           |           | H | -3.826761 | -2.876495 | 3.409429  |
| -3206.355735au                                   |           |           |           | H | -4.118955 | -1.749836 | 2.073312  |
| F                                                | -2.054189 | 4.025864  | 4.700190  | H | -3.010085 | -3.112004 | 1.852751  |
| C                                                | -3.645794 | 3.568626  | 5.041839  | B | -2.468580 | -0.816162 | 5.369704  |
| H                                                | -3.418622 | 2.616922  | 5.506754  | O | -1.766025 | 0.420164  | 5.795246  |
| H                                                | -3.873438 | 4.373130  | 5.725363  | C | -1.288745 | 0.736581  | 7.101361  |
| C                                                | -4.268741 | 3.582994  | 3.711035  | K | -5.311583 | 0.363372  | 4.655783  |
| C                                                | -4.093379 | 2.508333  | 2.808521  | C | -0.382399 | -0.375895 | 7.632261  |
| C                                                | -4.857309 | 4.753063  | 3.189582  | C | -2.449282 | 1.027231  | 8.058629  |
| C                                                | -4.607245 | 2.548790  | 1.518178  | C | -0.456313 | 2.017066  | 6.945544  |
| H                                                | -3.589754 | 1.596944  | 3.130680  | H | -0.922589 | -1.315934 | 7.733036  |
| C                                                | -5.371236 | 4.788742  | 1.906002  | H | 0.444487  | -0.546709 | 6.934584  |
| H                                                | -4.928241 | 5.631778  | 3.824376  | H | 0.033666  | -0.102784 | 8.609284  |
| C                                                | -5.286618 | 3.679565  | 1.040610  | H | -2.073119 | 1.345350  | 9.038225  |
| H                                                | -4.503077 | 1.674796  | 0.877511  | H | -3.082147 | 1.826213  | 7.656628  |

|                                              |           |           |           |   |           |           |           |
|----------------------------------------------|-----------|-----------|-----------|---|-----------|-----------|-----------|
| H                                            | -3.076240 | 0.147045  | 8.187217  | C | -1.446039 | 1.453895  | 0.780774  |
| H                                            | 0.428290  | 1.824072  | 6.319906  | H | -1.739957 | 0.581495  | 1.377058  |
| H                                            | -1.047678 | 2.824170  | 6.497233  | H | -0.362842 | 1.423308  | 0.596210  |
| H                                            | -0.089089 | 2.366367  | 7.916470  | C | -2.156893 | 1.466256  | -0.539178 |
| O                                            | -3.692844 | -0.997690 | 6.168041  | C | -3.446400 | 0.938733  | -0.695670 |
| C                                            | -4.166804 | -2.160067 | 6.848065  | C | -1.537962 | 2.028391  | -1.670273 |
| C                                            | -5.416501 | -1.703824 | 7.610703  | C | -4.089789 | 0.960700  | -1.928971 |
| C                                            | -3.145744 | -2.712603 | 7.847667  | H | -3.954530 | 0.511280  | 0.166708  |
| C                                            | -4.546233 | -3.273718 | 5.867810  | C | -2.182694 | 2.044833  | -2.903725 |
| H                                            | -5.178248 | -0.864821 | 8.271772  | H | -0.519031 | 2.398378  | -1.564869 |
| H                                            | -6.208344 | -1.377193 | 6.922422  | C | -3.471428 | 1.511783  | -3.061097 |
| H                                            | -5.829293 | -2.518873 | 8.215175  | H | -5.099181 | 0.564649  | -2.012428 |
| H                                            | -3.560322 | -3.584965 | 8.366557  | H | -1.666112 | 2.455628  | -3.768862 |
| H                                            | -2.236756 | -3.015923 | 7.324561  | C | -4.150149 | 1.523908  | -4.375610 |
| H                                            | -2.892232 | -1.963099 | 8.602929  | C | -4.043588 | 2.630748  | -5.231488 |
| H                                            | -5.276288 | -2.916554 | 5.129928  | C | -4.916119 | 0.428437  | -4.802636 |
| H                                            | -3.653064 | -3.621517 | 5.345659  | C | -4.677629 | 2.641023  | -6.470806 |
| H                                            | -4.997256 | -4.121527 | 6.396535  | H | -3.479142 | 3.501438  | -4.907082 |
| K                                            | -1.045969 | 1.987471  | 3.786538  | C | -5.553430 | 0.439162  | -6.040384 |
| Si                                           | -6.313427 | 3.150137  | 6.017313  | H | -4.991479 | -0.449208 | -4.165162 |
| C                                            | -7.847645 | 2.374874  | 5.095081  | C | -5.436237 | 1.545355  | -6.881219 |
| C                                            | -6.460747 | 2.476499  | 7.826553  | H | -4.587435 | 3.513007  | -7.113976 |
| C                                            | -6.858851 | 4.993660  | 6.131100  | H | -6.136316 | -0.423791 | -6.353036 |
| H                                            | -8.752421 | 2.727264  | 5.613440  | H | -5.932751 | 1.553780  | -7.848086 |
| H                                            | -7.882880 | 1.276423  | 5.217337  | O | 3.173148  | -3.336241 | 0.907847  |
| C                                            | -7.948690 | 2.745678  | 3.609428  | O | 3.024524  | -1.259818 | -0.149470 |
| H                                            | -6.273462 | 1.391486  | 7.815218  | C | 4.498162  | -2.904567 | 0.673780  |
| H                                            | -5.624553 | 2.898156  | 8.403507  | C | 4.329210  | -1.761449 | -0.401425 |
| C                                            | -7.782711 | 2.760101  | 8.549520  | C | 5.093900  | -2.395956 | 1.995292  |
| H                                            | -6.866844 | 5.423187  | 5.119621  | H | 5.040296  | -3.207803 | 2.727387  |
| H                                            | -7.908724 | 5.009110  | 6.462124  | H | 6.142167  | -2.091576 | 1.895454  |
| C                                            | -6.021382 | 5.874030  | 7.063401  | H | 4.503061  | -1.564370 | 2.388007  |
| H                                            | -7.063657 | 2.442350  | 3.033844  | C | 5.319910  | -4.095485 | 0.189516  |
| H                                            | -8.828920 | 2.303222  | 3.123067  | H | 6.342796  | -3.796063 | -0.068295 |
| H                                            | -8.018161 | 3.832191  | 3.486506  | H | 5.373750  | -4.847403 | 0.983759  |
| H                                            | -8.633269 | 2.313773  | 8.019635  | H | 4.862045  | -4.566687 | -0.683964 |
| H                                            | -7.791147 | 2.361211  | 9.573959  | C | 5.349478  | -0.628119 | -0.266671 |
| H                                            | -7.975387 | 3.837465  | 8.618277  | H | 6.369283  | -0.989591 | -0.441470 |
| H                                            | -6.419017 | 6.895270  | 7.137308  | H | 5.138408  | 0.151838  | -1.008809 |
| H                                            | -5.989086 | 5.463203  | 8.080252  | H | 5.332215  | -0.174991 | 0.730056  |
| H                                            | -4.981782 | 5.962508  | 6.722140  | C | 4.382764  | -2.264714 | -1.848037 |
| 98                                           |           |           |           | H | 3.676906  | -3.079849 | -2.006485 |
| C-4, E( $\omega$ B97XD /BSII)=-3206.50838 au |           |           |           | H | 4.106124  | -1.439670 | -2.516367 |
| F                                            | 1.342556  | 1.738329  | -0.544942 | H | 5.383203  | -2.607402 | -2.134265 |

|    |           |           |           |                                                |           |           |           |
|----|-----------|-----------|-----------|------------------------------------------------|-----------|-----------|-----------|
| B  | 2.269306  | -2.211728 | 0.756378  | H                                              | 0.831170  | 3.639433  | 0.255586  |
| O  | 2.043696  | -1.355017 | 1.955293  | H                                              | 0.822942  | 5.414034  | 0.238696  |
| C  | 1.342870  | -1.720941 | 3.134537  | H                                              | 0.943612  | 4.559474  | 1.777855  |
| K  | 0.791795  | -0.445648 | -1.451327 | H                                              | -3.663356 | 5.337147  | 2.619366  |
| C  | 1.868972  | -3.033862 | 3.720078  | H                                              | -5.078572 | 4.444721  | 3.184803  |
| C  | -0.165418 | -1.800607 | 2.875098  | H                                              | -3.533713 | 4.278108  | 4.026347  |
| C  | 1.608149  | -0.591012 | 4.139161  | H                                              | -0.878340 | 1.617667  | 5.323711  |
| H  | 1.758237  | -3.851825 | 3.008793  | H                                              | -2.482284 | 1.957322  | 4.662156  |
| H  | 2.933881  | -2.943378 | 3.954437  | H                                              | -1.451326 | 0.739003  | 3.906491  |
| H  | 1.327469  | -3.288431 | 4.639206  | 95                                             |           |           |           |
| H  | -0.720324 | -1.927957 | 3.812604  | C-5, E( $\omega$ B97XD /BSII)= -3167.077033 au |           |           |           |
| H  | -0.497713 | -0.876878 | 2.391209  | C                                              | -3.658090 | 1.754078  | -1.177250 |
| H  | -0.402396 | -2.623777 | 2.202737  | C                                              | -3.190426 | 2.923666  | -0.589509 |
| H  | 2.687256  | -0.473293 | 4.300634  | C                                              | -3.717450 | 0.556961  | -0.471845 |
| H  | 1.191824  | 0.358459  | 3.776576  | C                                              | -2.793277 | 2.892264  | 0.744706  |
| H  | 1.139113  | -0.797522 | 5.107294  | H                                              | -3.161522 | 3.841153  | -1.168906 |
| O  | 0.964412  | -2.579672 | 0.188803  | C                                              | -3.298501 | 0.543275  | 0.858000  |
| C  | 0.540595  | -3.848127 | -0.298394 | H                                              | -4.060348 | -0.345662 | -0.968209 |
| C  | -0.917532 | -3.649270 | -0.729055 | C                                              | -2.835080 | 1.706702  | 1.498258  |
| C  | 0.601981  | -4.931028 | 0.785461  | H                                              | -2.461942 | 3.815200  | 1.210799  |
| C  | 1.374850  | -4.303302 | -1.499577 | H                                              | -3.304025 | -0.402883 | 1.389671  |
| H  | -1.508420 | -3.257524 | 0.105449  | C                                              | -2.393654 | 1.675659  | 2.912144  |
| H  | -0.992224 | -2.936118 | -1.561322 | C                                              | -1.392502 | 2.541484  | 3.378729  |
| H  | -1.364856 | -4.591696 | -1.063927 | C                                              | -2.942965 | 0.755648  | 3.817828  |
| H  | 0.231572  | -5.885558 | 0.392528  | C                                              | -0.940114 | 2.473386  | 4.692444  |
| H  | 1.632798  | -5.064354 | 1.119443  | H                                              | -0.927668 | 3.248492  | 2.699151  |
| H  | -0.017673 | -4.657814 | 1.645188  | C                                              | -2.489928 | 0.685315  | 5.131785  |
| H  | 1.378510  | -3.538632 | -2.286900 | H                                              | -3.747762 | 0.098990  | 3.498896  |
| H  | 2.402604  | -4.484991 | -1.180102 | C                                              | -1.481635 | 1.539986  | 5.574723  |
| H  | 0.970175  | -5.226582 | -1.930880 | H                                              | -0.150242 | 3.143223  | 5.022073  |
| K  | 2.727273  | 1.106105  | 1.283437  | H                                              | -2.932538 | -0.036277 | 5.813501  |
| Si | -1.755129 | 3.017624  | 1.818277  | H                                              | -1.124230 | 1.481938  | 6.599304  |
| C  | -1.060999 | 4.522478  | 0.909118  | F                                              | -4.025647 | 1.774549  | -2.470796 |
| C  | -3.614557 | 3.207981  | 2.119131  | O                                              | 3.112911  | 0.589876  | 1.103129  |
| C  | -0.854040 | 2.800965  | 3.477048  | O                                              | 1.369330  | -0.750598 | 0.325268  |
| H  | -1.409650 | 5.432830  | 1.417467  | C                                              | 2.901576  | -0.406496 | 2.084890  |
| H  | -1.514505 | 4.542268  | -0.091878 | C                                              | 1.481745  | -0.995045 | 1.724079  |
| C  | 0.469950  | 4.529920  | 0.785966  | C                                              | 4.026550  | -1.446132 | 1.975423  |
| H  | -4.106868 | 3.312454  | 1.142533  | H                                              | 4.982797  | -0.928824 | 2.102818  |
| H  | -3.990472 | 2.264394  | 2.540543  | H                                              | 3.954248  | -2.228660 | 2.739339  |
| C  | -3.993655 | 4.377656  | 3.035162  | H                                              | 4.032374  | -1.901216 | 0.981302  |
| H  | 0.201830  | 2.575390  | 3.264836  | C                                              | 2.962894  | 0.246490  | 3.462808  |
| H  | -0.845740 | 3.770080  | 3.996268  | H                                              | 3.964206  | 0.658823  | 3.625777  |
| C  | -1.446274 | 1.722032  | 4.390700  | H                                              | 2.243682  | 1.065088  | 3.550078  |

|    |           |           |           |                                                |           |           |           |
|----|-----------|-----------|-----------|------------------------------------------------|-----------|-----------|-----------|
| H  | 2.758155  | -0.481857 | 4.256421  | H                                              | -1.129985 | -4.522444 | -0.327306 |
| C  | 1.344026  | -2.494480 | 1.998050  | H                                              | -2.738932 | -4.718984 | -0.997290 |
| H  | 1.441283  | -2.708080 | 3.068573  | C                                              | -2.573084 | -3.115997 | 0.445075  |
| H  | 0.355078  | -2.843070 | 1.677332  | H                                              | -3.530378 | -3.459061 | -3.591681 |
| H  | 2.109006  | -3.083580 | 1.480425  | H                                              | -3.925908 | -2.386994 | -2.267471 |
| C  | 0.323242  | -0.283405 | 2.421295  | C                                              | -3.241656 | -1.362627 | -4.043499 |
| H  | 0.364573  | 0.790555  | 2.251777  | H                                              | 0.018367  | -4.905780 | -2.874270 |
| H  | -0.622084 | -0.649175 | 2.004858  | H                                              | -1.605063 | -5.129386 | -3.479855 |
| H  | 0.297652  | -0.457252 | 3.501912  | C                                              | -0.348835 | -3.947639 | -4.783245 |
| B  | 2.455486  | 0.200798  | -0.126910 | H                                              | -2.849227 | -3.713625 | 1.325749  |
| O  | 3.218505  | -0.667888 | -1.071063 | H                                              | -1.850895 | -2.356742 | 0.777310  |
| C  | 4.353052  | -0.292359 | -1.838974 | H                                              | -3.477621 | -2.580185 | 0.126050  |
| K  | -0.488031 | 0.200368  | -1.366434 | H                                              | -3.066400 | -0.409397 | -3.526929 |
| C  | 4.938039  | -1.603293 | -2.382171 | H                                              | -2.473899 | -1.448274 | -4.823244 |
| C  | 5.415205  | 0.394853  | -0.977306 | H                                              | -4.213345 | -1.270196 | -4.549656 |
| C  | 3.941098  | 0.595236  | -3.019131 | H                                              | 0.041083  | -4.782486 | -5.382709 |
| H  | 5.847816  | -1.423704 | -2.965534 | H                                              | -1.179050 | -3.504326 | -5.346725 |
| H  | 5.190253  | -2.277308 | -1.554161 | H                                              | 0.437448  | -3.178880 | -4.735198 |
| H  | 4.221178  | -2.106254 | -3.046743 | 95                                             |           |           |           |
| H  | 5.721378  | -0.264045 | -0.159630 | C-6, E( $\omega$ B97XD /BSII)= -3167.080564 au |           |           |           |
| H  | 6.297227  | 0.642028  | -1.580203 | C                                              | -3.305646 | -1.398461 | 2.593579  |
| H  | 5.027992  | 1.310349  | -0.532343 | C                                              | -3.867740 | -1.128301 | 1.351763  |
| H  | 3.512356  | 1.530993  | -2.661402 | C                                              | -2.461155 | -0.492080 | 3.225084  |
| H  | 4.798543  | 0.812822  | -3.667342 | C                                              | -3.574944 | 0.083969  | 0.731476  |
| H  | 3.174662  | 0.086680  | -3.617143 | H                                              | -4.512637 | -1.861701 | 0.879670  |
| O  | 1.902859  | 1.339733  | -0.880087 | C                                              | -2.180093 | 0.717143  | 2.591215  |
| C  | 1.853027  | 2.707996  | -0.488137 | H                                              | -2.025410 | -0.741528 | 4.186788  |
| C  | 1.165883  | 3.439554  | -1.647831 | C                                              | -2.730552 | 1.033681  | 1.336576  |
| C  | 3.253203  | 3.294536  | -0.281833 | H                                              | -4.021342 | 0.292318  | -0.235231 |
| C  | 1.034061  | 2.902435  | 0.790638  | H                                              | -1.488749 | 1.403785  | 3.069523  |
| H  | 1.692918  | 3.240948  | -2.586896 | C                                              | -2.403940 | 2.307606  | 0.653936  |
| H  | 0.123378  | 3.111569  | -1.762499 | C                                              | -2.117401 | 3.474831  | 1.378458  |
| H  | 1.149286  | 4.521980  | -1.478281 | C                                              | -2.367624 | 2.376022  | -0.749084 |
| H  | 3.759857  | 2.767550  | 0.529164  | C                                              | -1.784089 | 4.659724  | 0.727873  |
| H  | 3.849680  | 3.203456  | -1.195144 | H                                              | -2.171391 | 3.462435  | 2.463614  |
| H  | 3.188345  | 4.358731  | -0.024619 | C                                              | -2.042533 | 3.565080  | -1.400437 |
| H  | 0.033560  | 2.468099  | 0.680536  | H                                              | -2.564383 | 1.482016  | -1.334028 |
| H  | 1.536887  | 2.417748  | 1.628846  | C                                              | -1.741963 | 4.712052  | -0.665114 |
| H  | 0.912869  | 3.969342  | 1.016678  | H                                              | -1.564529 | 5.548618  | 1.313153  |
| K  | 1.707655  | -2.786610 | -1.413181 | H                                              | -2.036181 | 3.592302  | -2.488398 |
| Si | -1.464612 | -2.920693 | -2.261610 | H                                              | -1.487430 | 5.639253  | -1.171545 |
| C  | -2.001481 | -3.956961 | -0.698661 | O                                              | 3.934890  | -0.454414 | 0.736020  |
| C  | -3.192439 | -2.547509 | -3.073808 | O                                              | 2.059642  | -0.981884 | -0.550063 |
| C  | -0.806532 | -4.376118 | -3.386422 | C                                              | 4.408615  | -0.845266 | -0.538789 |

|   |           |           |           |                                                   |           |           |           |
|---|-----------|-----------|-----------|---------------------------------------------------|-----------|-----------|-----------|
| C | 3.179333  | -1.599193 | -1.176210 | H                                                 | 2.018328  | -3.225994 | 2.212911  |
| C | 4.805410  | 0.412585  | -1.325290 | H                                                 | 3.664312  | -2.559174 | 2.083458  |
| H | 5.560255  | 0.953684  | -0.746189 | H                                                 | 3.060141  | -3.157559 | 3.645648  |
| H | 5.228623  | 0.177792  | -2.308482 | K                                                 | 0.623012  | 0.948209  | -1.894978 |
| H | 3.946659  | 1.078716  | -1.443444 | Si                                                | -1.934789 | -1.215545 | -2.525683 |
| C | 5.643270  | -1.721109 | -0.351171 | C                                                 | -3.219862 | -2.594139 | -2.022957 |
| H | 6.008861  | -2.104429 | -1.311163 | C                                                 | -3.104099 | 0.001899  | -3.511868 |
| H | 6.442817  | -1.130662 | 0.108339  | C                                                 | -1.000842 | -2.120465 | -3.981178 |
| H | 5.434068  | -2.568075 | 0.307232  | H                                                 | -3.604899 | -3.056499 | -2.944007 |
| C | 3.070450  | -1.443191 | -2.693439 | H                                                 | -4.087544 | -2.106913 | -1.552113 |
| H | 3.938291  | -1.883561 | -3.197695 | C                                                 | -2.701394 | -3.703450 | -1.102980 |
| H | 2.173222  | -1.956161 | -3.057480 | H                                                 | -3.814921 | 0.445739  | -2.795805 |
| H | 3.016017  | -0.393235 | -2.999636 | H                                                 | -2.504920 | 0.853002  | -3.877930 |
| C | 3.144564  | -3.098610 | -0.863355 | C                                                 | -3.895526 | -0.591940 | -4.681920 |
| H | 3.224089  | -3.281312 | 0.207866  | H                                                 | -0.328794 | -2.881040 | -3.554730 |
| H | 2.187592  | -3.506997 | -1.211019 | H                                                 | -1.731319 | -2.676443 | -4.589033 |
| H | 3.945608  | -3.646479 | -1.371462 | C                                                 | -0.197290 | -1.198516 | -4.902738 |
| B | 2.514895  | -0.186079 | 0.657191  | H                                                 | -2.498455 | -3.325005 | -0.089111 |
| O | 2.092945  | 1.189547  | 0.263660  | H                                                 | -3.419023 | -4.526578 | -0.977981 |
| C | 2.257595  | 2.376905  | 1.027499  | H                                                 | -1.772018 | -4.147221 | -1.487535 |
| K | -0.298037 | -1.604128 | 0.483146  | H                                                 | -4.553235 | -1.401784 | -4.345223 |
| C | 3.699461  | 2.539607  | 1.513560  | H                                                 | -4.528668 | 0.154625  | -5.183039 |
| C | 1.270608  | 2.408562  | 2.198480  | H                                                 | -3.229171 | -1.016077 | -5.442643 |
| C | 1.921493  | 3.532492  | 0.075119  | H                                                 | 0.295694  | -1.738558 | -5.723264 |
| H | 3.997249  | 1.707455  | 2.150463  | H                                                 | -0.836272 | -0.430646 | -5.357901 |
| H | 4.384728  | 2.562793  | 0.661148  | H                                                 | 0.604181  | -0.672633 | -4.361449 |
| H | 3.809349  | 3.473521  | 2.077840  | F                                                 | -3.558189 | -2.579175 | 3.186228  |
| H | 1.318766  | 3.367413  | 2.729017  | 95                                                |           |           |           |
| H | 0.255740  | 2.278883  | 1.811318  | TS <sub>C-6/C-7</sub> , E( $\omega$ B97XD /BSII)= |           |           |           |
| H | 1.472522  | 1.597109  | 2.896468  | -3167.044214 au                                   |           |           |           |
| H | 2.576314  | 3.499903  | -0.805297 | C                                                 | -3.768290 | 1.274744  | 3.412492  |
| H | 0.872986  | 3.483531  | -0.247225 | C                                                 | -4.521968 | 2.213846  | 4.130272  |
| H | 2.060722  | 4.503357  | 0.563648  | C                                                 | -3.939084 | 1.161288  | 2.021933  |
| O | 1.772032  | -0.572937 | 1.867926  | C                                                 | -5.562411 | 2.870877  | 3.495498  |
| C | 2.265207  | -1.223118 | 3.034954  | H                                                 | -4.314144 | 2.369522  | 5.183201  |
| C | 1.064067  | -1.316196 | 3.982161  | C                                                 | -4.990843 | 1.826411  | 1.406439  |
| C | 3.381180  | -0.420836 | 3.713835  | H                                                 | -3.331090 | 0.453798  | 1.466918  |
| C | 2.784195  | -2.629832 | 2.725059  | C                                                 | -5.839618 | 2.685557  | 2.125777  |
| H | 0.647908  | -0.319115 | 4.161369  | H                                                 | -6.168137 | 3.567816  | 4.068883  |
| H | 0.270668  | -1.941272 | 3.552051  | H                                                 | -5.181911 | 1.640592  | 0.352168  |
| H | 1.349427  | -1.756301 | 4.944102  | C                                                 | -6.979786 | 3.360016  | 1.480233  |
| H | 3.708332  | -0.924556 | 4.631340  | C                                                 | -8.195345 | 3.525576  | 2.164732  |
| H | 4.235293  | -0.328374 | 3.040203  | C                                                 | -6.891408 | 3.848171  | 0.166214  |
| H | 3.032220  | 0.580396  | 3.985067  | C                                                 | -9.275981 | 4.161610  | 1.561523  |

|   |           |           |           |                                |                 |           |           |
|---|-----------|-----------|-----------|--------------------------------|-----------------|-----------|-----------|
| H | -8.300303 | 3.117842  | 3.167059  | H                              | -1.719948       | -0.123701 | -1.980415 |
| C | -7.974445 | 4.478174  | -0.439478 | H                              | -2.755165       | 0.020873  | -0.558867 |
| H | -5.953599 | 3.753111  | -0.376582 | H                              | -1.425159       | 1.172154  | -0.823991 |
| C | -9.172299 | 4.641383  | 0.255932  | H                              | -0.776257       | -2.950659 | 0.299966  |
| H | #####     | 4.269401  | 2.108905  | H                              | -2.382873       | -2.200923 | 0.307580  |
| H | -7.879365 | 4.852709  | -1.455913 | H                              | -1.581319       | -2.555985 | -1.228940 |
| H | #####     | 5.134684  | -0.216269 | H                              | 1.885735        | -2.280646 | 5.070196  |
| F | -2.481590 | 1.010948  | 3.916832  | H                              | 0.456379        | -3.271790 | 4.715272  |
| K | -1.110940 | 2.222423  | 1.846734  | H                              | 2.064858        | -3.993257 | 4.624703  |
| O | 1.050822  | 0.857287  | 2.081833  | H                              | 3.594666        | -3.497328 | 2.709739  |
| B | 0.760347  | -0.553205 | 1.679846  | H                              | 3.180475        | -2.229652 | 1.534804  |
| C | 2.264789  | 1.363569  | 2.618820  | H                              | 3.585785        | -1.801418 | 3.215279  |
| O | 1.448221  | -1.059594 | 0.511466  | H                              | -0.089322       | -3.886666 | 2.297983  |
| O | -0.691201 | -0.420547 | 1.223340  | H                              | 1.086920        | -3.486306 | 1.021949  |
| O | 0.898168  | -1.432099 | 2.849531  | H                              | 1.467644        | -4.723609 | 2.240767  |
| C | 3.464864  | 0.983164  | 1.748413  | Si                             | -4.954337       | -1.356060 | 3.950402  |
| C | 2.453369  | 0.906024  | 4.068850  | C                              | -6.654557       | -0.462433 | 4.097283  |
| C | 2.122819  | 2.893069  | 2.603182  | C                              | -4.962417       | -2.109867 | 2.143735  |
| C | 0.697566  | -0.763492 | -0.647591 | C                              | -5.252596       | -2.957471 | 5.019306  |
| C | -0.792847 | -0.819938 | -0.144277 | H                              | -7.456925       | -1.162536 | 3.821069  |
| K | -1.678972 | -1.556439 | 3.581032  | H                              | -6.688202       | 0.345082  | 3.354186  |
| C | 1.603923  | -2.670400 | 2.951713  | C                              | -6.942388       | 0.104567  | 5.490618  |
| H | 3.572326  | -0.097578 | 1.676786  | H                              | -4.526434       | -1.395111 | 1.429551  |
| H | 3.328205  | 1.366678  | 0.732682  | H                              | -4.281132       | -2.978534 | 2.148211  |
| H | 4.389358  | 1.403617  | 2.161617  | C                              | -6.324979       | -2.557423 | 1.602432  |
| H | 3.342612  | 1.366908  | 4.515158  | H                              | -5.547708       | -2.639929 | 6.029202  |
| H | 1.577163  | 1.190306  | 4.664007  | H                              | -6.121428       | -3.494903 | 4.606787  |
| H | 2.546339  | -0.177408 | 4.120616  | C                              | -4.069098       | -3.921775 | 5.127087  |
| H | 1.940587  | 3.249740  | 1.580713  | H                              | -6.139921       | 0.772102  | 5.827448  |
| H | 1.298956  | 3.217810  | 3.255541  | H                              | -7.880862       | 0.676867  | 5.523096  |
| H | 3.031756  | 3.381670  | 2.970075  | H                              | -7.027050       | -0.695106 | 6.237097  |
| C | 1.104075  | 0.629479  | -1.153952 | H                              | -6.999173       | -1.701255 | 1.485057  |
| C | 1.026797  | -1.794261 | -1.722436 | H                              | -6.246979       | -3.051367 | 0.622665  |
| C | -1.723267 | 0.121705  | -0.912440 | H                              | -6.815043       | -3.262735 | 2.285004  |
| C | -1.411081 | -2.219917 | -0.200310 | H                              | -4.306654       | -4.830408 | 5.698279  |
| C | 1.498292  | -3.077027 | 4.426445  | H                              | -3.726364       | -4.257893 | 4.136762  |
| C | 3.084340  | -2.535911 | 2.578105  | H                              | -3.215462       | -3.447384 | 5.636242  |
| C | 0.977212  | -3.757711 | 2.073334  | 95                             |                 |           |           |
| H | 2.183045  | 0.623323  | -1.336586 | C-7, E( $\omega$ B97XD /BSII)= | -3167.190037 au |           |           |
| H | 0.598738  | 0.907502  | -2.085540 | C                              | -3.133824       | -1.070152 | -2.193275 |
| H | 0.913472  | 1.388259  | -0.389868 | C                              | -3.460000       | -1.572108 | -0.919596 |
| H | 0.413399  | -1.644995 | -2.618851 | C                              | -3.195342       | 0.322410  | -2.370042 |
| H | 2.079393  | -1.700040 | -2.008899 | C                              | -3.743628       | -0.715072 | 0.145464  |
| H | 0.870360  | -2.812306 | -1.357355 | H                              | -3.455834       | -2.646150 | -0.740346 |



|   |           |           |           |    |           |           |           |
|---|-----------|-----------|-----------|----|-----------|-----------|-----------|
| C | -3.453785 | 1.183132  | -1.310397 | H  | 2.370193  | -3.929544 | 2.027700  |
| H | -2.969056 | 0.756454  | -3.341291 | C  | 5.217133  | 1.476064  | 0.247498  |
| C | -3.686188 | 0.679572  | -0.022652 | C  | 5.838204  | -0.933627 | 0.135148  |
| H | -3.937358 | -1.125334 | 1.134876  | H  | 4.886206  | 0.525957  | -2.681656 |
| H | -3.405444 | 2.255255  | -1.463134 | H  | 3.145331  | 0.620697  | -2.987105 |
| C | -3.711304 | 1.594848  | 1.141447  | H  | 3.949799  | 1.820811  | -1.945588 |
| C | -4.615735 | 1.431045  | 2.198417  | H  | 3.415592  | -2.301224 | -0.752277 |
| C | -2.749861 | 2.619263  | 1.212109  | H  | 2.717915  | -1.660163 | -2.241833 |
| C | -4.568824 | 2.275663  | 3.305147  | H  | 4.476978  | -1.872924 | -2.108383 |
| H | -5.370467 | 0.649726  | 2.141856  | H  | 3.411950  | 0.884210  | 3.660654  |
| C | -2.705465 | 3.454584  | 2.326262  | H  | 4.189036  | 2.298352  | 2.955617  |
| H | -2.013122 | 2.704460  | 0.409017  | H  | 3.224968  | 2.468373  | 4.444070  |
| C | -3.612609 | 3.289163  | 3.373247  | H  | 0.666978  | 2.311818  | 4.316993  |
| H | -5.282765 | 2.144798  | 4.114674  | H  | -0.109229 | 2.001358  | 2.753250  |
| H | -1.946258 | 4.231389  | 2.383030  | H  | 0.801583  | 0.709035  | 3.550574  |
| H | -3.573396 | 3.943860  | 4.240279  | H  | 2.838340  | 4.081376  | 1.812017  |
| F | -0.686647 | 2.075227  | -1.108011 | H  | 1.050990  | 3.970450  | 1.784789  |
| K | -0.347381 | -0.064605 | 0.022844  | H  | 1.898438  | 4.305413  | 3.299879  |
| K | 1.538704  | 2.791576  | -0.951325 | H  | 5.793225  | 1.562798  | 1.174147  |
| O | 1.537843  | -0.657649 | 1.743819  | H  | 5.874437  | 1.731286  | -0.591742 |
| O | 2.392767  | 0.172702  | -0.438269 | H  | 4.398342  | 2.198403  | 0.309877  |
| O | 2.149017  | 1.619197  | 1.352067  | H  | 6.435669  | -0.814838 | -0.776672 |
| B | 2.522654  | 0.198927  | 1.072254  | H  | 6.488008  | -0.748341 | 0.996924  |
| C | 1.732121  | -1.887447 | 2.429279  | H  | 5.492977  | -1.968805 | 0.194295  |
| C | 3.643817  | -0.153142 | -1.025065 | Si | -2.345445 | -2.120172 | -3.542274 |
| C | 2.048304  | 2.228212  | 2.631855  | C  | -0.473765 | -1.781338 | -3.486692 |
| O | 3.891987  | -0.205614 | 1.315348  | C  | -2.666287 | -3.956782 | -3.211981 |
| C | 0.330649  | -2.331795 | 2.865690  | C  | -3.032840 | -1.624009 | -5.233203 |
| C | 2.615664  | -1.702684 | 3.667501  | H  | 0.004432  | -2.418606 | -4.244955 |
| C | 2.344001  | -2.956464 | 1.522717  | H  | -0.090357 | -2.148502 | -2.521888 |
| C | 4.667045  | 0.043550  | 0.161311  | C  | -0.051228 | -0.320148 | -3.705636 |
| C | 3.919170  | 0.761836  | -2.223079 | H  | -2.191437 | -4.232557 | -2.259499 |
| C | 3.572642  | -1.587540 | -1.559073 | H  | -3.745474 | -4.099340 | -3.062004 |
| C | 3.292608  | 1.951996  | 3.478906  | C  | -2.166129 | -4.882749 | -4.328263 |
| C | 0.775753  | 1.782107  | 3.362661  | H  | -2.809707 | -0.562811 | -5.409502 |
| C | 1.954505  | 3.737016  | 2.364868  | H  | -2.477668 | -2.174212 | -6.006065 |
| H | -0.149814 | -1.547250 | 3.460778  | C  | -4.538799 | -1.874059 | -5.377406 |
| H | -0.302223 | -2.539079 | 1.991975  | H  | -0.457062 | 0.370077  | -2.954676 |
| H | 0.373327  | -3.246708 | 3.467125  | H  | 1.041646  | -0.222476 | -3.678391 |
| H | 2.725776  | -2.650670 | 4.207985  | H  | -0.382272 | 0.041747  | -4.687068 |
| H | 3.605162  | -1.352145 | 3.365805  | H  | -1.085751 | -4.778456 | -4.485731 |
| H | 2.172359  | -0.971380 | 4.351437  | H  | -2.361101 | -5.937453 | -4.098849 |
| H | 1.754301  | -3.060583 | 0.604373  | H  | -2.657928 | -4.660106 | -5.282761 |
| H | 3.364000  | -2.670886 | 1.259275  | H  | -4.912251 | -1.562317 | -6.360561 |

|                                                  |              |           |           |                             |              |           |           |
|--------------------------------------------------|--------------|-----------|-----------|-----------------------------|--------------|-----------|-----------|
| H                                                | -4.781780    | -2.937073 | -5.257715 | H                           | -1.425760    | 0.373516  | -2.637904 |
| H                                                | -5.105291    | -1.322784 | -4.617507 | C                           | -0.131845    | 1.969882  | 1.733208  |
| 30                                               |              |           |           | H                           | -0.865418    | 1.572310  | 2.448594  |
| A, E( $\omega$ B97XD/BSII)=                      | -1666.105675 | au        |           | H                           | 0.852127     | 1.815840  | 2.196914  |
| C                                                | -0.753923    | 1.247181  | 3.023867  | C                           | -0.377776    | 3.466482  | 1.506124  |
| C                                                | -0.581663    | 2.093229  | 4.303595  | H                           | -1.365670    | 3.650686  | 1.066381  |
| H                                                | 0.117299     | 1.590044  | 4.984565  | H                           | -0.326875    | 4.034903  | 2.443617  |
| H                                                | -0.146094    | 3.066789  | 4.043450  | H                           | 0.366647     | 3.895219  | 0.824185  |
| H                                                | -1.523257    | 2.268187  | 4.842181  | C                           | 1.034533     | 1.643746  | -1.110495 |
| C                                                | -1.378372    | -0.113588 | 3.415108  | H                           | 1.001899     | 1.032755  | -2.023202 |
| H                                                | -2.366810    | -0.022040 | 3.885318  | H                           | 0.687935     | 2.643850  | -1.408365 |
| H                                                | -1.478538    | -0.739229 | 2.518744  | C                           | 2.471613     | 1.715013  | -0.579541 |
| H                                                | -0.720666    | -0.634815 | 4.126242  | H                           | 3.169073     | 2.094022  | -1.337544 |
| C                                                | -1.751346    | 1.971232  | 2.088098  | H                           | 2.542426     | 2.380435  | 0.289710  |
| H                                                | -1.363050    | 2.967165  | 1.828960  | H                           | 2.825310     | 0.728072  | -0.259932 |
| H                                                | -1.865316    | 1.394943  | 1.160747  | B                           | 0.351148     | -0.978553 | 0.557387  |
| H                                                | -2.745694    | 2.109428  | 2.533788  | O                           | -0.463493    | -2.077832 | 0.421406  |
| O                                                | 0.456399     | 1.066450  | 2.400861  | O                           | 1.613151     | -1.310672 | 0.992442  |
| K                                                | 2.245289     | -0.654332 | 2.572559  | C                           | 0.373753     | -3.256392 | 0.558240  |
| C                                                | 4.649302     | 0.339678  | 0.095241  | C                           | 1.584547     | -2.708450 | 1.382184  |
| C                                                | 4.438947     | 0.545343  | -1.423237 | C                           | -0.427249    | -4.351325 | 1.243459  |
| H                                                | 3.639257     | -0.119966 | -1.772186 | H                           | -1.250278    | -4.668771 | 0.595456  |
| H                                                | 4.128533     | 1.581937  | -1.620635 | H                           | 0.206535     | -5.222540 | 1.444057  |
| H                                                | 5.340397     | 0.350303  | -2.019926 | H                           | -0.856028    | -4.003767 | 2.186001  |
| C                                                | 5.167889     | -1.102939 | 0.309437  | C                           | 0.756206     | -3.680773 | -0.859301 |
| H                                                | 6.097331     | -1.318128 | -0.234748 | H                           | 1.335385     | -4.609979 | -0.861438 |
| H                                                | 5.360887     | -1.272133 | 1.378629  | H                           | -0.157841    | -3.838798 | -1.439636 |
| H                                                | 4.404550     | -1.819652 | -0.022392 | H                           | 1.341249     | -2.899723 | -1.355398 |
| C                                                | 5.737722     | 1.321610  | 0.580827  | C                           | 1.344745     | -2.733359 | 2.891357  |
| H                                                | 5.405035     | 2.354965  | 0.412080  | H                           | 1.375404     | -3.753085 | 3.288653  |
| H                                                | 5.888179     | 1.194432  | 1.660280  | H                           | 2.124610     | -2.144043 | 3.382883  |
| H                                                | 6.704260     | 1.187543  | 0.075794  | H                           | 0.376446     | -2.287479 | 3.140221  |
| O                                                | 3.476504     | 0.544574  | 0.779411  | C                           | 2.928201     | -3.336140 | 1.047503  |
| K                                                | 1.700069     | 2.282408  | 0.624445  | H                           | 3.194202     | -3.178113 | -0.000065 |
| 43                                               |              |           |           | H                           | 3.710239     | -2.884362 | 1.665849  |
| Et <sub>3</sub> SiBpin, E( $\omega$ B97XD/BSII)= |              |           |           | H                           | 2.912313     | -4.413317 | 1.248714  |
| -1666.105675                                     | au           |           |           | 73                          |              |           |           |
| Si                                               | -0.201874    | 0.924929  | 0.144995  | B, E( $\omega$ B97XD/BSII)= | -2604.579078 | au        |           |
| C                                                | -1.950116    | 0.955763  | -0.594694 | Si                          | -1.059843    | -0.937631 | 2.193061  |
| H                                                | -2.214864    | 1.993665  | -0.842485 | C                           | -2.456499    | -2.245087 | 2.284420  |
| H                                                | -2.659468    | 0.638811  | 0.182496  | H                           | -3.034014    | -2.064885 | 3.203160  |
| C                                                | -2.100229    | 0.060031  | -1.831345 | H                           | -1.975018    | -3.224059 | 2.425508  |
| H                                                | -1.863676    | -0.982028 | -1.588230 | C                           | -3.398866    | -2.319903 | 1.080208  |
| H                                                | -3.121109    | 0.086466  | -2.233509 | H                           | -2.835191    | -2.537871 | 0.167333  |

|   |           |           |           |                                 |              |           |           |
|---|-----------|-----------|-----------|---------------------------------|--------------|-----------|-----------|
| H | -4.162855 | -3.099382 | 1.205512  | H                               | -2.437774    | -0.602946 | -0.980542 |
| H | -3.926465 | -1.371631 | 0.921493  | H                               | -2.674894    | 0.805556  | 0.073770  |
| C | 0.101244  | -1.433544 | 3.659210  | C                               | -0.544175    | 0.472526  | -2.630951 |
| H | 0.699656  | -2.300354 | 3.334512  | H                               | 0.465472     | 0.822776  | -2.880475 |
| H | 0.792094  | -0.590590 | 3.825623  | H                               | -0.560029    | -0.618842 | -2.663446 |
| C | -0.590602 | -1.766092 | 4.984303  | H                               | -1.233600    | 0.862565  | -3.389950 |
| H | -1.257147 | -2.628702 | 4.875661  | O                               | -0.001647    | 0.474100  | -0.266031 |
| H | 0.123286  | -2.002312 | 5.786289  | K                               | 3.153463     | -1.187107 | 2.800095  |
| H | -1.202784 | -0.926451 | 5.333433  | C                               | 4.920930     | 1.877181  | 2.762880  |
| C | -1.800394 | 0.727837  | 2.790415  | C                               | 5.396684     | 1.356371  | 4.139669  |
| H | -2.654020 | 0.999260  | 2.155470  | H                               | 4.543687     | 1.303179  | 4.829819  |
| H | -2.220452 | 0.586544  | 3.796826  | H                               | 5.820896     | 0.347378  | 4.030533  |
| C | -0.789183 | 1.878621  | 2.804517  | H                               | 6.166316     | 1.989217  | 4.600797  |
| H | -1.227182 | 2.824977  | 3.149740  | C                               | 4.379330     | 3.311144  | 2.962357  |
| H | 0.063597  | 1.662737  | 3.462793  | H                               | 5.109995     | 3.990814  | 3.420569  |
| H | -0.398244 | 2.041679  | 1.793937  | H                               | 4.091384     | 3.744101  | 1.992992  |
| B | -0.008835 | -0.884788 | 0.360746  | H                               | 3.486616     | 3.279868  | 3.599335  |
| O | -0.453814 | -1.908736 | -0.589068 | C                               | 6.140234     | 1.935178  | 1.819303  |
| O | 1.444725  | -1.262971 | 0.643220  | H                               | 6.531345     | 0.921924  | 1.663024  |
| C | 0.490893  | -2.952636 | -0.659444 | H                               | 5.833297     | 2.326983  | 0.840139  |
| C | 1.839316  | -2.231384 | -0.334262 | H                               | 6.953914     | 2.567320  | 2.199844  |
| C | 0.142170  | -4.017829 | 0.390601  | O                               | 3.946501     | 1.056866  | 2.237801  |
| H | -0.905114 | -4.303632 | 0.256485  | K                               | 2.249649     | 1.547799  | 0.462612  |
| H | 0.762043  | -4.917784 | 0.300476  | 73                              |              |           |           |
| H | 0.248538  | -3.615216 | 1.402459  | TSB/C, E( $\omega$ B97XD/BSII)= | -2604.579078 |           |           |
| C | 0.431365  | -3.577876 | -2.049602 | au                              |              |           |           |
| H | 1.210022  | -4.339161 | -2.181438 | Si                              | -1.664819    | -0.954050 | 3.078179  |
| H | -0.542286 | -4.058732 | -2.190029 | C                               | -2.800701    | -2.510071 | 2.847938  |
| H | 0.544128  | -2.820168 | -2.829032 | H                               | -3.555951    | -2.535931 | 3.648760  |
| C | 2.901978  | -3.162507 | 0.248649  | H                               | -2.188940    | -3.415226 | 2.988343  |
| H | 3.108326  | -3.991365 | -0.437493 | C                               | -3.504222    | -2.580579 | 1.489582  |
| H | 3.852660  | -2.629391 | 0.391853  | H                               | -2.780990    | -2.534949 | 0.667650  |
| H | 2.581695  | -3.599045 | 1.201182  | H                               | -4.096621    | -3.499056 | 1.367908  |
| C | 2.435290  | -1.512785 | -1.548572 | H                               | -4.192048    | -1.735967 | 1.355876  |
| H | 1.690102  | -0.860080 | -2.004186 | C                               | -1.170865    | -1.169515 | 4.980995  |
| H | 3.288151  | -0.902944 | -1.221947 | H                               | -0.715509    | -2.173713 | 5.082775  |
| H | 2.805350  | -2.212961 | -2.305842 | H                               | -0.381117    | -0.446522 | 5.247132  |
| C | -0.942596 | 0.945088  | -1.227384 | C                               | -2.292093    | -1.062932 | 6.019319  |
| C | -0.886232 | 2.476041  | -1.171976 | H                               | -3.114232    | -1.752108 | 5.793517  |
| H | -1.166895 | 2.837263  | -0.176835 | H                               | -1.943731    | -1.288653 | 7.037608  |
| H | 0.125064  | 2.838327  | -1.405944 | H                               | -2.715748    | -0.052184 | 6.040850  |
| H | -1.567481 | 2.923543  | -1.904368 | C                               | -3.024536    | 0.434562  | 3.225181  |
| C | -2.369852 | 0.484300  | -0.925523 | H                               | -3.576896    | 0.511825  | 2.278741  |
| H | -3.070829 | 0.914210  | -1.650840 | H                               | -3.766983    | 0.091799  | 3.960803  |

|   |           |           |           |                                            |           |           |           |
|---|-----------|-----------|-----------|--------------------------------------------|-----------|-----------|-----------|
| C | -2.528740 | 1.825397  | 3.628151  | H                                          | 4.048763  | 0.731548  | 6.955550  |
| H | -3.346693 | 2.526959  | 3.843551  | C                                          | 2.265712  | 2.429771  | 5.690333  |
| H | -1.894655 | 1.788523  | 4.525438  | H                                          | 2.799112  | 2.925914  | 6.512353  |
| H | -1.938608 | 2.288619  | 2.822044  | H                                          | 2.026201  | 3.198178  | 4.940596  |
| B | 0.015242  | -0.867953 | 0.299266  | H                                          | 1.321365  | 2.029250  | 6.079802  |
| O | -0.513416 | -1.893940 | -0.465524 | C                                          | 4.374270  | 1.875367  | 4.444038  |
| O | 1.281820  | -1.216658 | 0.826362  | H                                          | 4.953952  | 1.074382  | 3.968617  |
| C | 0.380737  | -3.017941 | -0.370682 | H                                          | 4.126005  | 2.611510  | 3.667571  |
| C | 1.731749  | -2.322869 | 0.007067  | H                                          | 5.008393  | 2.368527  | 5.193518  |
| C | -0.143606 | -3.947060 | 0.721374  | O                                          | 2.336883  | 0.672280  | 4.051492  |
| H | -1.163349 | -4.250023 | 0.470633  | K                                          | 0.748762  | 1.554319  | 2.356093  |
| H | 0.470589  | -4.848742 | 0.819417  | 73                                         |           |           |           |
| H | -0.195866 | -3.421437 | 1.679438  | C, E( $\omega$ B97XD/BSII)= -2604.58237 au |           |           |           |
| C | 0.394693  | -3.733045 | -1.713391 | K                                          | -0.469295 | -0.870709 | 0.473893  |
| H | 1.136905  | -4.539402 | -1.716090 | K                                          | 1.614816  | 0.730771  | -2.039552 |
| H | -0.588793 | -4.173559 | -1.903843 | O                                          | 1.656840  | -0.934883 | 1.997468  |
| H | 0.619384  | -3.044525 | -2.531536 | O                                          | 2.046638  | -1.480814 | -0.395022 |
| C | 2.698658  | -3.192752 | 0.795983  | O                                          | 2.566547  | 0.622055  | 0.418480  |
| H | 3.039248  | -4.034284 | 0.183441  | B                                          | 2.578520  | -0.807915 | 0.856622  |
| H | 3.580176  | -2.608286 | 1.083355  | C                                          | 1.815341  | -1.691363 | 3.194212  |
| H | 2.240329  | -3.614122 | 1.695833  | C                                          | 3.013168  | -2.399696 | -0.894545 |
| C | 2.455241  | -1.722044 | -1.199880 | C                                          | 2.948779  | 1.745898  | 1.202107  |
| H | 1.773692  | -1.110280 | -1.798377 | O                                          | 3.857698  | -1.439915 | 1.083350  |
| H | 3.261358  | -1.075149 | -0.839564 | C                                          | 0.529758  | -1.452995 | 3.995108  |
| H | 2.888914  | -2.494679 | -1.843236 | C                                          | 3.016348  | -1.207521 | 4.012997  |
| C | -1.232177 | 0.954244  | -0.872933 | C                                          | 1.967950  | -3.186264 | 2.909138  |
| C | -1.333459 | 2.453027  | -0.596590 | C                                          | 4.331652  | -1.993495 | -0.128170 |
| H | -1.744845 | 2.629718  | 0.403930  | C                                          | 3.126847  | -2.270750 | -2.416353 |
| H | -0.346820 | 2.926772  | -0.670637 | C                                          | 2.530491  | -3.821735 | -0.594254 |
| H | -1.996026 | 2.935824  | -1.322135 | C                                          | 4.296919  | 1.519258  | 1.889533  |
| C | -2.596760 | 0.294491  | -0.698319 | C                                          | 1.859595  | 2.092973  | 2.223763  |
| H | -3.330542 | 0.778391  | -1.353015 | C                                          | 3.090708  | 2.913677  | 0.216630  |
| H | -2.555143 | -0.767500 | -0.944867 | H                                          | 0.371460  | -0.380355 | 4.152064  |
| H | -2.929722 | 0.391990  | 0.337032  | H                                          | -0.343340 | -1.859174 | 3.465269  |
| C | -0.669037 | 0.704032  | -2.271968 | H                                          | 0.574698  | -1.943406 | 4.973614  |
| H | 0.321767  | 1.161669  | -2.371016 | H                                          | 3.095300  | -1.773808 | 4.948702  |
| H | -0.583669 | -0.370326 | -2.455817 | H                                          | 3.935582  | -1.346548 | 3.440103  |
| H | -1.328334 | 1.134689  | -3.033812 | H                                          | 2.910606  | -0.147805 | 4.266838  |
| O | -0.281529 | 0.461510  | 0.099749  | H                                          | 1.140832  | -3.546899 | 2.286066  |
| K | 1.575387  | -1.625690 | 3.642409  | H                                          | 2.909199  | -3.363845 | 2.386150  |
| C | 3.075952  | 1.287726  | 5.035244  | H                                          | 1.969111  | -3.763097 | 3.841540  |
| C | 3.458466  | 0.281453  | 6.146236  | C                                          | 5.148633  | -0.920376 | -0.864093 |
| H | 2.547242  | -0.144144 | 6.588421  | C                                          | 5.245173  | -3.171415 | 0.195554  |
| H | 4.052482  | -0.537158 | 5.715061  | H                                          | 3.876722  | -2.966040 | -2.810239 |

|                                                      |           |           |           |                |           |           |           |
|------------------------------------------------------|-----------|-----------|-----------|----------------|-----------|-----------|-----------|
| H                                                    | 2.167270  | -2.511637 | -2.887501 | -1477.44735 au |           |           |           |
| H                                                    | 3.431268  | -1.267123 | -2.732436 | O              | -3.550360 | -1.135736 | 0.227409  |
| H                                                    | 2.449219  | -3.993137 | 0.477935  | O              | -1.759966 | -2.608020 | 0.284167  |
| H                                                    | 1.535026  | -3.950819 | -1.035097 | C              | -4.104567 | -2.371729 | 0.641798  |
| H                                                    | 3.192209  | -4.583271 | -1.021250 | C              | -2.901584 | -3.417999 | 0.500599  |
| H                                                    | 4.252217  | 0.674258  | 2.575127  | C              | -4.611280 | -2.219961 | 2.082918  |
| H                                                    | 5.066807  | 1.297564  | 1.144623  | H              | -5.364914 | -1.425237 | 2.101519  |
| H                                                    | 4.596104  | 2.412514  | 2.450710  | H              | -5.074890 | -3.137101 | 2.463649  |
| H                                                    | 2.114814  | 3.004141  | 2.777843  | H              | -3.795685 | -1.924223 | 2.744937  |
| H                                                    | 0.906312  | 2.262795  | 1.706930  | C              | -5.301581 | -2.670215 | -0.259970 |
| H                                                    | 1.721774  | 1.271565  | 2.926588  | H              | -5.782401 | -3.618314 | 0.007308  |
| H                                                    | 3.841924  | 2.677201  | -0.548159 | H              | -6.038944 | -1.868501 | -0.146329 |
| H                                                    | 2.130964  | 3.130489  | -0.272699 | H              | -5.014989 | -2.708137 | -1.313836 |
| H                                                    | 3.408044  | 3.829509  | 0.727061  | C              | -2.665289 | -4.262559 | 1.757226  |
| H                                                    | 5.957797  | -0.596209 | -0.202224 | H              | -3.526010 | -4.895663 | 2.002379  |
| H                                                    | 5.592865  | -1.288458 | -1.795764 | H              | -1.804577 | -4.922111 | 1.587370  |
| H                                                    | 4.532265  | -0.040804 | -1.070777 | H              | -2.439371 | -3.623293 | 2.614209  |
| H                                                    | 5.590801  | -3.669389 | -0.718062 | C              | -3.031854 | -4.357619 | -0.701356 |
| H                                                    | 6.123022  | -2.813045 | 0.743192  | H              | -3.143534 | -3.799354 | -1.632946 |
| H                                                    | 4.737676  | -3.907515 | 0.823882  | H              | -2.115443 | -4.954389 | -0.782250 |
| Si                                                   | -1.656335 | 0.365183  | -2.410883 | H              | -3.878209 | -5.045915 | -0.598663 |
| C                                                    | -2.088040 | -1.447279 | -2.988254 | B              | -2.128524 | -1.169251 | 0.463106  |
| C                                                    | -3.403996 | 1.151030  | -2.108760 | O              | -1.671801 | -0.858016 | 1.855048  |
| C                                                    | -1.133110 | 1.147792  | -4.125238 | C              | -1.781831 | 0.420390  | 2.468221  |
| H                                                    | -2.713944 | -1.414577 | -3.893114 | K              | 0.569541  | -1.813454 | 0.819190  |
| H                                                    | -2.709988 | -1.931266 | -2.217067 | C              | -3.044268 | 1.173656  | 2.040990  |
| C                                                    | -0.856317 | -2.315748 | -3.267351 | C              | -0.548020 | 1.274224  | 2.130445  |
| H                                                    | -3.848581 | 0.635201  | -1.242252 | C              | -1.822159 | 0.154262  | 3.975534  |
| H                                                    | -3.256540 | 2.189292  | -1.776084 | H              | -3.021528 | 1.388514  | 0.970828  |
| C                                                    | -4.392232 | 1.121692  | -3.279193 | H              | -3.934469 | 0.573824  | 2.238820  |
| H                                                    | -0.211810 | 0.666251  | -4.498985 | H              | -3.120754 | 2.120542  | 2.589431  |
| H                                                    | -1.899858 | 0.887791  | -4.870699 | H              | -0.594637 | 2.256355  | 2.615889  |
| C                                                    | -0.952193 | 2.668515  | -4.104787 | H              | 0.370063  | 0.781932  | 2.487659  |
| H                                                    | -0.214344 | -2.413144 | -2.378920 | H              | -0.483713 | 1.413207  | 1.048103  |
| H                                                    | -1.110201 | -3.334199 | -3.594368 | H              | -2.713319 | -0.427121 | 4.233815  |
| H                                                    | -0.232373 | -1.875128 | -4.057938 | H              | -0.941095 | -0.424441 | 4.280113  |
| H                                                    | -4.583197 | 0.095863  | -3.617067 | H              | -1.837756 | 1.088921  | 4.548597  |
| H                                                    | -5.363812 | 1.565425  | -3.018128 | O              | -1.308599 | -0.325325 | -0.415459 |
| H                                                    | -4.006506 | 1.677659  | -4.142623 | C              | -1.606679 | -0.037878 | -1.775492 |
| H                                                    | -0.632540 | 3.077060  | -5.073600 | C              | -0.300478 | 0.491091  | -2.374519 |
| H                                                    | -1.890124 | 3.167709  | -3.832878 | C              | -2.687160 | 1.046470  | -1.839889 |
| H                                                    | -0.211855 | 2.991167  | -3.354624 | C              | -2.063987 | -1.279607 | -2.544731 |
| 50                                                   |           |           |           | H              | 0.067954  | 1.336679  | -1.782237 |
| K(O'Bu) <sub>2</sub> Bpin, E( $\omega$ B97XD/BSII) = |           |           |           | H              | 0.468341  | -0.293828 | -2.375953 |

|                                                                  |           |           |           |                                             |           |           |           |
|------------------------------------------------------------------|-----------|-----------|-----------|---------------------------------------------|-----------|-----------|-----------|
| H                                                                | -0.439684 | 0.825535  | -3.408697 | H                                           | -2.342188 | -0.184726 | -0.317376 |
| H                                                                | -2.920466 | 1.313768  | -2.877970 | H                                           | -0.522001 | 1.056441  | 1.687714  |
| H                                                                | -3.594789 | 0.682978  | -1.351527 | H                                           | 2.363866  | 2.061727  | -0.299780 |
| H                                                                | -2.344964 | 1.948245  | -1.319145 | H                                           | -0.274101 | -1.965356 | 1.553243  |
| H                                                                | -1.341095 | -2.093580 | -2.427545 | H                                           | 2.549532  | -0.173270 | -1.022197 |
| H                                                                | -3.024491 | -1.620448 | -2.154908 | H                                           | 1.691590  | -1.996697 | 0.198706  |
| H                                                                | -2.173375 | -1.052334 | -3.612066 | C                                           | -0.872257 | 1.135225  | -1.047773 |
| 23                                                               |           |           |           | H                                           | -1.532067 | 1.376901  | -1.881217 |
| D, E( $\omega$ B97XD/BSII) = -1127.102983 au                     |           |           |           | C                                           | 0.275921  | 2.097975  | -0.855820 |
| C                                                                | -1.880348 | 0.986291  | -0.576338 | H                                           | 0.634153  | 2.382049  | -1.853841 |
| H                                                                | -1.987396 | 2.039691  | -0.877960 | H                                           | -0.068026 | 3.030941  | -0.379396 |
| H                                                                | -2.648451 | 0.809743  | 0.191059  | Ni                                          | -0.004559 | -0.745717 | -1.424407 |
| C                                                                | -2.146169 | 0.090682  | -1.788518 | C                                           | 1.086389  | -1.013702 | -3.223890 |
| H                                                                | -2.091610 | -0.973923 | -1.516793 | C                                           | -1.417933 | -2.235199 | -1.954927 |
| H                                                                | -3.136699 | 0.261976  | -2.233401 | C                                           | -0.260548 | -2.835181 | -1.481814 |
| H                                                                | -1.402430 | 0.257240  | -2.578735 | C                                           | -0.038048 | -0.239811 | -3.467661 |
| C                                                                | -0.151333 | 1.955773  | 1.747068  | H                                           | 2.025176  | -0.476388 | -3.104131 |
| H                                                                | -0.905830 | 1.587853  | 2.458581  | C                                           | 1.221166  | -2.495266 | -3.528543 |
| H                                                                | 0.812297  | 1.862225  | 2.269300  | C                                           | -1.802941 | -2.080798 | -3.416121 |
| C                                                                | -0.418769 | 3.431090  | 1.427206  | H                                           | -2.241304 | -2.155212 | -1.247739 |
| H                                                                | -1.385099 | 3.563128  | 0.925605  | C                                           | 0.877870  | -3.376172 | -2.315415 |
| H                                                                | -0.431150 | 4.058037  | 2.330605  | H                                           | -0.284189 | -3.201530 | -0.455225 |
| H                                                                | 0.349530  | 3.840227  | 0.759669  | H                                           | 0.117183  | 0.835833  | -3.550853 |
| C                                                                | 1.035204  | 1.611887  | -1.046884 | C                                           | -1.363856 | -0.726938 | -4.002354 |
| H                                                                | 0.999597  | 1.046536  | -1.989670 | H                                           | 2.250631  | -2.704884 | -3.843011 |
| H                                                                | 0.627373  | 2.607873  | -1.280512 | H                                           | 0.592563  | -2.756645 | -4.385865 |
| C                                                                | 2.486793  | 1.751145  | -0.584442 | H                                           | -1.384841 | -2.907233 | -4.000074 |
| H                                                                | 3.128214  | 2.231521  | -1.336713 | H                                           | -2.891375 | -2.174839 | -3.511201 |
| H                                                                | 2.556012  | 2.349960  | 0.332882  | H                                           | 0.673519  | -4.411011 | -2.636278 |
| H                                                                | 2.929294  | 0.769763  | -0.357387 | H                                           | 1.761004  | -3.428814 | -1.665793 |
| Si                                                               | -0.137382 | 0.751875  | 0.230704  | H                                           | -2.118461 | 0.025675  | -3.740197 |
| K                                                                | 0.690420  | -2.305824 | 0.716792  | H                                           | -1.349395 | -0.773108 | -5.103833 |
| 41                                                               |           |           |           | 64                                          |           |           |           |
| Ni(cod) <sub>2</sub> , E( $\omega$ B97XD/BSII) = -794.9880765 au |           |           |           | E, E( $\omega$ B97XD/BSII) = -1922.12016 au |           |           |           |
| C                                                                | -1.355484 | 0.228194  | -0.116146 | Ni                                          | 0.602517  | -0.527059 | -1.867092 |
| C                                                                | -0.877808 | 0.089236  | 1.318833  | Si                                          | 0.292209  | 0.586041  | 0.116348  |
| C                                                                | 1.453029  | 1.496252  | -0.068932 | C                                           | 2.088028  | 0.593826  | 0.810009  |
| C                                                                | 0.212427  | -0.984342 | 1.475368  | C                                           | -0.183821 | 2.476230  | 0.164736  |
| C                                                                | 1.682243  | 0.031275  | -0.397262 | C                                           | -0.748243 | -0.122907 | 1.587167  |
| C                                                                | 1.167280  | -1.047083 | 0.306008  | K                                           | -2.177352 | 0.577192  | -1.999949 |
| H                                                                | -1.731110 | -0.172400 | 1.956041  | H                                           | 2.078986  | 1.004423  | 1.830835  |
| H                                                                | 0.759921  | -0.841163 | 2.421607  | H                                           | 2.674279  | 1.298894  | 0.202528  |
| H                                                                | 1.297881  | 1.616659  | 1.008118  | C                                           | 2.782163  | -0.772283 | 0.811749  |
|                                                                  |           |           |           | H                                           | 0.501503  | 2.986319  | -0.526968 |

|   |           |           |           |                                                |           |           |           |
|---|-----------|-----------|-----------|------------------------------------------------|-----------|-----------|-----------|
| H | -1.192149 | 2.652227  | -0.256069 | H                                              | 0.581350  | -2.402202 | -0.127209 |
| C | -0.114625 | 3.154103  | 1.537082  | C                                              | -1.421246 | -2.619180 | -0.958050 |
| H | -0.539858 | -1.197522 | 1.679098  | H                                              | 0.634889  | -2.863641 | -4.387029 |
| H | -0.374020 | 0.333254  | 2.515411  | H                                              | -0.872526 | -2.963755 | -3.516834 |
| C | -2.262097 | 0.099901  | 1.511270  | H                                              | -2.144240 | -4.176120 | -2.302748 |
| H | 2.841995  | -1.181110 | -0.204847 | H                                              | -2.660774 | -4.383970 | -0.643383 |
| H | 3.803534  | -0.720245 | 1.213212  | H                                              | -0.224506 | -5.234345 | -4.063840 |
| H | 2.230535  | -1.501939 | 1.418535  | H                                              | 1.451652  | -4.926194 | -3.669207 |
| H | 0.886055  | 3.054651  | 1.973158  | H                                              | -1.756319 | -2.363546 | 0.052599  |
| H | -0.343273 | 4.228207  | 1.486922  | H                                              | -2.038666 | -2.016995 | -1.644607 |
| H | -0.819047 | 2.703124  | 2.246492  | 77                                             |           |           |           |
| H | -2.794038 | -0.265549 | 2.400430  | $E_{\text{THF}}, E(\omega\text{B97XD/BSII}) =$ |           |           |           |
| H | -2.509536 | 1.166604  | 1.411218  | -2154.5763014au                                |           |           |           |
| H | -2.710160 | -0.433909 | 0.657541  | Ni                                             | 0.408793  | -0.389650 | -1.798458 |
| C | -0.005079 | 0.901643  | -6.247150 | Si                                             | 0.483627  | 0.665761  | 0.239112  |
| C | 1.278369  | 1.140286  | -2.712911 | C                                              | 2.345279  | 0.458700  | 0.694495  |
| C | 1.832283  | -0.009132 | -3.338002 | C                                              | 0.217414  | 2.591434  | 0.394966  |
| C | 0.286245  | 2.181235  | -5.973991 | C                                              | -0.422325 | 0.016451  | 1.821900  |
| H | -0.462370 | 0.708894  | -7.218625 | K                                              | -2.250689 | 0.992754  | -1.605065 |
| C | 0.274829  | -0.333938 | -5.421668 | H                                              | 2.517422  | 0.842560  | 1.711121  |
| C | 0.318508  | 2.083851  | -3.414377 | H                                              | 2.928552  | 1.103378  | 0.020490  |
| H | 1.936988  | 1.674557  | -2.023439 | C                                              | 2.863235  | -0.979739 | 0.592474  |
| C | 1.676750  | -0.424923 | -4.783687 | H                                              | 0.844645  | 3.064532  | -0.374490 |
| H | 2.815237  | -0.302183 | -2.952675 | H                                              | -0.819062 | 2.874141  | 0.129392  |
| H | 0.056750  | 2.912408  | -6.750225 | C                                              | 0.543805  | 3.208758  | 1.759062  |
| C | 0.868730  | 2.747147  | -4.703435 | H                                              | -0.295177 | -1.073456 | 1.874567  |
| H | 0.137176  | -1.197501 | -6.083411 | H                                              | 0.098487  | 0.419059  | 2.703431  |
| H | -0.470187 | -0.474854 | -4.621001 | C                                              | -1.909579 | 0.366660  | 1.928451  |
| H | -0.602924 | 1.571221  | -3.722086 | H                                              | 2.749423  | -1.363274 | -0.429647 |
| H | 0.020784  | 2.864665  | -2.703314 | H                                              | 3.924263  | -1.063171 | 0.866193  |
| H | 2.018858  | -1.463502 | -4.859045 | H                                              | 2.302461  | -1.655251 | 1.251715  |
| H | 2.373761  | 0.156471  | -5.409157 | H                                              | 1.580131  | 2.998107  | 2.047192  |
| H | 1.963924  | 2.657360  | -4.711026 | H                                              | 0.418610  | 4.301105  | 1.766886  |
| H | 0.659724  | 3.824156  | -4.683819 | H                                              | -0.097653 | 2.801381  | 2.550095  |
| C | 0.799407  | -2.461437 | -2.261230 | H                                              | -2.365497 | 0.024373  | 2.868043  |
| C | -0.687751 | -5.095229 | -1.066038 | H                                              | -2.070863 | 1.453111  | 1.876041  |
| C | 0.262433  | -5.355215 | -1.970956 | H                                              | -2.493760 | -0.101602 | 1.121417  |
| C | 0.052120  | -2.253938 | -1.069842 | C                                              | 0.544461  | 1.472110  | -6.216287 |
| H | 1.864449  | -2.680392 | -2.131402 | C                                              | 1.173664  | 1.224636  | -2.676499 |
| C | 0.197128  | -3.190573 | -3.438345 | C                                              | 1.602565  | 0.037118  | -3.329167 |
| C | -1.799042 | -4.106332 | -1.264272 | C                                              | 0.796208  | 2.683679  | -5.704112 |
| H | -0.648919 | -5.615621 | -0.109242 | H                                              | 0.668675  | 1.386611  | -7.296893 |
| C | 0.425717  | -4.722927 | -3.335008 | C                                              | 0.220410  | 0.165461  | -5.530635 |
| H | 1.016766  | -6.097274 | -1.707978 | C                                              | 0.187884  | 2.243252  | -3.219548 |

|   |           |           |           |                                                |           |           |           |
|---|-----------|-----------|-----------|------------------------------------------------|-----------|-----------|-----------|
| H | 1.912681  | 1.708073  | -2.031673 | H                                              | -5.839023 | -0.938384 | -2.754882 |
| C | 1.412131  | -0.422180 | -4.755886 | O                                              | -3.914682 | -0.340170 | -3.258677 |
| H | 2.556469  | -0.340856 | -2.940239 | 22                                             |           |           |           |
| H | 1.087065  | 3.453812  | -6.421976 | ArF, E( $\omega$ B97XD/BSII) = -562.4747319 au |           |           |           |
| C | 0.734148  | 3.192876  | -4.293084 | C                                              | -1.509996 | 0.971856  | -0.017625 |
| H | -0.083677 | -0.550345 | -6.304906 | C                                              | -0.173796 | 1.027613  | -0.439836 |
| H | -0.633175 | 0.243960  | -4.848727 | C                                              | 0.515049  | 2.237022  | -0.472832 |
| H | -0.710183 | 1.763872  | -3.632031 | C                                              | -0.117553 | 3.416012  | -0.080820 |
| H | -0.140541 | 2.863822  | -2.373390 | C                                              | -1.445491 | 3.374822  | 0.342599  |
| H | 1.340263  | -1.517625 | -4.758744 | C                                              | -2.134659 | 2.165757  | 0.372217  |
| H | 2.325574  | -0.188245 | -5.325958 | C                                              | -2.242614 | -0.314061 | 0.016524  |
| H | 1.738147  | 3.529518  | -3.990321 | C                                              | -2.091853 | -1.257895 | -1.010267 |
| H | 0.119851  | 4.108295  | -4.304662 | C                                              | -2.776188 | -2.469118 | -0.985466 |
| C | 0.154793  | -2.250002 | -2.397908 | C                                              | -3.623783 | -2.735376 | 0.081412  |
| C | -1.417819 | -4.807876 | -1.251244 | C                                              | -3.801538 | -1.827883 | 1.117305  |
| C | -0.826745 | -5.014386 | -2.433211 | C                                              | -3.107580 | -0.622915 | 1.077221  |
| C | -0.233935 | -2.106179 | -1.037260 | H                                              | 0.335689  | 0.108560  | -0.718832 |
| H | 1.143457  | -2.678112 | -2.590795 | H                                              | 1.552832  | 2.256530  | -0.796030 |
| C | -0.867233 | -2.614072 | -3.447247 | H                                              | 0.420138  | 4.360223  | -0.105130 |
| C | -2.348279 | -3.666549 | -0.964324 | H                                              | -1.950659 | 4.289805  | 0.641700  |
| H | -1.202001 | -5.495041 | -0.433405 | H                                              | -3.178481 | 2.146962  | 0.675750  |
| C | -0.949633 | -4.149525 | -3.667664 | H                                              | -1.448028 | -1.029637 | -1.855467 |
| H | -0.168908 | -5.878537 | -2.526751 | H                                              | -2.671756 | -3.199803 | -1.781093 |
| H | 0.498802  | -2.429906 | -0.295118 | H                                              | -4.464640 | -2.077617 | 1.939328  |
| C | -1.660974 | -2.324764 | -0.548720 | H                                              | -3.219354 | 0.081262  | 1.897278  |
| H | -0.637112 | -2.157913 | -4.417665 | F                                              | -4.289471 | -3.903190 | 0.112996  |
| H | -1.844561 | -2.212084 | -3.156968 | 20                                             |           |           |           |
| H | -2.951187 | -3.490064 | -1.862912 | cod, E( $\omega$ B97XD/BSII) = -311.9957903 au |           |           |           |
| H | -3.060433 | -3.952579 | -0.178892 | C                                              | 0.639700  | -2.435459 | -2.373398 |
| H | -1.881245 | -4.392271 | -4.207226 | C                                              | -0.954015 | -5.196201 | -1.242371 |
| H | -0.138778 | -4.431356 | -4.351804 | C                                              | 0.072993  | -5.525091 | -2.034022 |
| H | -1.655443 | -2.249666 | 0.542787  | C                                              | 0.018927  | -2.190398 | -1.214085 |
| H | -2.339757 | -1.530103 | -0.888308 | H                                              | 1.586924  | -1.918674 | -2.533060 |
| C | -4.819267 | -2.373963 | -4.036836 | C                                              | 0.234981  | -3.367653 | -3.487909 |
| C | -4.619857 | -1.447320 | -5.238653 | C                                              | -1.861669 | -3.993609 | -1.314789 |
| C | -3.654465 | -0.406656 | -4.677045 | H                                              | -1.152970 | -5.866832 | -0.405455 |
| C | -4.838551 | -1.376344 | -2.887053 | C                                              | 0.643363  | -4.829940 | -3.239791 |
| H | -5.734347 | -2.970602 | -4.092109 | H                                              | 0.598073  | -6.448700 | -1.783236 |
| H | -3.967536 | -3.055521 | -3.933843 | H                                              | 0.505922  | -1.475311 | -0.548422 |
| H | -5.570531 | -0.981134 | -5.523539 | C                                              | -1.265128 | -2.738571 | -0.654247 |
| H | -4.212365 | -1.957332 | -6.116100 | H                                              | 0.726875  | -3.039526 | -4.412325 |
| H | -2.612107 | -0.710697 | -4.821968 | H                                              | -0.836883 | -3.307267 | -3.691089 |
| H | -3.794239 | 0.592255  | -5.105443 | H                                              | -2.153574 | -3.772444 | -2.344377 |
| H | -4.512151 | -1.801625 | -1.932492 | H                                              | -2.796098 | -4.230375 | -0.790464 |



|                                              |           |           |           |                                              |           |           |           |
|----------------------------------------------|-----------|-----------|-----------|----------------------------------------------|-----------|-----------|-----------|
| H                                            | 0.401738  | -5.423685 | -4.136278 | C                                            | -0.499387 | -4.306089 | -2.784002 |
| H                                            | 1.739716  | -4.872505 | -3.157657 | H                                            | -0.656154 | -3.547649 | -0.772936 |
| H                                            | -1.094008 | -2.958223 | 0.410146  | C                                            | 0.171524  | -4.221134 | -4.003797 |
| H                                            | -2.022944 | -1.938422 | -0.661792 | H                                            | 1.775277  | -3.265633 | -5.082795 |
| 66                                           |           |           |           | H                                            | -1.341373 | -4.984786 | -2.670942 |
| F, E( $\omega$ B97XD/BSII) = -2172.588817 au |           |           |           | H                                            | -0.138161 | -4.837235 | -4.844057 |
| Ni                                           | -0.154132 | 0.579539  | -0.536455 | Si                                           | -1.719713 | 0.442623  | 1.181429  |
| K                                            | 0.356266  | 2.795367  | 1.790351  | C                                            | -3.430034 | 1.339703  | 1.054289  |
| H                                            | 1.299215  | -3.321704 | 0.740495  | C                                            | -2.095411 | -1.432388 | 0.937693  |
| C                                            | 1.464896  | -2.260060 | 0.577125  | C                                            | -1.560233 | 0.577537  | 3.141156  |
| C                                            | 1.774217  | 0.506981  | 0.203323  | H                                            | -4.142829 | 0.824283  | 1.714368  |
| C                                            | 2.004186  | -0.120749 | 1.458637  | H                                            | -3.833311 | 1.228279  | 0.039567  |
| C                                            | 1.856528  | -1.451651 | 1.683580  | C                                            | -3.399004 | 2.824100  | 1.436180  |
| H                                            | 2.263068  | 1.473431  | 0.048855  | H                                            | -2.235564 | -1.596158 | -0.140526 |
| H                                            | 1.990817  | -1.869949 | 2.674164  | H                                            | -1.165910 | -1.962160 | 1.186017  |
| C                                            | -0.580409 | 0.407035  | -2.529396 | C                                            | -3.272364 | -2.022638 | 1.719392  |
| C                                            | 0.355312  | 0.971253  | -3.585172 | H                                            | -1.427042 | 1.620110  | 3.488300  |
| C                                            | -1.039494 | 3.587058  | -1.704703 | H                                            | -2.573746 | 0.330349  | 3.492154  |
| C                                            | 1.198382  | 2.223938  | -3.236455 | C                                            | -0.560809 | -0.323704 | 3.872393  |
| C                                            | -0.420091 | 4.128488  | -2.959917 | H                                            | -2.673050 | 3.383251  | 0.825771  |
| C                                            | 0.558291  | 3.521859  | -3.638598 | H                                            | -4.368723 | 3.322254  | 1.298925  |
| H                                            | -0.220849 | 1.181363  | -4.499990 | H                                            | -3.124640 | 2.959268  | 2.492000  |
| H                                            | 1.391572  | 2.212376  | -2.154698 | H                                            | -4.219343 | -1.541664 | 1.446561  |
| H                                            | -0.264809 | 3.154405  | -1.050875 | H                                            | -3.390888 | -3.099713 | 1.534604  |
| H                                            | -0.855424 | 5.041367  | -3.367200 | H                                            | -3.143694 | -1.893741 | 2.801575  |
| H                                            | -0.714948 | -0.669431 | -2.665912 | H                                            | -0.721788 | -0.318318 | 4.959777  |
| H                                            | 1.042331  | 0.160360  | -3.857852 | H                                            | -0.649188 | -1.361546 | 3.532451  |
| H                                            | -1.511574 | 4.409527  | -1.150429 | H                                            | 0.475948  | -0.023453 | 3.696445  |
| H                                            | 2.175016  | 2.143771  | -3.729681 | 66                                           |           |           |           |
| H                                            | 0.891822  | 3.962875  | -4.578258 | G, E( $\omega$ B97XD/BSII) = -2172.590058 au |           |           |           |
| C                                            | -1.634302 | 1.032568  | -1.839566 | Ni                                           | -0.115348 | 0.459144  | 0.009280  |
| H                                            | -2.477780 | 0.373222  | -1.617174 | K                                            | 0.799614  | 2.246443  | 2.407569  |
| C                                            | -2.089074 | 2.477579  | -1.958360 | H                                            | 0.285745  | -3.947902 | 0.298014  |
| H                                            | -2.517520 | 2.631191  | -2.961302 | C                                            | 0.716339  | -2.960394 | 0.151184  |
| H                                            | -2.914621 | 2.618181  | -1.256645 | C                                            | 1.731122  | -0.376248 | -0.277111 |
| F                                            | 2.335829  | 0.725716  | 2.491857  | C                                            | 1.101447  | -0.698811 | 0.978557  |
| C                                            | 1.342559  | -1.747241 | -0.696838 | C                                            | 0.665283  | -2.056210 | 1.172773  |
| C                                            | 1.575254  | -0.339897 | -0.939467 | H                                            | 2.434313  | 0.454861  | -0.310923 |
| H                                            | 1.971348  | -0.042526 | -1.904826 | H                                            | 0.246822  | -2.332840 | 2.132910  |
| C                                            | 0.965864  | -2.615052 | -1.832567 | C                                            | -0.294792 | 0.828968  | -1.968614 |
| C                                            | 1.632181  | -2.539564 | -3.064816 | C                                            | 0.832082  | 1.403656  | -2.809290 |
| C                                            | -0.107383 | -3.510272 | -1.710110 | C                                            | -0.452178 | 3.890251  | -0.698256 |
| C                                            | 1.240991  | -3.335327 | -4.138316 | C                                            | 1.752879  | 2.485984  | -2.195152 |
| H                                            | 2.476280  | -1.863519 | -3.176279 | C                                            | 0.339472  | 4.518363  | -1.807124 |

|    |           |           |           |                                              |           |           |           |
|----|-----------|-----------|-----------|----------------------------------------------|-----------|-----------|-----------|
| C  | 1.311706  | 3.892376  | -2.475908 | H                                            | -3.637937 | 3.850514  | 2.141847  |
| H  | 0.407334  | 1.801163  | -3.744832 | H                                            | -2.561356 | 3.042581  | 3.277691  |
| H  | 1.802629  | 2.308904  | -1.113057 | H                                            | -4.616196 | -0.907132 | 2.148645  |
| H  | 0.202839  | 3.270421  | -0.066796 | H                                            | -4.328388 | -2.570429 | 1.628597  |
| H  | 0.043748  | 5.521723  | -2.113457 | H                                            | -3.462586 | -1.916505 | 3.022277  |
| H  | -0.541978 | -0.187526 | -2.295190 | H                                            | -0.796447 | -0.867902 | 5.256022  |
| H  | 1.460190  | 0.557101  | -3.105577 | H                                            | -1.174601 | -1.837412 | 3.831214  |
| H  | -0.869375 | 4.680030  | -0.060456 | H                                            | 0.278289  | -0.840022 | 3.847858  |
| H  | 2.769634  | 2.345023  | -2.581517 | 66                                           |           |           |           |
| H  | 1.788606  | 4.403261  | -3.312376 | H, E( $\omega$ B97XD/BSII) = -2172.586534 au |           |           |           |
| C  | -1.332969 | 1.481932  | -1.285618 | Ni                                           | -0.659838 | 0.507399  | 0.198378  |
| H  | -2.271380 | 0.921831  | -1.249814 | C                                            | 1.873290  | -2.275539 | 0.356184  |
| C  | -1.597288 | 2.974455  | -1.188362 | C                                            | 0.779654  | 0.268922  | 1.319625  |
| H  | -1.925063 | 3.332809  | -2.176630 | C                                            | 0.636673  | -0.985092 | 2.053184  |
| H  | -2.453498 | 3.112377  | -0.524367 | C                                            | 1.138394  | -2.177133 | 1.582411  |
| F  | 1.732230  | -0.131331 | 2.145660  | H                                            | 0.979109  | -3.077586 | 2.173021  |
| C  | 1.325343  | -2.649970 | -1.109691 | C                                            | -1.506828 | -0.356517 | -1.423414 |
| C  | 1.872026  | -1.396075 | -1.265428 | C                                            | -0.613395 | -0.941530 | -2.502865 |
| H  | 2.461542  | -1.177423 | -2.152468 | C                                            | -0.815753 | 2.621261  | -2.611193 |
| C  | 1.409791  | -3.659096 | -2.182521 | C                                            | 0.389699  | -0.068362 | -3.268475 |
| C  | 1.266833  | -3.284275 | -3.528989 | C                                            | -0.741996 | 2.041969  | -3.993202 |
| C  | 1.634900  | -5.016000 | -1.898161 | C                                            | -0.233153 | 0.842863  | -4.284224 |
| C  | 1.360617  | -4.224581 | -4.551178 | H                                            | -1.276840 | -1.426966 | -3.237956 |
| H  | 1.052415  | -2.244885 | -3.766960 | H                                            | 0.967121  | 0.510519  | -2.540997 |
| C  | 1.720589  | -5.958481 | -2.919351 | H                                            | 0.040415  | 2.317579  | -1.993863 |
| H  | 1.771513  | -5.329037 | -0.865981 | H                                            | -1.215376 | 2.623402  | -4.785286 |
| C  | 1.586619  | -5.568195 | -4.251930 | H                                            | -2.003246 | -1.187212 | -0.905632 |
| H  | 1.240595  | -3.909248 | -5.585050 | H                                            | -0.054168 | -1.755746 | -2.023547 |
| H  | 1.902752  | -7.002070 | -2.673540 | H                                            | -0.787280 | 3.716691  | -2.670314 |
| H  | 1.652889  | -6.304595 | -5.048767 | H                                            | 1.099951  | -0.739432 | -3.769448 |
| Si | -1.793106 | 0.422039  | 1.615385  | H                                            | -0.298628 | 0.472847  | -5.307635 |
| C  | -3.199671 | 1.749036  | 1.635937  | C                                            | -2.157425 | 0.858965  | -1.201729 |
| C  | -2.712128 | -1.186431 | 1.101195  | H                                            | -3.087924 | 0.764096  | -0.642095 |
| C  | -1.579115 | 0.281719  | 3.558497  | C                                            | -2.105481 | 2.205458  | -1.888229 |
| H  | -4.033191 | 1.340802  | 2.226133  | H                                            | -2.943261 | 2.252994  | -2.603392 |
| H  | -3.593108 | 1.867639  | 0.617962  | H                                            | -2.329892 | 2.953515  | -1.121963 |
| C  | -2.823004 | 3.117114  | 2.213022  | C                                            | 1.988236  | -1.106309 | -0.399910 |
| H  | -3.110941 | -0.996307 | 0.093089  | C                                            | 1.416102  | 0.115847  | 0.006938  |
| H  | -1.965863 | -1.979069 | 0.966416  | H                                            | 1.659074  | 1.018500  | -0.554984 |
| C  | -3.837584 | -1.669346 | 2.021428  | K                                            | 3.518653  | -0.299139 | 2.117405  |
| H  | -1.213501 | 1.234732  | 3.985444  | H                                            | 0.100844  | -0.962238 | 2.998849  |
| H  | -2.612440 | 0.221712  | 3.933192  | F                                            | 1.453508  | 1.287304  | 2.149451  |
| C  | -0.771058 | -0.871320 | 4.157378  | H                                            | 2.492299  | -1.145045 | -1.364531 |
| H  | -1.964026 | 3.557750  | 1.685410  | C                                            | 2.461376  | -3.551896 | -0.086958 |

|                                               |           |           |           |    |           |           |           |
|-----------------------------------------------|-----------|-----------|-----------|----|-----------|-----------|-----------|
| C                                             | 3.673366  | -3.586403 | -0.802099 | H  | -2.230255 | 3.454348  | 3.260046  |
| C                                             | 1.842672  | -4.783425 | 0.195088  | H  | 0.754428  | 3.108597  | -1.527528 |
| C                                             | 4.234767  | -4.788855 | -1.222323 | H  | 2.149897  | 3.034959  | 0.327098  |
| H                                             | 4.187507  | -2.653248 | -1.025425 | H  | -3.094269 | 1.634142  | 1.954309  |
| C                                             | 2.409546  | -5.987186 | -0.214150 | H  | 1.786554  | 2.466119  | 2.513926  |
| H                                             | 0.887159  | -4.793379 | 0.713075  | H  | 0.114912  | 3.867704  | 3.513917  |
| C                                             | 3.609217  | -5.999996 | -0.926265 | C  | -1.099722 | 2.500595  | -0.763315 |
| H                                             | 5.171747  | -4.780291 | -1.774667 | H  | -1.464526 | 2.711338  | -1.772219 |
| H                                             | 1.901486  | -6.921743 | 0.011874  | C  | -2.249617 | 2.615922  | 0.220115  |
| H                                             | 4.048737  | -6.940160 | -1.248556 | H  | -2.477404 | 3.685352  | 0.354144  |
| Si                                            | -1.867706 | 1.383682  | 1.923367  | H  | -3.128605 | 2.184822  | -0.264361 |
| C                                             | -3.003013 | -0.038636 | 2.556307  | Si | -1.720447 | -0.383209 | -2.087199 |
| C                                             | -0.979992 | 1.989484  | 3.522984  | C  | -1.451053 | -0.162317 | -3.976408 |
| C                                             | -3.040567 | 2.846668  | 1.501913  | C  | -1.891017 | -2.318059 | -1.833896 |
| H                                             | -3.550095 | 0.342177  | 3.431785  | C  | -3.570537 | 0.139253  | -1.885583 |
| H                                             | -2.355294 | -0.844100 | 2.932589  | H  | -2.314455 | -0.580067 | -4.514295 |
| C                                             | -3.999177 | -0.618988 | 1.550759  | H  | -0.573049 | -0.744836 | -4.279243 |
| H                                             | -0.362240 | 1.170032  | 3.913457  | C  | -1.246388 | 1.302627  | -4.376727 |
| H                                             | -0.262058 | 2.767181  | 3.234779  | H  | -0.900602 | -2.775541 | -1.697942 |
| C                                             | -1.900859 | 2.511703  | 4.631390  | H  | -2.453713 | -2.513986 | -0.901779 |
| H                                             | -3.626824 | 2.611368  | 0.604102  | C  | -2.622800 | -3.048748 | -2.965357 |
| H                                             | -3.775204 | 2.941718  | 2.315600  | H  | -3.637959 | 1.228192  | -2.012332 |
| C                                             | -2.302729 | 4.177420  | 1.315646  | H  | -4.132877 | -0.283517 | -2.731392 |
| H                                             | -3.480656 | -1.085143 | 0.704428  | C  | -4.253891 | -0.280691 | -0.581120 |
| H                                             | -4.643452 | -1.388008 | 1.999285  | H  | -0.360100 | 1.716369  | -3.880686 |
| H                                             | -4.659323 | 0.157791  | 1.143496  | H  | -1.108333 | 1.423152  | -5.459952 |
| H                                             | -2.603513 | 1.742470  | 4.974549  | H  | -2.105330 | 1.923055  | -4.087714 |
| H                                             | -1.334914 | 2.846814  | 5.512592  | H  | -2.071627 | -2.961077 | -3.907953 |
| H                                             | -2.500872 | 3.365015  | 4.292851  | H  | -2.752834 | -4.120329 | -2.757480 |
| H                                             | -2.970301 | 4.987168  | 0.990196  | H  | -3.619782 | -2.624040 | -3.134060 |
| H                                             | -1.828429 | 4.501140  | 2.250173  | H  | -5.257601 | 0.151257  | -0.466182 |
| H                                             | -1.499581 | 4.089396  | 0.571633  | H  | -4.371191 | -1.371025 | -0.527892 |
| 66                                            |           |           |           | H  | -3.677808 | 0.031332  | 0.302616  |
| I, E( $\omega$ B97XD/BSII) = -2172.5896425 au |           |           |           | Ni | 0.001939  | 0.812166  | -1.081374 |
| K                                             | -0.828091 | -1.436394 | 0.957039  | C  | 1.384414  | -0.388442 | -1.889730 |
| C                                             | 0.273200  | 2.765800  | -0.603754 | F  | 1.480667  | -0.032453 | -3.219651 |
| C                                             | 1.096576  | 3.189510  | 0.597095  | C  | 1.994264  | 0.527055  | -0.951690 |
| C                                             | -2.108853 | 1.977429  | 1.615483  | C  | 1.498928  | -1.798699 | -1.650237 |
| C                                             | 0.847092  | 2.484792  | 1.946644  | C  | 2.358028  | -0.009291 | 0.317371  |
| C                                             | -1.523624 | 2.898241  | 2.644245  | H  | 2.506752  | 1.413948  | -1.317449 |
| C                                             | -0.215838 | 3.128929  | 2.783866  | C  | 1.855440  | -2.265246 | -0.415001 |
| H                                             | 0.989074  | 4.276179  | 0.743226  | C  | 2.229351  | -1.355551 | 0.638336  |
| H                                             | 0.594580  | 1.439970  | 1.723938  | H  | 2.823081  | 0.659929  | 1.036829  |
| H                                             | -1.477782 | 1.085233  | 1.496126  | H  | 1.271885  | -2.471972 | -2.471670 |

|                                               |           |           |           |                                              |           |           |           |
|-----------------------------------------------|-----------|-----------|-----------|----------------------------------------------|-----------|-----------|-----------|
| H                                             | 1.870701  | -3.337274 | -0.232687 | H                                            | -2.381624 | -3.085659 | 0.651239  |
| C                                             | 2.495804  | -1.850259 | 2.005903  | C                                            | -2.342159 | -3.905081 | -1.322302 |
| C                                             | 2.214393  | -1.046547 | 3.129442  | H                                            | -4.024891 | 0.287196  | -0.866512 |
| C                                             | 2.988476  | -3.146988 | 2.244398  | H                                            | -4.201233 | -1.241158 | -1.691055 |
| C                                             | 2.419755  | -1.514739 | 4.425261  | C                                            | -4.561718 | -1.356369 | 0.427304  |
| H                                             | 1.825460  | -0.041638 | 2.983223  | H                                            | -0.678338 | 0.974719  | -2.858220 |
| C                                             | 3.188154  | -3.615690 | 3.539998  | H                                            | -1.298347 | 0.312268  | -4.378826 |
| H                                             | 3.250185  | -3.783795 | 1.403817  | H                                            | -2.422605 | 0.851164  | -3.123829 |
| C                                             | 2.903014  | -2.805413 | 4.639856  | H                                            | -1.734914 | -3.881642 | -2.233358 |
| H                                             | 2.193660  | -0.868398 | 5.270125  | H                                            | -2.352218 | -4.942703 | -0.961038 |
| H                                             | 3.581151  | -4.618236 | 3.691114  | H                                            | -3.368905 | -3.647444 | -1.610176 |
| H                                             | 3.060307  | -3.173660 | 5.650030  | H                                            | -5.619967 | -1.063286 | 0.429675  |
| 66                                            |           |           |           | H                                            | -4.532039 | -2.452548 | 0.435736  |
| TSI/L, E( $\omega$ B97XD/BSII) = -2172.550352 |           |           |           | H                                            | -4.143917 | -1.013564 | 1.387098  |
| au                                            |           |           |           | Ni                                           | -0.500810 | 0.589821  | -0.031315 |
| K                                             | -1.014045 | -1.656983 | 2.425856  | C                                            | 1.019513  | -0.535626 | 0.306670  |
| C                                             | -0.823155 | 2.618609  | -0.166367 | F                                            | 1.443500  | 0.579659  | -0.696629 |
| C                                             | 0.273890  | 3.407427  | 0.520535  | C                                            | 1.496403  | -0.167930 | 1.617139  |
| C                                             | -2.156637 | 2.065853  | 2.822673  | C                                            | 1.387065  | -1.855079 | -0.124096 |
| C                                             | 0.413908  | 3.407949  | 2.047766  | C                                            | 1.942370  | -1.128232 | 2.513840  |
| C                                             | -1.828418 | 3.494899  | 3.144594  | H                                            | 1.500517  | 0.880559  | 1.891855  |
| C                                             | -0.699290 | 4.101914  | 2.772767  | C                                            | 1.812062  | -2.794335 | 0.788976  |
| H                                             | 0.172471  | 4.451331  | 0.182702  | C                                            | 2.028824  | -2.493339 | 2.164270  |
| H                                             | 0.491553  | 2.372028  | 2.394402  | H                                            | 2.213865  | -0.810751 | 3.520060  |
| H                                             | -1.246458 | 1.447014  | 2.808490  | H                                            | 1.229493  | -2.123976 | -1.164133 |
| H                                             | -2.610599 | 4.071508  | 3.638143  | H                                            | 2.001217  | -3.807021 | 0.438344  |
| H                                             | -0.726517 | 2.741913  | -1.250356 | C                                            | 2.333655  | -3.540775 | 3.149287  |
| H                                             | 1.223186  | 3.052956  | 0.092687  | C                                            | 3.136555  | -3.293766 | 4.280166  |
| H                                             | -2.821107 | 1.656936  | 3.596649  | C                                            | 1.793590  | -4.836230 | 3.013863  |
| H                                             | 1.369775  | 3.887509  | 2.293632  | C                                            | 3.375740  | -4.284108 | 5.227835  |
| H                                             | -0.574932 | 5.165375  | 2.975581  | H                                            | 3.605710  | -2.320382 | 4.398671  |
| C                                             | -2.022764 | 2.021482  | 0.199550  | C                                            | 2.043521  | -5.829947 | 3.956083  |
| H                                             | -2.660607 | 1.823800  | -0.663521 | H                                            | 1.156082  | -5.060554 | 2.160789  |
| C                                             | -2.850320 | 1.938293  | 1.461209  | C                                            | 2.832073  | -5.560628 | 5.075099  |
| H                                             | -3.635016 | 2.709817  | 1.400431  | H                                            | 4.007478  | -4.061921 | 6.084929  |
| H                                             | -3.378659 | 0.978893  | 1.415404  | H                                            | 1.610946  | -6.818649 | 3.819583  |
| Si                                            | -1.884270 | -1.060975 | -0.791765 | H                                            | 3.025512  | -6.334511 | 5.813092  |
| C                                             | -1.444629 | -1.052438 | -2.663826 | 66                                           |           |           |           |
| C                                             | -1.791097 | -2.934770 | -0.270154 | TSI/M, E( $\omega$ B97XD/BSII) = -2172.55481 |           |           |           |
| C                                             | -3.801754 | -0.782970 | -0.773861 | au                                           |           |           |           |
| H                                             | -2.153592 | -1.707328 | -3.191394 | H                                            | 3.494334  | -0.327939 | 3.006991  |
| H                                             | -0.449951 | -1.499537 | -2.797705 | H                                            | 1.681990  | -0.128360 | -1.582321 |
| C                                             | -1.463021 | 0.344375  | -3.293617 | H                                            | 3.379106  | 1.806345  | 1.929363  |
| H                                             | -0.755683 | -3.214576 | -0.037119 | Ni                                           | 0.270001  | 0.993616  | 0.029804  |

|   |           |           |           |                                  |              |           |           |
|---|-----------|-----------|-----------|----------------------------------|--------------|-----------|-----------|
| C | 1.851270  | -0.101043 | -0.505171 | H                                | 0.637250     | 1.681470  | -2.691290 |
| C | 2.403468  | 1.155827  | 0.056701  | H                                | 0.730468     | 3.033561  | -3.830011 |
| C | 2.947896  | 0.950722  | 1.419943  | H                                | 2.186787     | 2.463318  | -2.986450 |
| C | 3.032619  | -0.279905 | 2.019609  | C                                | 0.762900     | 3.743450  | 1.514534  |
| F | 3.504492  | 1.555519  | -0.872081 | H                                | -0.278068    | 3.408472  | 1.489762  |
| C | -3.864656 | 1.541241  | -2.053098 | H                                | 1.235932     | 3.205127  | 2.351947  |
| C | -1.413712 | 0.125774  | -0.014814 | C                                | 0.824216     | 5.254512  | 1.772681  |
| C | -1.610474 | 1.493644  | 0.369725  | H                                | 0.406161     | 5.820092  | 0.930509  |
| C | -4.033144 | 0.216075  | -1.968848 | H                                | 0.251953     | 5.534715  | 2.667282  |
| H | -4.770176 | 2.120347  | -2.241907 | H                                | 1.852475     | 5.601565  | 1.920836  |
| C | -2.631569 | 2.386644  | -1.847664 | C                                | 3.248862     | 4.177842  | -0.147239 |
| C | -1.605744 | -0.512658 | -1.378001 | H                                | 3.687475     | 4.009373  | -1.136922 |
| H | -1.573623 | -0.628241 | 0.775295  | H                                | 2.870211     | 5.212262  | -0.158060 |
| C | -2.326271 | 2.615932  | -0.358688 | C                                | 4.330461     | 4.041232  | 0.922389  |
| H | -1.772900 | 1.613881  | 1.452982  | H                                | 5.104854     | 4.811684  | 0.812177  |
| H | -5.052269 | -0.146328 | -2.121058 | H                                | 3.922169     | 4.138189  | 1.937863  |
| C | -3.051014 | -0.892156 | -1.718020 | H                                | 4.820934     | 3.066390  | 0.844559  |
| H | -2.807221 | 3.362091  | -2.318000 | Si                               | 1.650266     | 3.135518  | -0.072841 |
| H | -1.749139 | 1.974356  | -2.343708 | 66                               |              |           |           |
| H | -1.190954 | 0.110083  | -2.175293 | TSG/J, E( $\omega$ B97XD/BSII) = | -2172.565736 |           |           |
| H | -1.000745 | -1.428982 | -1.385359 | au                               |              |           |           |
| H | -1.743731 | 3.540212  | -0.244482 | Ni                               | -0.409160    | 0.271978  | 0.039184  |
| H | -3.283797 | 2.812358  | 0.149926  | K                                | 1.054911     | 1.054351  | 3.002663  |
| H | -3.449326 | -1.524042 | -0.907136 | H                                | 1.034000     | -4.383569 | 1.216624  |
| H | -3.044001 | -1.545376 | -2.606089 | C                                | 1.007222     | -3.477735 | 0.614024  |
| K | 0.192702  | -0.171178 | 2.835644  | C                                | 0.929182     | -1.161090 | -0.903108 |
| C | 1.923757  | -1.321875 | 0.175999  | C                                | 0.761458     | -1.073118 | 0.504301  |
| H | 1.555703  | -2.201814 | -0.349414 | C                                | 0.919837     | -2.258781 | 1.257734  |
| C | 2.462419  | -1.466396 | 1.462620  | H                                | 1.212750     | -0.288459 | -1.480765 |
| C | 2.322389  | -2.698030 | 2.247328  | H                                | 0.895678     | -2.232370 | 2.342343  |
| C | 1.242080  | -3.584982 | 2.029156  | C                                | -0.843029    | 1.465321  | -1.596036 |
| C | 3.208135  | -3.022649 | 3.297748  | C                                | 0.318326     | 1.794593  | -2.520816 |
| C | 1.066669  | -4.727079 | 2.806357  | C                                | 0.629552     | 3.505162  | 0.582503  |
| H | 0.527758  | -3.369575 | 1.236215  | C                                | 1.678490     | 2.223683  | -1.924910 |
| C | 3.021787  | -4.157223 | 4.081396  | C                                | 1.288232     | 4.268781  | -0.528849 |
| H | 4.076557  | -2.393554 | 3.475185  | C                                | 1.747170     | 3.696752  | -1.643925 |
| C | 1.950121  | -5.020643 | 3.845628  | H                                | -0.021901    | 2.578589  | -3.216428 |
| H | 0.226817  | -5.387929 | 2.602322  | H                                | 1.888995     | 1.641874  | -1.017847 |
| H | 3.732634  | -4.379236 | 4.874337  | H                                | 1.115638     | 2.525945  | 0.698522  |
| H | 1.811375  | -5.909248 | 4.455349  | H                                | 1.321315     | 5.353785  | -0.429914 |
| C | 0.820915  | 3.621030  | -1.721669 | H                                | -1.591707    | 0.869586  | -2.125575 |
| H | 1.194205  | 4.623906  | -1.977349 | H                                | 0.478386     | 0.905352  | -3.144606 |
| H | -0.259494 | 3.717563  | -1.589696 | H                                | 0.756834     | 4.063458  | 1.522417  |
| C | 1.113831  | 2.652587  | -2.874891 | H                                | 2.461428     | 1.961208  | -2.646815 |

|    |           |           |           |                                               |           |           |           |
|----|-----------|-----------|-----------|-----------------------------------------------|-----------|-----------|-----------|
| H  | 2.150703  | 4.330754  | -2.433718 | TSH/J, E( $\omega$ B97XD/BSII) = -2172.577222 |           |           |           |
| C  | -1.325000 | 2.066043  | -0.433984 | au                                            |           |           |           |
| H  | -2.387473 | 1.879966  | -0.266662 | C                                             | 2.059453  | 1.956253  | -0.186138 |
| C  | -0.877986 | 3.285437  | 0.345375  | C                                             | 1.200311  | 3.229123  | -0.175684 |
| H  | -1.287908 | 4.179293  | -0.151541 | H                                             | 1.406668  | 3.800101  | -1.095403 |
| H  | -1.385607 | 3.231656  | 1.313900  | H                                             | 0.141173  | 2.939144  | -0.253036 |
| F  | 2.017653  | 0.241744  | 0.988915  | C                                             | 3.107034  | 2.027344  | 2.954027  |
| C  | 0.988778  | -3.595003 | -0.796605 | C                                             | 3.455852  | 3.324156  | 2.208216  |
| C  | 0.976958  | -2.411604 | -1.535077 | H                                             | 4.183188  | 3.873221  | 2.819138  |
| H  | 1.110660  | -2.450685 | -2.614203 | H                                             | 3.976740  | 3.087414  | 1.279527  |
| C  | 1.039608  | -4.912782 | -1.457823 | C                                             | 2.151894  | 1.080652  | 2.270119  |
| C  | 0.322959  | -5.148180 | -2.643198 | H                                             | 1.587888  | 0.453358  | 2.966827  |
| C  | 1.799309  | -5.969917 | -0.929692 | C                                             | 1.735276  | 1.028258  | 0.956364  |
| C  | 0.368322  | -6.386467 | -3.277562 | H                                             | 0.865250  | 0.391197  | 0.769148  |
| H  | -0.297068 | -4.354238 | -3.052641 | C                                             | 2.255833  | 4.207558  | 1.975138  |
| C  | 1.837998  | -7.211493 | -1.558492 | H                                             | 2.106910  | 4.977379  | 2.733763  |
| H  | 2.388601  | -5.805216 | -0.030950 | C                                             | 1.335423  | 4.153656  | 1.004142  |
| C  | 1.124342  | -7.427006 | -2.737462 | H                                             | 0.542407  | 4.902527  | 1.052778  |
| H  | -0.200863 | -6.543798 | -4.190810 | Ni                                            | 3.155459  | -0.566298 | 1.309654  |
| H  | 2.439030  | -8.011254 | -1.131957 | H                                             | 4.034409  | 1.484425  | 3.191602  |
| H  | 1.156383  | -8.395714 | -3.229611 | H                                             | 2.664629  | 2.290236  | 3.925683  |
| Si | -1.874621 | -0.190936 | 1.712583  | H                                             | 1.876655  | 1.417964  | -1.123382 |
| C  | -3.140391 | -1.263976 | 0.748761  | H                                             | 3.115621  | 2.214270  | -0.200919 |
| C  | -1.497595 | -1.331167 | 3.240374  | K                                             | 3.328870  | -5.398680 | 1.535577  |
| C  | -2.916569 | 1.223958  | 2.518583  | H                                             | 0.290321  | -3.521270 | 2.736603  |
| H  | -3.876911 | -1.653772 | 1.467173  | C                                             | 1.362329  | -3.327067 | 2.720454  |
| H  | -2.587727 | -2.134102 | 0.367675  | C                                             | 4.082709  | -2.692494 | 2.711904  |
| C  | -3.869788 | -0.570808 | -0.403649 | C                                             | 3.324467  | -2.373025 | 1.522148  |
| H  | -1.210839 | -2.302460 | 2.820470  | C                                             | 1.902925  | -2.664447 | 1.621825  |
| H  | -0.617822 | -1.009436 | 3.825957  | H                                             | 5.135990  | -2.430095 | 2.736071  |
| C  | -2.668672 | -1.540135 | 4.208926  | H                                             | 1.256128  | -2.405574 | 0.785295  |
| H  | -3.260732 | 1.928295  | 1.750952  | F                                             | 3.902268  | -3.393735 | 0.279773  |
| H  | -3.828154 | 0.749949  | 2.911070  | C                                             | 3.510866  | -3.332429 | 3.800457  |
| C  | -2.239673 | 2.000636  | 3.652602  | H                                             | 4.141836  | -3.560247 | 4.658879  |
| H  | -3.163121 | -0.262788 | -1.182338 | C                                             | 2.143373  | -3.707817 | 3.832917  |
| H  | -4.610598 | -1.228540 | -0.876884 | C                                             | 1.569742  | -4.454266 | 4.965836  |
| H  | -4.401691 | 0.328097  | -0.065361 | C                                             | 0.534451  | -5.389117 | 4.771853  |
| H  | -3.558874 | -1.903709 | 3.683750  | C                                             | 2.043418  | -4.282302 | 6.280017  |
| H  | -2.426855 | -2.280724 | 4.983271  | C                                             | -0.002128 | -6.111478 | 5.834295  |
| H  | -2.956197 | -0.615084 | 4.721947  | H                                             | 0.149435  | -5.558189 | 3.767796  |
| H  | -2.911630 | 2.726842  | 4.128707  | C                                             | 1.516038  | -5.012711 | 7.340697  |
| H  | -1.884950 | 1.330829  | 4.448816  | H                                             | 2.815023  | -3.541905 | 6.474493  |
| H  | -1.377961 | 2.580971  | 3.288507  | C                                             | 0.489013  | -5.933240 | 7.127439  |
| 66 |           |           |           | H                                             | -0.801949 | -6.825033 | 5.648803  |

|                                              |           |           |           |    |           |           |          |
|----------------------------------------------|-----------|-----------|-----------|----|-----------|-----------|----------|
| H                                            | 1.899698  | -4.849814 | 8.345247  | H  | -1.975455 | -0.542718 | 1.419272 |
| H                                            | 0.074899  | -6.499498 | 7.957429  | H  | -1.070628 | 3.443804  | 1.308528 |
| Si                                           | 4.890614  | -0.468368 | -0.109585 | Ni | 0.711558  | -0.033039 | 1.387985 |
| C                                            | 5.759304  | 1.252105  | -0.106780 | C  | 0.496730  | -1.707063 | 2.224217 |
| C                                            | 6.355155  | -1.668170 | 0.186962  | C  | -0.276459 | -1.828339 | 3.393070 |
| C                                            | 4.215661  | -0.667763 | -1.897268 | C  | 0.818579  | -2.905941 | 1.558323 |
| H                                            | 5.033510  | 2.049315  | -0.309821 | C  | -0.704571 | -3.066884 | 3.867310 |
| H                                            | 6.437561  | 1.258308  | -0.974483 | H  | -0.555491 | -0.932991 | 3.945303 |
| C                                            | 6.547873  | 1.571425  | 1.164851  | C  | 0.390482  | -4.144734 | 2.023572 |
| H                                            | 6.695785  | -1.536194 | 1.224967  | H  | 1.441050  | -2.867501 | 0.665628 |
| H                                            | 5.950306  | -2.681194 | 0.124009  | C  | -0.378075 | -4.252246 | 3.193683 |
| C                                            | 7.544204  | -1.491756 | -0.763476 | H  | -1.322712 | -3.114518 | 4.761711 |
| H                                            | 4.067013  | 0.347445  | -2.294358 | H  | 0.686349  | -5.048864 | 1.495180 |
| H                                            | 4.998525  | -1.123858 | -2.521224 | C  | -0.821822 | -5.568819 | 3.700321 |
| C                                            | 2.915956  | -1.468585 | -2.021807 | C  | -1.250714 | -6.574522 | 2.820151 |
| H                                            | 7.353789  | 0.845008  | 1.325542  | C  | -0.825794 | -5.848843 | 5.075735 |
| H                                            | 7.007658  | 2.568546  | 1.134463  | C  | -1.667040 | -7.814813 | 3.296815 |
| H                                            | 5.904240  | 1.533335  | 2.051968  | H  | -1.280257 | -6.369032 | 1.752903 |
| H                                            | 8.006449  | -0.502042 | -0.663835 | C  | -1.245702 | -7.087300 | 5.553970 |
| H                                            | 8.332101  | -2.235041 | -0.576150 | H  | -0.469683 | -5.093823 | 5.772235 |
| H                                            | 7.241197  | -1.601295 | -1.812558 | C  | -1.667753 | -8.077268 | 4.666692 |
| H                                            | 2.579054  | -1.556688 | -3.064655 | H  | -2.001721 | -8.576019 | 2.596106 |
| H                                            | 3.039573  | -2.469798 | -1.600555 | H  | -1.232655 | -7.283704 | 6.623389 |
| H                                            | 2.112930  | -0.986063 | -1.447689 | H  | -1.993671 | -9.044962 | 5.039442 |
| 64                                           |           |           |           | Si | 2.541333  | -0.216488 | 2.736648 |
| J, E( $\omega$ B97XD/BSII) = -1472.774876 au |           |           |           | C  | 2.099826  | 0.279782  | 4.528921 |
| C                                            | -0.898097 | 2.370838  | 1.486496  | C  | 3.497512  | -1.864242 | 2.894852 |
| C                                            | -1.897576 | 1.537605  | 0.658795  | C  | 3.867129  | 1.029381  | 2.109380 |
| H                                            | -1.102968 | 2.206578  | 2.551598  | H  | 3.047685  | 0.454046  | 5.058527 |
| H                                            | -2.893097 | 1.649860  | 1.103648  | H  | 1.646720  | -0.602075 | 5.000471 |
| H                                            | -1.974748 | 1.927534  | -0.359080 | C  | 1.181595  | 1.490053  | 4.702803 |
| C                                            | 0.489473  | 1.443690  | -1.257799 | H  | 2.833610  | -2.593815 | 3.372941 |
| H                                            | 1.228342  | 1.652558  | -2.039892 | H  | 3.694640  | -2.263717 | 1.890135 |
| H                                            | -0.302065 | 2.186749  | -1.387983 | C  | 4.806828  | -1.760610 | 3.686859 |
| C                                            | -0.060848 | 0.021390  | -1.478179 | H  | 3.421090  | 2.020048  | 1.947678 |
| H                                            | -0.713957 | 0.004507  | -2.363927 | H  | 4.592263  | 1.166008  | 2.925277 |
| H                                            | 0.780406  | -0.644499 | -1.709517 | C  | 4.601419  | 0.565074  | 0.845952 |
| C                                            | 1.154080  | 1.618609  | 0.092141  | H  | 0.228823  | 1.336949  | 4.180356 |
| H                                            | 2.240615  | 1.628253  | 0.072292  | H  | 0.952175  | 1.689247  | 5.757896 |
| C                                            | 0.556851  | 2.046588  | 1.257064  | H  | 1.633200  | 2.402744  | 4.293273 |
| H                                            | 1.214381  | 2.402338  | 2.049310  | H  | 4.629730  | -1.404841 | 4.709198 |
| C                                            | -0.770925 | -0.564990 | -0.286694 | H  | 5.305246  | -2.735770 | 3.766455 |
| H                                            | -0.715255 | -1.649034 | -0.202873 | H  | 5.520752  | -1.069486 | 3.223213 |
| C                                            | -1.532597 | 0.076013  | 0.639391  | H  | 5.298802  | 1.323406  | 0.466423 |

|                                 |           |           |           |                                              |           |           |           |
|---------------------------------|-----------|-----------|-----------|----------------------------------------------|-----------|-----------|-----------|
| H                               | 5.180802  | -0.345464 | 1.036485  | C                                            | 4.466700  | -1.441089 | 4.072498  |
| H                               | 3.902430  | 0.323427  | 0.033821  | H                                            | 5.031001  | -1.926099 | 3.267204  |
| 64                              |           |           |           | H                                            | 4.846482  | -0.418290 | 4.167086  |
| TSJ/K, E( $\omega$ B97XD/BSII)= |           |           |           | H                                            | 4.719645  | -1.966881 | 5.002864  |
| -1472.760923 au                 |           |           |           | C                                            | 0.355972  | -1.471085 | 2.646425  |
| C                               | -1.953305 | -1.458524 | -0.637892 | C                                            | -0.285355 | -0.942869 | 3.788568  |
| C                               | -0.927947 | -0.956195 | -1.678975 | C                                            | 0.213879  | -2.863065 | 2.425585  |
| H                               | -1.753426 | -2.518801 | -0.435689 | C                                            | -1.073942 | -1.733596 | 4.612028  |
| H                               | -0.823518 | -1.722970 | -2.455862 | H                                            | -0.186723 | 0.118427  | 4.008926  |
| H                               | -1.306469 | -0.065863 | -2.189207 | C                                            | -0.599192 | -3.648656 | 3.235363  |
| C                               | -1.393483 | 1.634356  | -0.131412 | H                                            | 0.750092  | -3.334092 | 1.602591  |
| H                               | -1.781779 | 2.585279  | 0.252692  | C                                            | -1.263987 | -3.101268 | 4.344204  |
| H                               | -1.987282 | 1.406861  | -1.020619 | H                                            | -1.589564 | -1.281340 | 5.456668  |
| C                               | 0.092171  | 1.832808  | -0.509707 | H                                            | -0.686404 | -4.714399 | 3.035089  |
| H                               | 0.156373  | 2.417197  | -1.441303 | C                                            | -2.122970 | -3.936473 | 5.208980  |
| H                               | 0.569247  | 2.444950  | 0.265896  | C                                            | -2.942821 | -4.935194 | 4.659709  |
| C                               | -1.599678 | 0.565042  | 0.914874  | C                                            | -2.146824 | -3.753107 | 6.600678  |
| H                               | -1.632004 | 0.904123  | 1.950798  | C                                            | -3.755184 | -5.722360 | 5.471116  |
| C                               | -1.896155 | -0.746941 | 0.689289  | H                                            | -2.960913 | -5.075036 | 3.581629  |
| H                               | -2.170117 | -1.349604 | 1.554129  | C                                            | -2.961757 | -4.537521 | 7.412509  |
| C                               | 0.895306  | 0.558980  | -0.625276 | H                                            | -1.497619 | -3.006297 | 7.050799  |
| H                               | 1.975523  | 0.704969  | -0.576470 | C                                            | -3.769589 | -5.526784 | 6.852135  |
| C                               | 0.440597  | -0.670619 | -1.085368 | H                                            | -4.387475 | -6.484389 | 5.021987  |
| H                               | 1.202850  | -1.422567 | -1.302784 | H                                            | -2.957574 | -4.382445 | 8.488676  |
| H                               | -2.966593 | -1.415597 | -1.066189 | H                                            | -4.404739 | -6.140022 | 7.486124  |
| Ni                              | 0.337715  | -0.627286 | 0.944678  | 64                                           |           |           |           |
| Si                              | 2.314370  | -0.656977 | 2.198960  | K, E( $\omega$ B97XD/BSII) = -1472.793604 au |           |           |           |
| C                               | 3.593763  | -1.205368 | 0.869460  | C                                            | -2.048425 | 0.272894  | 0.911986  |
| H                               | 3.959022  | -2.202777 | 1.152470  | C                                            | -1.411655 | 0.057277  | -0.483035 |
| H                               | 3.098038  | -1.330893 | -0.099437 | H                                            | -2.267928 | -0.709417 | 1.347804  |
| C                               | 4.776589  | -0.239575 | 0.716128  | H                                            | -1.960209 | -0.744957 | -0.989560 |
| H                               | 5.499382  | -0.599178 | -0.028521 | H                                            | -1.536753 | 0.949745  | -1.102929 |
| H                               | 4.441016  | 0.752761  | 0.390482  | C                                            | -0.076286 | 2.706599  | 0.294407  |
| H                               | 5.317746  | -0.103064 | 1.658944  | H                                            | 0.169188  | 3.763049  | 0.455966  |
| C                               | 2.289173  | 1.243561  | 2.452976  | H                                            | -1.005861 | 2.701195  | -0.282130 |
| H                               | 2.445347  | 1.710739  | 1.473140  | C                                            | 1.066695  | 2.055971  | -0.518551 |
| H                               | 1.261703  | 1.515203  | 2.737178  | H                                            | 1.000208  | 2.370916  | -1.571916 |
| C                               | 3.275850  | 1.833459  | 3.466690  | H                                            | 2.023343  | 2.440657  | -0.145216 |
| H                               | 4.313825  | 1.666762  | 3.157688  | C                                            | -0.290417 | 2.034601  | 1.633733  |
| H                               | 3.138636  | 2.917479  | 3.576966  | H                                            | 0.139426  | 2.545061  | 2.493903  |
| H                               | 3.152737  | 1.384400  | 4.458620  | C                                            | -1.169862 | 1.003663  | 1.900571  |
| C                               | 2.956920  | -1.480818 | 3.811130  | H                                            | -1.387341 | 0.784071  | 2.946557  |
| H                               | 2.412469  | -1.034570 | 4.654833  | C                                            | 1.120616  | 0.550170  | -0.416414 |
| H                               | 2.622352  | -2.527083 | 3.781761  | H                                            | 2.110695  | 0.112861  | -0.564215 |



|    |           |           |           |                                              |           |           |           |
|----|-----------|-----------|-----------|----------------------------------------------|-----------|-----------|-----------|
| C  | 0.051171  | -0.319723 | -0.399975 | H                                            | 0.907769  | 3.129897  | 6.003854  |
| H  | 0.271828  | -1.380455 | -0.504705 | H                                            | 1.482753  | 3.263088  | 4.338832  |
| H  | -3.015663 | 0.787203  | 0.796384  | H                                            | 0.257849  | 2.059577  | 4.754261  |
| Ni | 0.656357  | 0.128344  | 1.584395  | 66                                           |           |           |           |
| C  | -0.495222 | -2.757496 | 2.840722  | L, E( $\omega$ B97XD/BSII) = -2172.608488 au |           |           |           |
| C  | 0.599311  | -2.565362 | 2.017397  | K                                            | -4.935076 | -0.131021 | -4.595457 |
| C  | 1.547648  | -1.521404 | 2.241708  | C                                            | -1.374513 | 2.771546  | -0.463628 |
| C  | 1.343470  | -0.618354 | 3.356870  | C                                            | 0.112572  | 3.042141  | -0.451891 |
| C  | 0.274455  | -0.939264 | 4.264466  | C                                            | -1.386420 | 3.261984  | 2.831537  |
| C  | -0.618610 | -1.948292 | 4.013854  | C                                            | 0.846189  | 3.349891  | 0.855026  |
| H  | 2.523074  | -1.605708 | 1.756084  | C                                            | -0.690091 | 4.529807  | 2.432035  |
| H  | -1.410882 | -2.166715 | 4.725533  | C                                            | 0.310621  | 4.569118  | 1.547039  |
| H  | 0.165954  | -0.357109 | 5.177499  | H                                            | 0.265219  | 3.874666  | -1.159236 |
| H  | 0.727761  | -3.200948 | 1.143839  | H                                            | 0.762410  | 2.457257  | 1.478798  |
| C  | -1.524316 | -3.768026 | 2.518933  | H                                            | -0.716907 | 2.400097  | 2.790871  |
| C  | -1.186856 | -5.014190 | 1.967097  | H                                            | -1.062562 | 5.462772  | 2.858326  |
| C  | -2.883222 | -3.491805 | 2.742043  | H                                            | -1.720502 | 2.769883  | -1.500443 |
| C  | -2.170443 | -5.943186 | 1.639837  | H                                            | 0.591093  | 2.166677  | -0.917380 |
| H  | -0.139051 | -5.263292 | 1.818816  | H                                            | -1.761334 | 3.348543  | 3.860485  |
| C  | -3.867987 | -4.421300 | 2.416543  | H                                            | 1.908002  | 3.492428  | 0.612148  |
| H  | -3.167605 | -2.526857 | 3.154851  | H                                            | 0.737582  | 5.533377  | 1.266298  |
| C  | -3.516778 | -5.651600 | 1.861998  | C                                            | -2.402593 | 2.732670  | 0.445896  |
| H  | -1.883790 | -6.904666 | 1.220559  | H                                            | -3.387114 | 2.704483  | -0.026438 |
| H  | -4.913961 | -4.180530 | 2.590914  | C                                            | -2.580688 | 2.932480  | 1.933200  |
| H  | -4.284253 | -6.378488 | 1.608846  | H                                            | -3.340718 | 3.725425  | 2.034456  |
| Si | 2.785063  | 0.458811  | 3.917680  | H                                            | -3.055711 | 2.015612  | 2.314453  |
| C  | 4.201092  | -0.692924 | 4.436278  | Si                                           | -3.154980 | 0.152357  | -1.643730 |
| C  | 3.369794  | 1.564736  | 2.491309  | C                                            | -2.172595 | -0.571921 | -3.152132 |
| C  | 2.277452  | 1.527023  | 5.398368  | C                                            | -4.512655 | -1.142982 | -1.166693 |
| H  | 5.043480  | -0.087865 | 4.800951  | C                                            | -4.130350 | 1.713856  | -2.384642 |
| H  | 4.566022  | -1.206491 | 3.534796  | H                                            | -2.732555 | -1.008619 | -4.003623 |
| C  | 3.789083  | -1.725910 | 5.492166  | H                                            | -1.642894 | -1.436236 | -2.734735 |
| H  | 3.541213  | 0.927271  | 1.611555  | C                                            | -1.147867 | 0.441151  | -3.676502 |
| H  | 2.535209  | 2.222921  | 2.214614  | H                                            | -3.934270 | -1.898815 | -0.623769 |
| C  | 4.620454  | 2.396577  | 2.799458  | H                                            | -5.148241 | -0.673073 | -0.403016 |
| H  | 1.973597  | 0.863233  | 6.219734  | C                                            | -5.404920 | -1.886592 | -2.166993 |
| H  | 3.179427  | 2.042417  | 5.758482  | H                                            | -3.580971 | 2.595387  | -2.036178 |
| C  | 1.172065  | 2.548794  | 5.111306  | H                                            | -4.058937 | 1.848932  | -3.482361 |
| H  | 2.949475  | -2.336747 | 5.139581  | C                                            | -5.581508 | 1.868744  | -1.909018 |
| H  | 4.613692  | -2.404871 | 5.743545  | H                                            | -0.509159 | 0.776838  | -2.850553 |
| H  | 3.470632  | -1.241985 | 6.423835  | H                                            | -0.496312 | 0.025558  | -4.456590 |
| H  | 5.479388  | 1.757920  | 3.037584  | H                                            | -1.624966 | 1.344083  | -4.086083 |
| H  | 4.909329  | 3.029886  | 1.951105  | H                                            | -4.816429 | -2.352152 | -2.974827 |
| H  | 4.458166  | 3.058553  | 3.659266  | H                                            | -5.951020 | -2.711373 | -1.691531 |

|                                              |           |           |           |    |           |           |           |
|----------------------------------------------|-----------|-----------|-----------|----|-----------|-----------|-----------|
| H                                            | -6.190893 | -1.245823 | -2.603644 | C  | -3.402905 | 0.904517  | -1.358738 |
| H                                            | -6.041808 | 2.811474  | -2.234763 | C  | -2.169639 | -1.943917 | -1.375859 |
| H                                            | -6.241811 | 1.049037  | -2.233716 | H  | -1.800900 | -2.316604 | 0.731799  |
| H                                            | -5.620584 | 1.850196  | -0.813902 | C  | -2.912705 | 0.995770  | 0.093994  |
| Ni                                           | -1.740611 | 0.675026  | 0.024973  | H  | -2.282796 | -0.265041 | 1.744204  |
| C                                            | -1.441652 | -1.175107 | 0.076873  | H  | -5.693656 | -1.742639 | -1.655233 |
| F                                            | -0.543742 | 0.795605  | 1.425572  | C  | -3.617124 | -2.384211 | -1.625990 |
| C                                            | -0.372339 | -1.758880 | -0.622947 | H  | -3.684700 | 1.913427  | -1.684434 |
| C                                            | -2.114545 | -2.001554 | 0.992866  | H  | -2.571606 | 0.607547  | -2.004387 |
| C                                            | -0.019531 | -3.095956 | -0.451850 | H  | -1.877571 | -1.199167 | -2.120947 |
| H                                            | 0.217721  | -1.144791 | -1.301898 | H  | -1.513098 | -2.805687 | -1.557491 |
| C                                            | -1.768010 | -3.338510 | 1.172527  | H  | -2.254473 | 1.872173  | 0.187140  |
| C                                            | -0.718818 | -3.919008 | 0.443368  | H  | -3.781622 | 1.211438  | 0.735196  |
| H                                            | 0.834557  | -3.500875 | -0.992488 | H  | -3.881362 | -3.160828 | -0.890794 |
| H                                            | -2.930674 | -1.586101 | 1.581759  | H  | -3.669523 | -2.889655 | -2.604140 |
| H                                            | -2.334933 | -3.951347 | 1.871571  | K  | 0.500761  | -1.158189 | 2.757978  |
| C                                            | -0.360083 | -5.342699 | 0.616216  | C  | 2.331816  | -1.770110 | 0.534921  |
| C                                            | 0.024135  | -6.131470 | -0.480401 | C  | 1.554193  | -1.314564 | -0.557982 |
| C                                            | -0.392958 | -5.951606 | 1.881355  | H  | 1.155727  | -2.052924 | -1.253880 |
| C                                            | 0.363420  | -7.472530 | -0.320145 | C  | 2.265102  | -3.151354 | 1.008712  |
| H                                            | 0.034460  | -5.686965 | -1.472763 | C  | 3.263488  | -3.716445 | 1.836273  |
| C                                            | -0.060601 | -7.294132 | 2.042654  | C  | 1.136137  | -3.962887 | 0.731480  |
| H                                            | -0.656209 | -5.352730 | 2.749525  | C  | 3.137749  | -5.002062 | 2.353770  |
| C                                            | 0.320626  | -8.062972 | 0.942832  | H  | 4.168693  | -3.150046 | 2.040125  |
| H                                            | 0.653404  | -8.061958 | -1.187237 | C  | 1.022825  | -5.253221 | 1.241490  |
| H                                            | -0.086789 | -7.738791 | 3.034923  | H  | 0.332426  | -3.556659 | 0.121163  |
| H                                            | 0.583744  | -9.110290 | 1.069148  | C  | 2.017904  | -5.784906 | 2.063765  |
| H                                            | -5.237108 | -4.652191 | -3.438433 | H  | 3.934361  | -5.405222 | 2.975581  |
| 66                                           |           |           |           | H  | 0.141853  | -5.845167 | 1.001252  |
| M, E( $\omega$ B97XD/BSII) = -2172.587599 au |           |           |           | H  | 1.927376  | -6.791179 | 2.463638  |
| H                                            | 3.588039  | -1.046456 | 2.153260  | Si | 1.286513  | 2.785099  | -0.008808 |
| H                                            | 1.067941  | 0.301371  | -1.888464 | C  | 0.086458  | 2.984687  | -1.461180 |
| H                                            | 3.371095  | 1.296898  | 1.676041  | C  | 0.305125  | 2.718164  | 1.621720  |
| Ni                                           | -0.359535 | -0.312229 | 0.005189  | C  | 2.499116  | 4.237758  | 0.027995  |
| C                                            | 1.397982  | 0.055116  | -0.875844 | H  | -0.588834 | 3.829349  | -1.264340 |
| C                                            | 2.204496  | 1.114986  | -0.195536 | H  | -0.552291 | 2.088473  | -1.477936 |
| C                                            | 2.842968  | 0.589479  | 1.040650  | C  | 0.777692  | 3.162279  | -2.819701 |
| C                                            | 2.992331  | -0.754071 | 1.285231  | H  | -0.326263 | 1.814672  | 1.583770  |
| F                                            | 3.309413  | 1.488944  | -1.131806 | H  | 1.028175  | 2.548596  | 2.434827  |
| C                                            | -4.605600 | 0.005625  | -1.506229 | C  | -0.558854 | 3.947080  | 1.920636  |
| C                                            | -1.896029 | -1.469242 | 0.038334  | H  | 2.866723  | 4.380913  | -0.995880 |
| C                                            | -2.194484 | -0.222958 | 0.648625  | H  | 1.937720  | 5.149140  | 0.281911  |
| C                                            | -4.685469 | -1.328145 | -1.588437 | C  | 3.693443  | 4.061847  | 0.972406  |
| H                                            | -5.558775 | 0.536604  | -1.489162 | H  | 1.522064  | 2.377716  | -2.996052 |

|                                              |           |           |           |                                               |           |           |           |
|----------------------------------------------|-----------|-----------|-----------|-----------------------------------------------|-----------|-----------|-----------|
| H                                            | 0.058212  | 3.141437  | -3.648185 | C                                             | 2.845746  | -6.327684 | 3.120943  |
| H                                            | 1.308249  | 4.120369  | -2.870899 | H                                             | 3.060240  | -4.603961 | 4.385858  |
| H                                            | -1.311308 | 4.104152  | 1.138391  | C                                             | 1.347998  | -6.090219 | 1.253423  |
| H                                            | -1.096672 | 3.854631  | 2.873530  | H                                             | 0.470674  | -4.146660 | 0.995682  |
| H                                            | 0.047655  | 4.859231  | 1.975805  | C                                             | 2.224473  | -6.878758 | 2.001347  |
| H                                            | 4.340455  | 4.948384  | 0.981299  | H                                             | 3.524157  | -6.931365 | 3.719342  |
| H                                            | 3.374317  | 3.883472  | 2.008121  | H                                             | 0.863198  | -6.501038 | 0.370523  |
| H                                            | 4.299946  | 3.208013  | 0.653035  | H                                             | 2.420738  | -7.908336 | 1.713480  |
| 66                                           |           |           |           | F                                             | 0.301415  | -0.418959 | 5.597846  |
| N, E( $\omega$ B97XD/BSII) = -2172.589391 au |           |           |           | K                                             | -0.546529 | 0.366275  | 0.485585  |
| C                                            | 2.948390  | -0.047043 | -2.235775 | Si                                            | 0.847522  | 1.780731  | 4.324234  |
| C                                            | 1.973287  | 0.135295  | -1.046829 | C                                             | 2.311352  | 2.412692  | 5.344204  |
| H                                            | 3.978667  | 0.012704  | -1.857350 | C                                             | 0.925725  | 2.532487  | 2.570344  |
| H                                            | 1.634792  | 1.185970  | -1.046664 | C                                             | -0.766500 | 2.368148  | 5.126313  |
| H                                            | 1.095712  | -0.484325 | -1.284054 | H                                             | 2.269806  | 3.511208  | 5.361391  |
| C                                            | 2.131980  | -2.981415 | -1.145182 | H                                             | 3.240035  | 2.161566  | 4.811664  |
| H                                            | 1.970558  | -4.064873 | -1.166266 | C                                             | 2.355324  | 1.866766  | 6.778411  |
| H                                            | 1.205577  | -2.562671 | -0.720542 | H                                             | 1.533172  | 1.858756  | 1.950010  |
| C                                            | 3.278962  | -2.685519 | -0.161333 | H                                             | -0.105537 | 2.516565  | 2.172993  |
| H                                            | 3.335813  | -3.519935 | 0.548610  | C                                             | 1.458947  | 3.967255  | 2.497808  |
| H                                            | 4.227115  | -2.700733 | -0.723205 | H                                             | -0.681702 | 2.199800  | 6.206556  |
| C                                            | 2.364325  | -2.524145 | -2.566247 | H                                             | -0.832428 | 3.457835  | 4.986270  |
| H                                            | 2.253645  | -3.302233 | -3.322720 | C                                             | -2.039392 | 1.686666  | 4.614908  |
| C                                            | 2.747524  | -1.321232 | -3.015973 | H                                             | 2.315950  | 0.772921  | 6.793808  |
| H                                            | 2.925750  | -1.233687 | -4.088674 | H                                             | 3.263306  | 2.187380  | 7.304658  |
| C                                            | 3.195854  | -1.417040 | 0.659525  | H                                             | 1.496360  | 2.220687  | 7.360314  |
| H                                            | 4.078023  | -1.317214 | 1.303191  | H                                             | 2.497156  | 4.015207  | 2.844384  |
| C                                            | 2.560967  | -0.174086 | 0.327175  | H                                             | 1.437652  | 4.367136  | 1.475202  |
| H                                            | 3.089626  | 0.706057  | 0.712551  | H                                             | 0.874202  | 4.649201  | 3.127798  |
| H                                            | 2.838889  | 0.793261  | -2.934332 | H                                             | -2.943578 | 2.100626  | 5.079458  |
| Ni                                           | 1.690269  | -1.138259 | 1.813345  | H                                             | -2.160434 | 1.805259  | 3.526852  |
| C                                            | 0.080390  | -0.772697 | 3.187812  | H                                             | -2.003895 | 0.615764  | 4.838630  |
| C                                            | 2.266079  | -0.712584 | 4.209157  | 66                                            |           |           |           |
| H                                            | 3.095152  | -0.167921 | 4.650109  | TSN/O, E( $\omega$ B97XD/BSII) = -2172.583428 |           |           |           |
| C                                            | 0.245988  | -2.149593 | 2.869075  | au                                            |           |           |           |
| H                                            | -0.566869 | -2.705289 | 2.404616  | H                                             | 3.842201  | -1.305512 | 1.881371  |
| C                                            | 1.477858  | -2.795526 | 3.120642  | H                                             | 1.038311  | 0.256846  | -1.876127 |
| C                                            | 0.904644  | -0.125782 | 4.238142  | H                                             | 3.356753  | 1.067364  | 1.683006  |
| H                                            | -0.923206 | -0.364921 | 3.046547  | Ni                                            | -0.493708 | -0.475474 | -0.061597 |
| C                                            | 2.486363  | -1.996012 | 3.762840  | C                                             | 1.475016  | -0.081715 | -0.935622 |
| H                                            | 3.494820  | -2.400910 | 3.808150  | C                                             | 2.062526  | 0.921660  | -0.067053 |
| C                                            | 1.725139  | -4.198216 | 2.742819  | C                                             | 2.878413  | 0.379984  | 0.989490  |
| C                                            | 2.593829  | -5.007996 | 3.491072  | C                                             | 3.175773  | -0.971753 | 1.083348  |
| C                                            | 1.108140  | -4.769737 | 1.616763  | F                                             | 3.121794  | 1.859024  | -1.230550 |

|    |           |           |           |                                              |           |           |           |
|----|-----------|-----------|-----------|----------------------------------------------|-----------|-----------|-----------|
| C  | -4.733922 | -0.173449 | -1.659479 | C                                            | -0.715810 | 3.810201  | 1.763351  |
| C  | -2.055939 | -1.601684 | 0.007524  | H                                            | 2.860329  | 4.474683  | -0.703246 |
| C  | -2.336838 | -0.305356 | 0.528857  | H                                            | 1.948934  | 4.943454  | 0.732569  |
| C  | -4.849132 | -1.507027 | -1.638668 | C                                            | 3.755092  | 3.805302  | 1.138597  |
| H  | -5.673302 | 0.380320  | -1.699647 | H                                            | 1.621040  | 2.314072  | -3.063505 |
| C  | -3.512051 | 0.706251  | -1.558344 | H                                            | 0.188427  | 3.178074  | -3.691048 |
| C  | -2.351864 | -2.174318 | -1.368544 | H                                            | 1.493611  | 4.050707  | -2.871983 |
| H  | -1.995113 | -2.398028 | 0.763379  | H                                            | -1.406902 | 3.963710  | 0.925550  |
| C  | -3.037778 | 0.883639  | -0.108568 | H                                            | -1.327729 | 3.701342  | 2.669766  |
| H  | -2.418885 | -0.269436 | 1.624324  | H                                            | -0.134453 | 4.733749  | 1.874221  |
| H  | -5.867500 | -1.898387 | -1.688749 | H                                            | 4.400508  | 4.683237  | 1.273561  |
| C  | -3.811730 | -2.592331 | -1.578674 | H                                            | 3.472970  | 3.457702  | 2.142767  |
| H  | -3.767710 | 1.696360  | -1.954886 | H                                            | 4.341510  | 3.019595  | 0.652837  |
| H  | -2.679264 | 0.349212  | -2.171294 | 66                                           |           |           |           |
| H  | -2.046282 | -1.494434 | -2.168387 | O, E( $\omega$ B97XD/BSII) = -2172.622871 au |           |           |           |
| H  | -1.719029 | -3.064224 | -1.488057 | H                                            | 3.259491  | -1.115459 | 1.875188  |
| H  | -2.367240 | 1.754236  | -0.059857 | H                                            | 0.852806  | 0.342686  | -2.188267 |
| H  | -3.909346 | 1.147189  | 0.509996  | H                                            | 2.943771  | 1.286749  | 1.421586  |
| H  | -4.097337 | -3.292847 | -0.777726 | Ni                                           | -0.517764 | -0.268120 | -0.186236 |
| H  | -3.880253 | -3.180815 | -2.508190 | C                                            | 1.174079  | 0.033093  | -1.193505 |
| K  | 0.650619  | -1.195422 | 2.641750  | C                                            | 1.679448  | 1.032431  | -0.305155 |
| C  | 2.569237  | -1.942864 | 0.254296  | C                                            | 2.449328  | 0.562833  | 0.774051  |
| C  | 1.754031  | -1.453750 | -0.785551 | C                                            | 2.633015  | -0.805205 | 1.039128  |
| H  | 1.352110  | -2.149671 | -1.519360 | F                                            | 1.946011  | 2.574512  | -2.249157 |
| C  | 2.660082  | -3.381658 | 0.552650  | C                                            | -4.821481 | 0.091618  | -1.580181 |
| C  | 3.827128  | -3.966454 | 1.076946  | C                                            | -2.068207 | -1.388219 | -0.104887 |
| C  | 1.531249  | -4.209364 | 0.382034  | C                                            | -2.352276 | -0.147677 | 0.521422  |
| C  | 3.864174  | -5.316779 | 1.414200  | C                                            | -4.895832 | -1.241605 | -1.675408 |
| H  | 4.721889  | -3.358691 | 1.187872  | H                                            | -5.777865 | 0.616029  | -1.549944 |
| C  | 1.573947  | -5.562450 | 0.711042  | C                                            | -3.623828 | 0.997488  | -1.432767 |
| H  | 0.609878  | -3.772773 | -0.001543 | C                                            | -2.372673 | -1.844591 | -1.518764 |
| C  | 2.739474  | -6.124028 | 1.233622  | H                                            | -1.936428 | -2.232448 | 0.583207  |
| H  | 4.783352  | -5.746236 | 1.805731  | C                                            | -3.115428 | 1.063817  | 0.014298  |
| H  | 0.689666  | -6.178980 | 0.565601  | H                                            | -2.423999 | -0.224095 | 1.617310  |
| H  | 2.773591  | -7.179122 | 1.491784  | H                                            | -5.902001 | -1.661498 | -1.736836 |
| Si | 1.360846  | 2.665442  | -0.024381 | C                                            | -3.823337 | -2.292137 | -1.736954 |
| C  | 0.219043  | 2.927004  | -1.513891 | H                                            | -3.915250 | 2.010884  | -1.732176 |
| C  | 0.192522  | 2.603770  | 1.514647  | H                                            | -2.799399 | 0.725512  | -2.097245 |
| C  | 2.527445  | 4.124337  | 0.280550  | H                                            | -2.108235 | -1.086753 | -2.261117 |
| H  | -0.427563 | 3.788239  | -1.291442 | H                                            | -1.715345 | -2.699167 | -1.728310 |
| H  | -0.461201 | 2.059340  | -1.551080 | H                                            | -2.484253 | 1.954862  | 0.122221  |
| C  | 0.911092  | 3.121771  | -2.866213 | H                                            | -3.981720 | 1.225981  | 0.674483  |
| H  | -0.429129 | 1.694834  | 1.417858  | H                                            | -4.066495 | -3.073428 | -0.999506 |
| H  | 0.836616  | 2.434695  | 2.396110  | H                                            | -3.891248 | -2.793984 | -2.715691 |

|                                              |           |           |           |    |           |           |           |
|----------------------------------------------|-----------|-----------|-----------|----|-----------|-----------|-----------|
| K                                            | 0.083875  | 0.249472  | 2.740518  | H  | -0.357326 | 1.553483  | 1.425321  |
| C                                            | 1.972172  | -1.776471 | 0.278354  | H  | -0.652838 | 1.468834  | -3.516676 |
| C                                            | 1.237939  | -1.341430 | -0.856208 | Ni | -0.742301 | -0.551194 | 0.054413  |
| H                                            | 0.889512  | -2.090118 | -1.565372 | F  | 2.751604  | 2.141100  | -0.906974 |
| C                                            | 2.004708  | -3.206440 | 0.642613  | C  | -2.732282 | -0.776194 | -0.453473 |
| C                                            | 3.155778  | -3.809841 | 1.172244  | C  | -0.371385 | -2.671267 | 0.106354  |
| C                                            | 0.853020  | -3.994186 | 0.480122  | C  | -0.312226 | -2.215887 | -1.189712 |
| C                                            | 3.153112  | -5.155288 | 1.531365  | C  | -2.591552 | -1.009895 | 0.903729  |
| H                                            | 4.068046  | -3.226841 | 1.271418  | H  | -3.016449 | 0.231041  | -0.757076 |
| C                                            | 0.851547  | -5.339617 | 0.838016  | C  | -2.826325 | -1.829376 | -1.539163 |
| H                                            | -0.048640 | -3.530425 | 0.088280  | C  | -1.552373 | -3.343329 | 0.775250  |
| C                                            | 2.001382  | -5.925884 | 1.367658  | H  | 0.574146  | -2.746770 | 0.640432  |
| H                                            | 4.058567  | -5.607545 | 1.928206  | C  | -1.453248 | -2.152253 | -2.174949 |
| H                                            | -0.051576 | -5.930947 | 0.707673  | H  | -2.808119 | -0.176449 | 1.574469  |
| H                                            | 2.002068  | -6.976455 | 1.645980  | C  | -2.437157 | -2.356548 | 1.569466  |
| Si                                           | 1.243166  | 2.893927  | -0.688084 | H  | -3.494355 | -1.466094 | -2.329173 |
| C                                            | -0.480785 | 3.177751  | -1.497813 | H  | -3.290571 | -2.738523 | -1.146317 |
| C                                            | 0.398825  | 2.966972  | 1.209154  | H  | -2.148599 | -3.877566 | 0.030033  |
| C                                            | 2.446781  | 4.345042  | -0.341254 | H  | -1.176373 | -4.109515 | 1.463518  |
| H                                            | -1.188828 | 3.628295  | -0.790274 | H  | -1.522619 | -3.086021 | -2.754870 |
| H                                            | -0.865796 | 2.158041  | -1.681415 | H  | -1.211555 | -1.356336 | -2.889911 |
| C                                            | -0.497392 | 3.959462  | -2.812896 | H  | -1.976778 | -2.186302 | 2.549969  |
| H                                            | -0.459694 | 2.266894  | 1.142287  | H  | -3.418903 | -2.815628 | 1.766553  |
| H                                            | 1.103661  | 2.559563  | 1.960102  | H  | 0.675051  | -2.013373 | -1.602467 |
| C                                            | -0.093515 | 4.327819  | 1.704541  | K  | 1.094076  | 3.834506  | -1.069340 |
| H                                            | 2.937656  | 4.610487  | -1.283621 | C  | -1.448677 | 2.254183  | -0.297155 |
| H                                            | 1.857322  | 5.221077  | -0.036532 | C  | -1.503559 | 2.268215  | -1.682141 |
| C                                            | 3.509570  | 4.055378  | 0.724218  | H  | -2.247243 | 2.873446  | -2.196876 |
| H                                            | 0.173028  | 3.498487  | -3.542874 | C  | -2.389801 | 3.045189  | 0.520530  |
| H                                            | -1.505006 | 4.017455  | -3.249716 | C  | -3.730834 | 3.206212  | 0.131600  |
| H                                            | -0.147644 | 4.988698  | -2.660192 | C  | -1.974790 | 3.664650  | 1.713250  |
| H                                            | -0.671202 | 4.848301  | 0.929971  | C  | -4.614929 | 3.964898  | 0.893559  |
| H                                            | -0.733185 | 4.281567  | 2.601015  | H  | -4.085796 | 2.704101  | -0.764763 |
| H                                            | 0.754627  | 4.977509  | 1.952232  | C  | -2.858885 | 4.423128  | 2.476386  |
| H                                            | 4.175275  | 4.913311  | 0.892762  | H  | -0.944205 | 3.555623  | 2.044859  |
| H                                            | 3.056168  | 3.809410  | 1.694296  | C  | -4.183981 | 4.579903  | 2.069575  |
| H                                            | 4.145061  | 3.208745  | 0.433231  | H  | -5.649750 | 4.064384  | 0.574951  |
| 66                                           |           |           |           | H  | -2.510365 | 4.894101  | 3.392413  |
| P, E( $\omega$ B97XD/BSII) = -2172.652862 au |           |           |           | H  | -4.875782 | 5.167384  | 2.667351  |
| C                                            | -0.576724 | 1.493545  | -2.431666 | Si | 2.424697  | 0.772438  | 0.460071  |
| C                                            | 0.460822  | 0.824869  | -1.798393 | C  | 3.963869  | -0.070735 | -0.317351 |
| C                                            | 0.652248  | 0.819574  | -0.372973 | C  | 2.691752  | 2.225270  | 1.715980  |
| C                                            | -0.461228 | 1.418993  | 0.348849  | C  | 2.090067  | -0.669071 | 1.757104  |
| H                                            | 1.202692  | 0.326839  | -2.415035 | H  | 4.286340  | -0.912281 | 0.310051  |

|                                              |           |           |           |    |           |           |           |
|----------------------------------------------|-----------|-----------|-----------|----|-----------|-----------|-----------|
| H                                            | 4.773856  | 0.670406  | -0.298464 | H  | -2.352687 | 0.360788  | -1.639047 |
| C                                            | 3.775548  | -0.550309 | -1.759929 | C  | -1.997563 | 2.480327  | -1.891346 |
| H                                            | 3.286157  | 2.988339  | 1.198003  | H  | -2.473959 | 2.669108  | -2.866252 |
| H                                            | 1.705142  | 2.682074  | 1.916005  | H  | -2.791516 | 2.581714  | -1.147431 |
| C                                            | 3.362830  | 1.902689  | 3.054009  | C  | 1.459133  | -1.749823 | -0.965073 |
| H                                            | 2.093076  | -1.604976 | 1.176319  | C  | 1.728978  | -0.341904 | -1.116986 |
| H                                            | 2.985363  | -0.739720 | 2.394203  | H  | 2.090036  | 0.013238  | -2.077438 |
| C                                            | 0.847424  | -0.642468 | 2.644227  | C  | 3.062746  | 0.429195  | 2.366174  |
| H                                            | 3.512021  | 0.295457  | -2.403145 | H  | 3.236699  | -0.203316 | 3.241120  |
| H                                            | 4.684037  | -1.015787 | -2.167109 | H  | 4.017552  | 0.839279  | 2.014546  |
| H                                            | 2.973232  | -1.298182 | -1.836013 | F  | 2.337851  | 1.576675  | 2.835821  |
| H                                            | 4.335054  | 1.418248  | 2.899933  | Si | -1.520668 | 0.264453  | 1.118934  |
| H                                            | 3.542453  | 2.809074  | 3.649599  | C  | -3.245837 | 1.153364  | 1.083192  |
| H                                            | 2.761054  | 1.224845  | 3.667581  | C  | -1.919128 | -1.592560 | 0.783255  |
| H                                            | 0.802422  | -1.475736 | 3.361249  | C  | -1.308132 | 0.305652  | 3.070278  |
| H                                            | 0.764967  | 0.290352  | 3.218428  | H  | -3.929785 | 0.587510  | 1.732252  |
| H                                            | -0.080360 | -0.710783 | 2.045294  | H  | -3.677215 | 1.091380  | 0.075633  |
| 69                                           |           |           |           | C  | -3.241950 | 2.613339  | 1.550586  |
| R, E( $\omega$ B97XD/BSII) = -2211.895805 au |           |           |           | H  | -2.081226 | -1.696826 | -0.299434 |
| Ni                                           | 0.005075  | 0.513268  | -0.619358 | H  | -0.989854 | -2.141194 | 0.986063  |
| K                                            | 0.356401  | 2.794033  | 1.639956  | C  | -3.085072 | -2.217268 | 1.554194  |
| H                                            | 1.377250  | -3.413355 | 0.371636  | H  | -1.172035 | 1.332580  | 3.457727  |
| C                                            | 1.583256  | -2.350690 | 0.273732  | H  | -2.302214 | 0.022697  | 3.449793  |
| C                                            | 1.971969  | 0.414663  | 0.082966  | C  | -0.255661 | -0.602460 | 3.709399  |
| C                                            | 2.330797  | -0.287626 | 1.290400  | H  | -2.566034 | 3.234228  | 0.941258  |
| C                                            | 2.093255  | -1.635494 | 1.387004  | H  | -4.231385 | 3.086832  | 1.485913  |
| H                                            | 2.426382  | 1.403175  | -0.048146 | H  | -2.923963 | 2.696808  | 2.599623  |
| H                                            | 2.315197  | -2.169000 | 2.308372  | H  | -4.035629 | -1.723297 | 1.319910  |
| C                                            | -0.488371 | 0.456034  | -2.608689 | H  | -3.208816 | -3.284295 | 1.320395  |
| C                                            | 0.414911  | 1.071602  | -3.663054 | H  | -2.938107 | -2.139975 | 2.638898  |
| C                                            | -0.949170 | 3.591035  | -1.642739 | H  | -0.376588 | -0.670710 | 4.800023  |
| C                                            | 1.251605  | 2.320708  | -3.288714 | H  | -0.310397 | -1.619902 | 3.305674  |
| C                                            | -0.386424 | 4.187303  | -2.899270 | H  | 0.753836  | -0.237075 | 3.511645  |
| C                                            | 0.580902  | 3.621331  | -3.626925 | C  | 1.061347  | -2.541944 | -2.148561 |
| H                                            | -0.185050 | 1.307509  | -4.556121 | C  | 1.730442  | -2.409765 | -3.374134 |
| H                                            | 1.475303  | 2.269428  | -2.213787 | C  | -0.027166 | -3.423540 | -2.073943 |
| H                                            | -0.139048 | 3.139035  | -1.048643 | C  | 1.325215  | -3.137433 | -4.489973 |
| H                                            | -0.852723 | 5.104120  | -3.260455 | H  | 2.586420  | -1.743625 | -3.447054 |
| H                                            | -0.624916 | -0.612303 | -2.795721 | C  | -0.435378 | -4.147972 | -3.191321 |
| H                                            | 1.104484  | 0.280104  | -3.982101 | H  | -0.574134 | -3.505778 | -1.138797 |
| H                                            | -1.402990 | 4.387318  | -1.036160 | C  | 0.237882  | -4.007364 | -4.404731 |
| H                                            | 2.215109  | 2.273206  | -3.811091 | H  | 1.861673  | -3.026066 | -5.429160 |
| H                                            | 0.876959  | 4.097737  | -4.561828 | H  | -1.290142 | -4.815769 | -3.116183 |
| C                                            | -1.521980 | 1.037820  | -1.855093 | H  | -0.083330 | -4.569140 | -5.278077 |

|                                              |           |           |           |                                                  |           |           |           |
|----------------------------------------------|-----------|-----------|-----------|--------------------------------------------------|-----------|-----------|-----------|
| 69                                           |           |           |           | H                                                | 3.223905  | 2.642126  | -0.874807 |
| S, E( $\omega$ B97XD/BSII) = -2211.898406 au |           |           |           | K                                                | -1.801337 | -2.073558 | -1.115396 |
| C                                            | -1.959197 | 1.967570  | -0.345048 | C                                                | -0.239541 | -2.438252 | 2.359961  |
| C                                            | -3.143458 | 2.797218  | 0.187159  | F                                                | -1.150961 | -2.835192 | 1.337604  |
| H                                            | -3.310429 | 3.650259  | -0.491943 | H                                                | 0.204709  | -3.379131 | 2.709054  |
| H                                            | -4.051248 | 2.180391  | 0.089953  | H                                                | -0.841855 | -2.002666 | 3.163618  |
| C                                            | -0.134978 | 1.845235  | 2.308863  | C                                                | 0.796110  | -1.472373 | 1.866212  |
| C                                            | -0.600286 | 3.298454  | 2.068092  | C                                                | 1.490402  | -0.723038 | 2.875120  |
| H                                            | 0.023721  | 3.954409  | 2.689534  | C                                                | 1.497479  | -1.734288 | 0.637605  |
| H                                            | -0.388700 | 3.585307  | 1.035218  | C                                                | 2.732543  | -0.195091 | 2.657219  |
| C                                            | -0.998921 | 0.734494  | 1.739588  | H                                                | 0.993043  | -0.553002 | 3.828786  |
| H                                            | -1.417149 | 0.072968  | 2.497949  | C                                                | 2.841826  | -1.263279 | 0.498872  |
| C                                            | -1.670491 | 0.744791  | 0.496071  | H                                                | 1.222352  | -2.610751 | 0.057532  |
| H                                            | -2.534011 | 0.056482  | 0.480998  | C                                                | 3.443633  | -0.462938 | 1.440870  |
| C                                            | -2.047917 | 3.529403  | 2.398284  | H                                                | 3.215239  | 0.390408  | 3.435220  |
| H                                            | -2.253372 | 3.886382  | 3.408618  | H                                                | 3.378959  | -1.514886 | -0.410118 |
| C                                            | -3.101895 | 3.304164  | 1.605822  | C                                                | 4.776028  | 0.128048  | 1.202119  |
| H                                            | -4.086197 | 3.527118  | 2.022293  | C                                                | 5.796140  | -0.592491 | 0.561461  |
| Ni                                           | 0.037394  | -0.301333 | 0.353429  | C                                                | 5.045079  | 1.450729  | 1.588130  |
| H                                            | 0.898919  | 1.760502  | 1.942878  | C                                                | 7.034691  | -0.010084 | 0.307302  |
| H                                            | -0.063802 | 1.683051  | 3.391486  | H                                                | 5.618588  | -1.627930 | 0.281047  |
| H                                            | -2.224150 | 1.652381  | -1.358856 | C                                                | 6.284673  | 2.033361  | 1.337371  |
| H                                            | -1.061313 | 2.576483  | -0.460786 | H                                                | 4.259125  | 2.035579  | 2.059352  |
| Si                                           | 0.653052  | -0.069201 | -1.901092 | C                                                | 7.286292  | 1.306390  | 0.694561  |
| C                                            | 0.976339  | -1.592403 | -3.094844 | H                                                | 7.810930  | -0.590490 | -0.185949 |
| H                                            | 0.032471  | -1.815764 | -3.627316 | H                                                | 6.465012  | 3.063345  | 1.636105  |
| H                                            | 1.633580  | -1.201062 | -3.885010 | H                                                | 8.254152  | 1.760616  | 0.498017  |
| C                                            | 1.573918  | -2.903313 | -2.579174 | 69                                               |           |           |           |
| H                                            | 1.770610  | -3.617825 | -3.390765 | TSS/T, E( $\omega$ B97XD/BSII) = -2211.873337 au |           |           |           |
| H                                            | 2.522833  | -2.738004 | -2.057882 | C                                                | 0.919431  | 1.742180  | 0.397083  |
| H                                            | 0.914441  | -3.417549 | -1.863754 | C                                                | -0.233684 | 2.626197  | 0.903362  |
| C                                            | -0.427066 | 0.986726  | -3.132459 | H                                                | -0.481049 | 3.361244  | 0.119424  |
| H                                            | -1.470406 | 0.625061  | -3.132824 | H                                                | -1.131720 | 1.994567  | 0.992003  |
| H                                            | -0.482441 | 1.999806  | -2.712933 | C                                                | 2.784278  | 1.777923  | 3.062243  |
| C                                            | 0.055195  | 1.082249  | -4.585044 | C                                                | 2.455826  | 3.213368  | 2.616518  |
| H                                            | 0.011665  | 0.113579  | -5.097266 | H                                                | 3.139774  | 3.887494  | 3.147998  |
| H                                            | -0.550623 | 1.785941  | -5.173316 | H                                                | 2.691665  | 3.335435  | 1.557344  |
| H                                            | 1.094343  | 1.427886  | -4.641806 | C                                                | 1.916375  | 0.664032  | 2.527255  |
| C                                            | 2.305289  | 0.918914  | -1.886191 | H                                                | 1.639001  | -0.092438 | 3.255960  |
| H                                            | 3.149695  | 0.252007  | -1.676928 | C                                                | 1.218597  | 0.603165  | 1.336744  |
| H                                            | 2.485881  | 1.323653  | -2.892641 | H                                                | 0.465961  | -0.190111 | 1.331769  |
| C                                            | 2.297165  | 2.053621  | -0.857814 | C                                                | 1.036987  | 3.617177  | 2.918113  |
| H                                            | 1.458604  | 2.743489  | -1.024430 | H                                                | 0.897852  | 4.157511  | 3.855527  |
| H                                            | 2.184220  | 1.646451  | 0.153962  | C                                                | -0.066743 | 3.355958  | 2.208653  |

|    |           |           |           |                                              |           |           |           |
|----|-----------|-----------|-----------|----------------------------------------------|-----------|-----------|-----------|
| H  | -1.007268 | 3.731651  | 2.616201  | C                                            | 8.804234  | -0.612135 | 1.385473  |
| Ni | 3.013776  | -0.599369 | 1.223396  | C                                            | 7.994651  | 1.434519  | 2.360055  |
| H  | 3.837100  | 1.570684  | 2.823670  | C                                            | 10.024071 | 0.000063  | 1.111975  |
| H  | 2.730812  | 1.732941  | 4.158283  | H                                            | 8.657495  | -1.660055 | 1.135657  |
| H  | 0.605733  | 1.335679  | -0.568724 | C                                            | 9.215323  | 2.047188  | 2.089017  |
| H  | 1.808219  | 2.337434  | 0.189520  | H                                            | 7.194449  | 2.009338  | 2.819354  |
| Si | 3.675416  | -0.280732 | -0.970774 | C                                            | 10.236669 | 1.333597  | 1.462489  |
| C  | 4.023765  | -1.824690 | -2.121247 | H                                            | 10.816713 | -0.570296 | 0.633474  |
| H  | 3.081297  | -2.055174 | -2.651316 | H                                            | 9.365720  | 3.089422  | 2.360389  |
| H  | 4.675381  | -1.427766 | -2.913560 | H                                            | 11.190297 | 1.810886  | 1.251872  |
| C  | 4.628251  | -3.133609 | -1.611873 | 69                                           |           |           |           |
| H  | 4.821910  | -3.839622 | -2.431313 | W, E( $\omega$ B97XD/BSII) = -2211.879847 au |           |           |           |
| H  | 5.580224  | -2.970780 | -1.096199 | C                                            | -3.968833 | 0.748908  | -0.900611 |
| H  | 3.970981  | -3.651016 | -0.898903 | C                                            | -5.363816 | 1.311976  | -0.562407 |
| C  | 2.546987  | 0.695426  | -2.222110 | H                                            | -5.883745 | 1.558285  | -1.502354 |
| H  | 1.515826  | 0.303722  | -2.204973 | H                                            | -5.960087 | 0.507132  | -0.107775 |
| H  | 2.465282  | 1.722729  | -1.847097 | C                                            | -2.052266 | 2.682513  | 0.802150  |
| C  | 3.020644  | 0.748698  | -3.680754 | C                                            | -3.110370 | 3.532827  | 0.063681  |
| H  | 2.990585  | -0.235608 | -4.162245 | H                                            | -2.782603 | 4.579449  | 0.108173  |
| H  | 2.396363  | 1.422259  | -4.284172 | H                                            | -3.118187 | 3.274397  | -0.996851 |
| H  | 4.052201  | 1.112209  | -3.757722 | C                                            | -2.416257 | 1.244966  | 1.083535  |
| C  | 5.273704  | 0.784594  | -0.985013 | H                                            | -2.114497 | 0.884633  | 2.065422  |
| H  | 6.156052  | 0.172644  | -0.769360 | C                                            | -3.194973 | 0.403601  | 0.339978  |
| H  | 5.421628  | 1.176968  | -2.001464 | H                                            | -3.465211 | -0.549229 | 0.796120  |
| C  | 5.205509  | 1.938360  | 0.018282  | C                                            | -4.497639 | 3.424164  | 0.639936  |
| H  | 4.345926  | 2.593156  | -0.178553 | H                                            | -4.762277 | 4.183966  | 1.376851  |
| H  | 5.088928  | 1.546841  | 1.035239  | C                                            | -5.426393 | 2.498925  | 0.366912  |
| H  | 6.109875  | 2.560045  | 0.002565  | H                                            | -6.381690 | 2.600832  | 0.885239  |
| K  | 1.063424  | -2.369308 | -0.297147 | Ni                                           | -1.021861 | -0.265495 | -0.086560 |
| C  | 2.805660  | -2.515970 | 3.126641  | H                                            | -1.112615 | 2.710091  | 0.231490  |
| F  | 1.096488  | -2.267260 | 2.095584  | H                                            | -1.831655 | 3.159579  | 1.766220  |
| H  | 2.720977  | -3.502127 | 2.689091  | H                                            | -4.093544 | -0.158726 | -1.503215 |
| H  | 2.303008  | -2.373776 | 4.077310  | H                                            | -3.408018 | 1.441347  | -1.523310 |
| C  | 3.895234  | -1.706992 | 2.789164  | Si                                           | -0.354454 | 0.444752  | -2.169290 |
| C  | 4.510015  | -0.794775 | 3.728564  | C                                            | -0.309244 | -0.836817 | -3.612908 |
| C  | 4.533058  | -1.873833 | 1.484230  | H                                            | -1.342087 | -1.161525 | -3.808755 |
| C  | 5.719261  | -0.229105 | 3.472742  | H                                            | 0.024468  | -0.323114 | -4.527421 |
| H  | 4.001756  | -0.606642 | 4.672119  | C                                            | 0.573707  | -2.064827 | -3.380908 |
| C  | 5.876651  | -1.363729 | 1.339352  | H                                            | 0.574601  | -2.753723 | -4.238261 |
| H  | 4.324028  | -2.810541 | 0.969094  | H                                            | 1.617279  | -1.775111 | -3.198784 |
| C  | 6.448185  | -0.528012 | 2.258248  | H                                            | 0.234238  | -2.633523 | -2.506628 |
| H  | 6.185997  | 0.406261  | 4.220758  | C                                            | -1.273778 | 1.944811  | -2.984813 |
| H  | 6.420330  | -1.610879 | 0.432832  | H                                            | -2.253717 | 1.585283  | -3.333057 |
| C  | 7.763752  | 0.094835  | 2.008619  | H                                            | -1.488519 | 2.685680  | -2.202324 |



|                                               |           |           |           |    |           |           |           |
|-----------------------------------------------|-----------|-----------|-----------|----|-----------|-----------|-----------|
| C                                             | -0.553250 | 2.645449  | -4.141825 | C  | 2.334773  | 2.443152  | 2.159257  |
| H                                             | -0.287165 | 1.941359  | -4.939952 | C  | 1.421640  | 3.568291  | 1.626416  |
| H                                             | -1.168249 | 3.435270  | -4.597526 | H  | 1.917210  | 4.523823  | 1.842318  |
| H                                             | 0.378316  | 3.115126  | -3.803810 | H  | 1.358358  | 3.514319  | 0.536967  |
| C                                             | 1.461833  | 1.083333  | -2.028792 | C  | 1.763021  | 1.043983  | 2.161962  |
| H                                             | 2.130781  | 0.249061  | -1.783752 | H  | 1.959310  | 0.481066  | 3.077018  |
| H                                             | 1.799825  | 1.461655  | -3.004691 | C  | 0.809037  | 0.510137  | 1.337463  |
| C                                             | 1.612196  | 2.166730  | -0.958612 | H  | 0.363936  | -0.427314 | 1.666763  |
| H                                             | 0.991303  | 3.044342  | -1.187568 | C  | 0.043076  | 3.584128  | 2.234997  |
| H                                             | 1.281071  | 1.783016  | 0.016934  | H  | -0.076364 | 4.241334  | 3.097692  |
| H                                             | 2.648522  | 2.515658  | -0.846497 | C  | -1.035198 | 2.881642  | 1.864324  |
| K                                             | 1.833959  | -3.130972 | 2.525312  | H  | -1.945414 | 3.051016  | 2.442626  |
| C                                             | -1.617491 | -2.279941 | 2.045402  | Ni | 2.888123  | -0.566477 | 1.234752  |
| F                                             | -2.521597 | -2.683023 | 1.060210  | H  | 3.277969  | 2.455660  | 1.601483  |
| H                                             | -1.279183 | -3.231644 | 2.510591  | H  | 2.607049  | 2.679759  | 3.196252  |
| H                                             | -2.170639 | -1.722082 | 2.814681  | H  | -0.222437 | 0.446682  | -0.526966 |
| C                                             | -0.510568 | -1.438611 | 1.491854  | H  | 0.689236  | 1.917855  | -0.300048 |
| C                                             | 0.219332  | -0.599920 | 2.392594  | Si | 3.955386  | 0.242107  | -0.585955 |
| C                                             | 0.169346  | -1.765835 | 0.214254  | C  | 4.030415  | -1.099894 | -1.970963 |
| C                                             | 1.529425  | -0.210713 | 2.168756  | H  | 3.030453  | -1.552034 | -2.040466 |
| H                                             | -0.280094 | -0.255991 | 3.300543  | H  | 4.186009  | -0.567806 | -2.921929 |
| C                                             | 1.582967  | -1.493575 | 0.109503  | C  | 5.082634  | -2.202365 | -1.844152 |
| H                                             | -0.216622 | -2.607147 | -0.366755 | H  | 5.079747  | -2.880362 | -2.709308 |
| C                                             | 2.259397  | -0.701788 | 1.019109  | H  | 6.094323  | -1.782443 | -1.767641 |
| H                                             | 2.016937  | 0.462016  | 2.868763  | H  | 4.910732  | -2.819406 | -0.953978 |
| H                                             | 2.093387  | -1.842440 | -0.785038 | C  | 2.973339  | 1.654170  | -1.461344 |
| C                                             | 3.681966  | -0.354450 | 0.827341  | H  | 2.038396  | 1.211292  | -1.829645 |
| C                                             | 4.183232  | 0.895320  | 1.230300  | H  | 2.681037  | 2.397352  | -0.709907 |
| C                                             | 4.585831  | -1.258322 | 0.239685  | C  | 3.685345  | 2.372748  | -2.612849 |
| C                                             | 5.524145  | 1.224796  | 1.052644  | H  | 4.064557  | 1.670128  | -3.365467 |
| H                                             | 3.500962  | 1.631454  | 1.645025  | H  | 3.015068  | 3.072009  | -3.132318 |
| C                                             | 5.925776  | -0.927886 | 0.056041  | H  | 4.542649  | 2.954020  | -2.253614 |
| H                                             | 4.229745  | -2.234074 | -0.087301 | C  | 5.720563  | 0.995517  | -0.478506 |
| C                                             | 6.405598  | 0.315583  | 0.467439  | H  | 6.477950  | 0.242170  | -0.243363 |
| H                                             | 5.879194  | 2.205540  | 1.359955  | H  | 5.974404  | 1.358040  | -1.485398 |
| H                                             | 6.598661  | -1.646616 | -0.406010 | C  | 5.823689  | 2.141697  | 0.529089  |
| H                                             | 7.451602  | 0.575076  | 0.327471  | H  | 5.143248  | 2.964309  | 0.270241  |
| 69                                            |           |           |           | H  | 5.550881  | 1.794919  | 1.534254  |
| TSW/X, E( $\omega$ B97XD/BSII) = -2211.850452 |           |           |           | H  | 6.838184  | 2.558269  | 0.586583  |
| au                                            |           |           |           | K  | 6.470049  | -3.211869 | 3.913856  |
| C                                             | 0.072223  | 1.192852  | 0.222205  | C  | 2.863375  | -2.666977 | 3.459823  |
| C                                             | -1.204777 | 1.870053  | 0.758636  | F  | 1.637285  | -1.838886 | 2.428583  |
| H                                             | -1.740439 | 2.339158  | -0.082744 | H  | 2.678788  | -3.613831 | 2.959699  |
| H                                             | -1.882384 | 1.087398  | 1.130339  | H  | 2.427943  | -2.576188 | 4.453520  |

|                                              |           |           |           |    |           |           |           |
|----------------------------------------------|-----------|-----------|-----------|----|-----------|-----------|-----------|
| C                                            | 3.997800  | -1.921495 | 3.135916  | Si | -0.394471 | 0.347952  | -2.803368 |
| C                                            | 4.563893  | -0.923142 | 3.994217  | C  | -1.151045 | -0.790149 | -4.131590 |
| C                                            | 4.386841  | -1.828004 | 1.692911  | H  | -1.953749 | -1.361099 | -3.647025 |
| C                                            | 5.738290  | -0.290207 | 3.665843  | H  | -1.634987 | -0.158004 | -4.890639 |
| H                                            | 4.091468  | -0.724909 | 4.958242  | C  | -0.162564 | -1.756289 | -4.791940 |
| C                                            | 5.780423  | -1.438615 | 1.524549  | H  | -0.655925 | -2.391828 | -5.539837 |
| H                                            | 4.100093  | -2.706575 | 1.099731  | H  | 0.647005  | -1.218663 | -5.301252 |
| C                                            | 6.446111  | -0.665129 | 2.447644  | H  | 0.290491  | -2.405266 | -4.037314 |
| H                                            | 6.186086  | 0.419940  | 4.354966  | C  | -1.048929 | 2.105351  | -3.201646 |
| H                                            | 6.275697  | -1.697574 | 0.593139  | H  | -2.140965 | 2.059790  | -3.311777 |
| C                                            | 7.836256  | -0.215465 | 2.218583  | H  | -0.847681 | 2.798223  | -2.378827 |
| C                                            | 8.298000  | 1.013584  | 2.721329  | C  | -0.427610 | 2.662150  | -4.491596 |
| C                                            | 8.751068  | -1.000822 | 1.491831  | H  | -0.558576 | 1.976886  | -5.338666 |
| C                                            | 9.606127  | 1.437965  | 2.503249  | H  | -0.880155 | 3.621477  | -4.776401 |
| H                                            | 7.609614  | 1.665022  | 3.251307  | H  | 0.648997  | 2.830950  | -4.373332 |
| C                                            | 10.057415 | -0.575397 | 1.268045  | C  | 1.503599  | 0.437513  | -2.874461 |
| H                                            | 8.429505  | -1.959416 | 1.088270  | H  | 1.868997  | -0.586480 | -2.745214 |
| C                                            | 10.496473 | 0.646721  | 1.777840  | H  | 1.813510  | 0.765841  | -3.877505 |
| H                                            | 9.927391  | 2.401044  | 2.892739  | C  | 2.104058  | 1.351124  | -1.800984 |
| H                                            | 10.736836 | -1.204327 | 0.697385  | H  | 1.768410  | 2.389997  | -1.920745 |
| H                                            | 11.517000 | 0.979382  | 1.608000  | H  | 1.808092  | 1.023743  | -0.797171 |
| 69                                           |           |           |           | H  | 3.200650  | 1.356449  | -1.822308 |
| X, E( $\omega$ B97XD/BSII) = -2211.917183 au |           |           |           | K  | 1.456119  | -3.252288 | 3.548911  |
| C                                            | -3.494653 | 0.892460  | -0.744675 | C  | -1.953546 | -2.722484 | 3.116513  |
| C                                            | -4.611113 | 1.545765  | 0.091646  | F  | 0.001060  | -1.783101 | -1.657384 |
| H                                            | -5.376625 | 1.950730  | -0.589637 | H  | -2.389230 | -3.477718 | 2.467258  |
| H                                            | -5.121134 | 0.752802  | 0.657413  | H  | -2.482848 | -2.489040 | 4.036890  |
| C                                            | -0.868699 | 2.466357  | 0.376040  | C  | -0.910226 | -1.933983 | 2.679604  |
| C                                            | -2.009053 | 3.462881  | 0.081849  | C  | -0.321026 | -0.873199 | 3.484485  |
| H                                            | -1.576059 | 4.471878  | 0.081620  | C  | -0.224095 | -2.146651 | 1.414155  |
| H                                            | -2.393346 | 3.308674  | -0.928415 | C  | 0.870869  | -0.263494 | 3.151902  |
| C                                            | -1.273097 | 1.024203  | 0.594493  | H  | -0.834504 | -0.578868 | 4.398709  |
| H                                            | -0.801174 | 0.581776  | 1.470384  | C  | 0.987065  | -1.537142 | 1.118223  |
| C                                            | -2.398055 | 0.347125  | 0.130355  | H  | -0.645491 | -2.850328 | 0.698217  |
| H                                            | -2.699059 | -0.527038 | 0.722915  | C  | 1.610841  | -0.602263 | 1.982774  |
| C                                            | -3.128711 | 3.408913  | 1.086833  | H  | 1.265000  | 0.498021  | 3.823672  |
| H                                            | -3.030016 | 4.091340  | 1.932226  | H  | 1.439476  | -1.760691 | 0.155631  |
| C                                            | -4.204084 | 2.611542  | 1.078725  | C  | 2.864885  | 0.059841  | 1.610632  |
| H                                            | -4.906942 | 2.734469  | 1.904402  | C  | 3.148120  | 1.384158  | 1.999072  |
| Ni                                           | -0.798776 | -0.470462 | -0.737601 | C  | 3.828812  | -0.595043 | 0.817116  |
| H                                            | -0.110106 | 2.538426  | -0.411367 | C  | 4.327388  | 2.015669  | 1.616272  |
| H                                            | -0.359227 | 2.787900  | 1.294063  | H  | 2.410033  | 1.941403  | 2.570343  |
| H                                            | -3.929537 | 0.068801  | -1.325317 | C  | 5.001465  | 0.041065  | 0.423699  |
| H                                            | -3.092632 | 1.593540  | -1.473739 | H  | 3.649310  | -1.619001 | 0.496318  |

|                                              |           |           |           |                                               |           |           |           |
|----------------------------------------------|-----------|-----------|-----------|-----------------------------------------------|-----------|-----------|-----------|
| C                                            | 5.264572  | 1.351965  | 0.823425  | H                                             | -0.018015 | -5.545143 | 0.160283  |
| H                                            | 4.506018  | 3.043999  | 1.922645  | H                                             | -1.623860 | -4.813244 | 0.062235  |
| H                                            | 5.717568  | -0.493098 | -0.196875 | H                                             | -4.295452 | -2.619835 | 0.559575  |
| H                                            | 6.180473  | 1.849880  | 0.516726  | H                                             | -2.683170 | -2.872357 | 1.215742  |
| 69                                           |           |           |           | H                                             | -3.289790 | -1.218949 | 0.875567  |
| Y, E( $\omega$ B97XD/BSII) = -2211.904407 au |           |           |           | Ni                                            | -0.082794 | 0.252101  | -0.610623 |
| K                                            | -0.929059 | -0.715756 | 2.155270  | F                                             | 1.953232  | 0.062410  | -2.634279 |
| C                                            | -1.862012 | 0.996531  | -1.207157 | C                                             | 2.482485  | -0.664398 | -1.562625 |
| C                                            | -2.273845 | 0.795858  | -2.656499 | H                                             | 3.561690  | -0.452755 | -1.552378 |
| C                                            | 0.333899  | 3.232035  | -2.463966 | H                                             | 2.327971  | -1.728842 | -1.771163 |
| C                                            | -1.226749 | 1.015949  | -3.764853 | C                                             | 1.829892  | -0.267194 | -0.263472 |
| C                                            | -0.533115 | 3.420364  | -3.673964 | C                                             | 1.612773  | 1.146065  | -0.002282 |
| C                                            | -1.212874 | 2.432078  | -4.259245 | C                                             | 2.187957  | -1.072671 | 0.887173  |
| H                                            | -3.146450 | 1.438872  | -2.856407 | C                                             | 1.499989  | 1.589920  | 1.345980  |
| H                                            | -0.245200 | 0.715110  | -3.382345 | H                                             | 1.872662  | 1.883979  | -0.757003 |
| H                                            | 0.870603  | 2.279086  | -2.526966 | C                                             | 2.099984  | -0.602159 | 2.166975  |
| H                                            | -0.634974 | 4.436361  | -4.056590 | H                                             | 2.543755  | -2.087232 | 0.720568  |
| H                                            | -2.633698 | 0.576595  | -0.553406 | C                                             | 1.668527  | 0.751359  | 2.435922  |
| H                                            | -2.640637 | -0.231702 | -2.739064 | H                                             | 1.311880  | 2.648503  | 1.515087  |
| H                                            | 1.095734  | 4.021925  | -2.442322 | H                                             | 2.360590  | -1.258508 | 2.994995  |
| H                                            | -1.454393 | 0.339939  | -4.598005 | C                                             | 1.399830  | 1.207473  | 3.813413  |
| H                                            | -1.858369 | 2.662402  | -5.107660 | C                                             | 0.406369  | 2.175885  | 4.071242  |
| C                                            | -1.094822 | 2.013377  | -0.598732 | C                                             | 2.075371  | 0.664917  | 4.923453  |
| H                                            | -1.349586 | 2.166761  | 0.459379  | C                                             | 0.113559  | 2.587951  | 5.368894  |
| C                                            | -0.446032 | 3.279465  | -1.133845 | H                                             | -0.144994 | 2.607638  | 3.237526  |
| H                                            | -1.217497 | 4.063000  | -1.210773 | C                                             | 1.776189  | 1.072108  | 6.220655  |
| H                                            | 0.242531  | 3.626911  | -0.351020 | H                                             | 2.869095  | -0.059948 | 4.764472  |
| Si                                           | -0.789269 | -1.897054 | -1.081393 | C                                             | 0.792953  | 2.034444  | 6.454522  |
| C                                            | -0.318377 | -2.393866 | -2.896304 | H                                             | -0.655328 | 3.339615  | 5.532093  |
| C                                            | 0.005682  | -3.356399 | -0.062190 | H                                             | 2.324747  | 0.642400  | 7.055514  |
| C                                            | -2.678369 | -2.324892 | -0.907462 | H                                             | 0.561994  | 2.350733  | 7.468096  |
| H                                            | 0.444285  | -3.184974 | -2.825253 | 69                                            |           |           |           |
| H                                            | 0.190705  | -1.538519 | -3.352558 | TSY/T, E( $\omega$ B97XD/BSII) = -2211.846694 |           |           |           |
| C                                            | -1.444321 | -2.871854 | -3.817750 | au                                            |           |           |           |
| H                                            | 1.066121  | -3.370553 | -0.350765 | K                                             | -0.518401 | 0.937985  | 2.931733  |
| H                                            | 0.028837  | -3.167559 | 1.025749  | C                                             | -1.040002 | 2.065043  | -1.119416 |
| C                                            | -0.596962 | -4.741566 | -0.316439 | C                                             | -0.521724 | 2.685483  | -2.392036 |
| H                                            | -3.276332 | -1.675783 | -1.557601 | C                                             | -0.181803 | 4.882151  | 0.450434  |
| H                                            | -2.827713 | -3.341027 | -1.295314 | C                                             | 0.226804  | 4.018740  | -2.368048 |
| C                                            | -3.260226 | -2.256936 | 0.506594  | C                                             | -0.863025 | 5.539549  | -0.712030 |
| H                                            | -2.229797 | -2.113685 | -3.925311 | C                                             | -0.661617 | 5.161405  | -1.976168 |
| H                                            | -1.075268 | -3.098806 | -4.827351 | H                                             | -1.380940 | 2.770079  | -3.075446 |
| H                                            | -1.926761 | -3.779589 | -3.435528 | H                                             | 1.086175  | 3.924947  | -1.694714 |
| H                                            | -0.637405 | -4.961842 | -1.390535 | H                                             | 0.811105  | 4.531451  | 0.159771  |

|    |           |           |           |                                              |           |           |           |
|----|-----------|-----------|-----------|----------------------------------------------|-----------|-----------|-----------|
| H  | -1.575010 | 6.334306  | -0.489623 | H                                            | 2.610815  | -0.875653 | 2.068200  |
| H  | -1.699104 | 1.237440  | -1.386514 | C                                            | 2.171424  | 2.368261  | 3.125266  |
| H  | 0.148881  | 1.928865  | -2.827078 | H                                            | 2.165208  | 4.065361  | 1.823785  |
| H  | -0.034824 | 5.613541  | 1.257158  | H                                            | 2.495120  | 0.434653  | 4.114503  |
| H  | 0.638555  | 4.189449  | -3.370566 | C                                            | 1.968452  | 3.134177  | 4.366468  |
| H  | -1.216950 | 5.651335  | -2.776280 | C                                            | 1.208235  | 4.323723  | 4.373799  |
| C  | -1.131733 | 2.409425  | 0.240039  | C                                            | 2.483060  | 2.697133  | 5.604497  |
| H  | -1.903472 | 1.801805  | 0.726895  | C                                            | 0.985741  | 5.038434  | 5.546547  |
| C  | -0.966868 | 3.701526  | 1.028341  | H                                            | 0.778577  | 4.688027  | 3.443931  |
| H  | -1.982601 | 4.057010  | 1.268590  | C                                            | 2.250457  | 3.407646  | 6.778699  |
| H  | -0.502081 | 3.460377  | 1.998617  | H                                            | 3.107864  | 1.808824  | 5.642467  |
| Si | -0.557513 | -0.958945 | -0.019976 | C                                            | 1.499179  | 4.583246  | 6.761959  |
| C  | -0.367614 | -1.889375 | -1.679100 | H                                            | 0.397476  | 5.952634  | 5.511549  |
| C  | 0.114532  | -2.215082 | 1.296060  | H                                            | 2.673591  | 3.046429  | 7.713245  |
| C  | -2.478916 | -0.997252 | 0.256666  | H                                            | 1.320291  | 5.137447  | 7.679299  |
| H  | -0.822161 | -2.886797 | -1.576475 | 69                                           |           |           |           |
| H  | 0.704712  | -2.043045 | -1.854882 | T, E( $\omega$ B97XD/BSII) = -2211.964678 au |           |           |           |
| C  | -0.968323 | -1.159301 | -2.882363 | K                                            | -0.126348 | 1.995884  | 1.426952  |
| H  | 1.163285  | -2.407822 | 1.027783  | C                                            | -1.593886 | 0.296130  | -2.927048 |
| H  | 0.173340  | -1.763952 | 2.301593  | C                                            | -0.682853 | 1.079490  | -3.845916 |
| C  | -0.634711 | -3.549477 | 1.390831  | C                                            | -2.229919 | 3.160305  | -1.312992 |
| H  | -2.964550 | -0.311172 | -0.450369 | C                                            | -0.423560 | 2.571173  | -3.617295 |
| H  | -2.790286 | -2.003723 | -0.059626 | C                                            | -2.487358 | 3.656211  | -2.705997 |
| C  | -3.037161 | -0.737872 | 1.659918  | C                                            | -1.673953 | 3.392924  | -3.732644 |
| H  | -0.442597 | -0.212729 | -3.031744 | H                                            | -1.089947 | 0.937310  | -4.859933 |
| H  | -0.874548 | -1.746469 | -3.805729 | H                                            | 0.046066  | 2.671772  | -2.635848 |
| H  | -2.036978 | -0.946954 | -2.742208 | H                                            | -1.154629 | 3.086250  | -1.135072 |
| H  | -0.645368 | -4.065789 | 0.424532  | H                                            | -3.411758 | 4.208056  | -2.877278 |
| H  | -0.175081 | -4.231654 | 2.119547  | H                                            | -1.818646 | -0.666053 | -3.389804 |
| H  | -1.680734 | -3.409532 | 1.689299  | H                                            | 0.285427  | 0.556752  | -3.848507 |
| H  | -4.098484 | -1.005543 | 1.745201  | H                                            | -2.659551 | 3.863842  | -0.583621 |
| H  | -2.508980 | -1.321440 | 2.429274  | H                                            | 0.305985  | 2.900128  | -4.369300 |
| H  | -2.985595 | 0.328300  | 1.930221  | H                                            | -1.951089 | 3.738399  | -4.729279 |
| Ni | 0.457903  | 1.134467  | -0.118751 | C                                            | -2.400780 | 0.560323  | -1.835562 |
| F  | 1.460436  | 0.674088  | -1.911189 | H                                            | -3.098119 | -0.249192 | -1.633414 |
| C  | 2.653344  | 0.102773  | -0.484850 | C                                            | -2.843126 | 1.779263  | -1.055734 |
| H  | 3.352115  | 0.520545  | -1.198581 | H                                            | -3.931513 | 1.853195  | -1.211425 |
| H  | 2.583006  | -0.980251 | -0.473344 | H                                            | -2.743022 | 1.527022  | 0.015384  |
| C  | 2.362250  | 0.812031  | 0.706370  | Si                                           | -1.225435 | -2.494092 | -1.320939 |
| C  | 2.259739  | 2.261761  | 0.662366  | C                                            | -0.200047 | -3.504108 | -2.589878 |
| C  | 2.437557  | 0.195579  | 2.012098  | C                                            | -1.150971 | -3.474121 | 0.333505  |
| C  | 2.182685  | 2.979585  | 1.870467  | C                                            | -3.057099 | -2.761495 | -1.881717 |
| H  | 2.531931  | 2.779017  | -0.256137 | H                                            | -0.660928 | -4.497157 | -2.694502 |
| C  | 2.379718  | 0.939632  | 3.156728  | H                                            | 0.804477  | -3.676709 | -2.179900 |

|                                              |           |           |           |    |           |           |           |
|----------------------------------------------|-----------|-----------|-----------|----|-----------|-----------|-----------|
| C                                            | -0.079324 | -2.840837 | -3.964679 | C  | -3.248014 | 0.664738  | 1.273507  |
| H                                            | -0.131107 | -3.431841 | 0.735078  | C  | -3.025433 | -0.594081 | 2.129898  |
| H                                            | -1.783501 | -2.952533 | 1.067669  | H  | -3.778406 | -0.638711 | 2.931410  |
| C                                            | -1.576557 | -4.943995 | 0.226965  | H  | -3.199796 | -1.475740 | 1.500492  |
| H                                            | -3.284957 | -2.139162 | -2.758956 | C  | -0.554748 | 2.379588  | 1.782581  |
| H                                            | -3.129231 | -3.798251 | -2.242729 | C  | -1.028671 | 1.730945  | 3.097561  |
| C                                            | -4.117580 | -2.534854 | -0.796771 | H  | -0.469785 | 2.183482  | 3.925031  |
| H                                            | 0.402830  | -1.859036 | -3.879857 | H  | -2.080767 | 1.958182  | 3.283121  |
| H                                            | 0.511000  | -3.441952 | -4.669424 | C  | -0.994864 | 1.691953  | 0.514882  |
| H                                            | -1.064700 | -2.681294 | -4.422519 | H  | -0.446082 | 2.020532  | -0.366108 |
| H                                            | -0.909394 | -5.499869 | -0.442535 | C  | -2.124097 | 0.938576  | 0.297117  |
| H                                            | -1.554712 | -5.449761 | 1.202188  | H  | -2.341338 | 0.677798  | -0.734577 |
| H                                            | -2.592446 | -5.051286 | -0.171209 | C  | -0.790511 | 0.244780  | 3.103514  |
| H                                            | -5.139396 | -2.625399 | -1.189238 | H  | 0.173660  | -0.073150 | 3.498102  |
| H                                            | -4.016565 | -3.261558 | 0.017396  | C  | -1.641576 | -0.731084 | 2.705060  |
| H                                            | -4.033413 | -1.540375 | -0.337800 | H  | -1.313896 | -1.759146 | 2.853691  |
| Ni                                           | -0.534987 | -0.352437 | -1.248537 | Ni | -0.305593 | -0.338150 | 0.685562  |
| F                                            | 0.187661  | 1.428166  | -0.892561 | H  | -0.869428 | 3.434551  | 1.754904  |
| C                                            | 1.136527  | -1.184971 | -0.583738 | H  | 0.543225  | 2.394545  | 1.775060  |
| H                                            | 1.777478  | -0.928857 | -1.439988 | H  | -4.174247 | 0.529290  | 0.703346  |
| H                                            | 1.168186  | -2.269244 | -0.454536 | H  | -3.415835 | 1.537563  | 1.910049  |
| C                                            | 1.602045  | -0.518819 | 0.646732  | Si | 0.488078  | -0.561647 | -1.444169 |
| C                                            | 2.517001  | 0.556552  | 0.615016  | C  | 0.736106  | -2.350978 | -2.093475 |
| C                                            | 1.129703  | -0.896411 | 1.923311  | H  | 0.839924  | -3.044364 | -1.252742 |
| C                                            | 2.904580  | 1.228997  | 1.769239  | H  | -0.200959 | -2.636613 | -2.594688 |
| H                                            | 2.911728  | 0.869882  | -0.346767 | C  | 1.919198  | -2.541795 | -3.051791 |
| C                                            | 1.511471  | -0.221969 | 3.080286  | H  | 1.979168  | -3.575936 | -3.417410 |
| H                                            | 0.421171  | -1.717645 | 1.994953  | H  | 1.847733  | -1.889275 | -3.929421 |
| C                                            | 2.397870  | 0.871710  | 3.034324  | H  | 2.867627  | -2.310357 | -2.554606 |
| H                                            | 3.633506  | 2.033687  | 1.695613  | C  | -0.777107 | 0.208765  | -2.678673 |
| H                                            | 1.091859  | -0.529389 | 4.036308  | H  | -1.738631 | -0.309325 | -2.547922 |
| C                                            | 2.751407  | 1.630241  | 4.253111  | H  | -0.958679 | 1.261215  | -2.418188 |
| C                                            | 2.927117  | 3.023922  | 4.210079  | C  | -0.362553 | 0.121858  | -4.152983 |
| C                                            | 2.902038  | 0.987829  | 5.492788  | H  | -0.237995 | -0.918672 | -4.474010 |
| C                                            | 3.237338  | 3.747283  | 5.359079  | H  | -1.113751 | 0.577318  | -4.812505 |
| H                                            | 2.813140  | 3.549714  | 3.263940  | H  | 0.586967  | 0.637533  | -4.338079 |
| C                                            | 3.206632  | 1.710509  | 6.643086  | C  | 2.116698  | 0.404642  | -1.713443 |
| H                                            | 2.807270  | -0.093570 | 5.546950  | H  | 2.941169  | -0.152414 | -1.259073 |
| C                                            | 3.374562  | 3.094153  | 6.583536  | H  | 2.312632  | 0.396766  | -2.795482 |
| H                                            | 3.366434  | 4.825208  | 5.298267  | C  | 2.132204  | 1.842587  | -1.196077 |
| H                                            | 3.326098  | 1.188144  | 7.589010  | H  | 1.358559  | 2.460283  | -1.671983 |
| H                                            | 3.615078  | 3.656954  | 7.481490  | H  | 1.962963  | 1.864840  | -0.113061 |
| 67                                           |           |           |           | H  | 3.097127  | 2.331606  | -1.384461 |
| U, E( $\omega$ B97XD/BSII) = -1512.076966 au |           |           |           | C  | 0.965432  | -1.743813 | 1.190486  |

|                                               |           |           |           |    |           |           |           |
|-----------------------------------------------|-----------|-----------|-----------|----|-----------|-----------|-----------|
| H                                             | 0.696826  | -2.720802 | 0.770991  | H  | -0.356647 | -2.136603 | -0.992558 |
| H                                             | 0.770411  | -1.806156 | 2.271668  | H  | -2.647233 | 1.408257  | -0.889467 |
| C                                             | 2.414549  | -1.452250 | 0.999855  | Ni | 0.184174  | -0.608213 | 0.913615  |
| C                                             | 2.970623  | -0.267037 | 1.511654  | Si | 2.332841  | -0.705084 | 2.384489  |
| C                                             | 3.274688  | -2.306933 | 0.295875  | C  | 3.264179  | -2.289588 | 1.866179  |
| C                                             | 4.297223  | 0.071306  | 1.291390  | H  | 3.089744  | -3.072978 | 2.618228  |
| H                                             | 2.322323  | 0.412814  | 2.062862  | H  | 2.766234  | -2.637123 | 0.950102  |
| C                                             | 4.606479  | -1.970574 | 0.067573  | C  | 4.767923  | -2.165295 | 1.597476  |
| H                                             | 2.885303  | -3.239253 | -0.105113 | H  | 5.191907  | -3.120595 | 1.261984  |
| C                                             | 5.143346  | -0.768446 | 0.547579  | H  | 4.977063  | -1.427277 | 0.814717  |
| H                                             | 4.693581  | 0.995629  | 1.705120  | H  | 5.320121  | -1.860838 | 2.492740  |
| H                                             | 5.231837  | -2.636123 | -0.522985 | C  | 3.134290  | 0.743868  | 1.422955  |
| C                                             | 6.546536  | -0.390874 | 0.275518  | H  | 3.363606  | 0.349687  | 0.428242  |
| C                                             | 7.575272  | -1.344254 | 0.320108  | H  | 2.407716  | 1.543501  | 1.267826  |
| C                                             | 6.884589  | 0.934159  | -0.040665 | C  | 4.406777  | 1.335539  | 2.044990  |
| C                                             | 8.894952  | -0.986219 | 0.057017  | H  | 5.197449  | 0.588286  | 2.166423  |
| H                                             | 7.337109  | -2.370485 | 0.588732  | H  | 4.810868  | 2.132546  | 1.406605  |
| C                                             | 8.204406  | 1.293963  | -0.300098 | H  | 4.216424  | 1.775982  | 3.029757  |
| H                                             | 6.096799  | 1.680376  | -0.110146 | C  | 2.646294  | -0.271339 | 4.235279  |
| C                                             | 9.216349  | 0.335120  | -0.253200 | H  | 2.582813  | 0.821660  | 4.336357  |
| H                                             | 9.676803  | -1.740419 | 0.104233  | H  | 1.833873  | -0.667059 | 4.858354  |
| H                                             | 8.441959  | 2.324969  | -0.551070 | C  | 3.980381  | -0.761770 | 4.814788  |
| H                                             | 10.246617 | 0.615070  | -0.457541 | H  | 4.073398  | -1.851797 | 4.735098  |
| 67                                            |           |           |           | H  | 4.840143  | -0.323759 | 4.298015  |
| TSU/V, E( $\omega$ B97XD/BSII) = -1512.062401 |           |           |           | H  | 4.074612  | -0.503337 | 5.877649  |
| au                                            |           |           |           | C  | 0.456814  | -1.497737 | 2.818119  |
| C                                             | -2.167149 | 0.527820  | -0.433136 | H  | 1.046948  | -2.202003 | 3.420446  |
| C                                             | -1.391725 | -0.250307 | -1.531510 | H  | -0.088352 | -0.863682 | 3.525383  |
| H                                             | -2.979769 | -0.102846 | -0.060912 | C  | -0.437676 | -2.302672 | 1.934740  |
| H                                             | -2.092221 | -0.928687 | -2.031550 | C  | -0.007627 | -3.509604 | 1.325137  |
| H                                             | -1.045958 | 0.450505  | -2.301013 | C  | -1.780361 | -1.915728 | 1.738635  |
| C                                             | 0.569412  | 1.929518  | -0.657064 | C  | -0.839707 | -4.222430 | 0.488009  |
| H                                             | 1.200177  | 2.806358  | -0.469139 | H  | 0.999363  | -3.866079 | 1.517563  |
| H                                             | -0.227747 | 2.278258  | -1.324586 | C  | -2.618253 | -2.648603 | 0.885669  |
| C                                             | 1.418017  | 0.848808  | -1.386462 | H  | -2.187528 | -1.088412 | 2.309105  |
| H                                             | 1.278280  | 0.964358  | -2.473002 | C  | -2.160938 | -3.786214 | 0.225281  |
| H                                             | 2.478277  | 1.040083  | -1.206773 | H  | -0.484665 | -5.143205 | 0.032462  |
| C                                             | -0.067941 | 1.500151  | 0.655509  | H  | -3.637048 | -2.307393 | 0.721414  |
| H                                             | 0.336636  | 1.949221  | 1.563302  | C  | -3.027516 | -4.524844 | -0.717158 |
| C                                             | -1.325282 | 0.943347  | 0.748087  | C  | -4.390966 | -4.721833 | -0.449875 |
| H                                             | -1.836144 | 1.000435  | 1.708951  | C  | -2.504114 | -5.037916 | -1.914182 |
| C                                             | 1.091787  | -0.570629 | -0.977639 | C  | -5.204009 | -5.404984 | -1.350214 |
| H                                             | 1.918835  | -1.281795 | -0.975756 | H  | -4.808080 | -4.357983 | 0.485818  |
| C                                             | -0.210206 | -1.057265 | -1.022236 | C  | -3.316634 | -5.722144 | -2.814364 |

|                                              |           |           |           |   |           |           |           |
|----------------------------------------------|-----------|-----------|-----------|---|-----------|-----------|-----------|
| H                                            | -1.455735 | -4.872602 | -2.150293 | H | 2.930152  | -0.134911 | 5.333378  |
| C                                            | -4.670693 | -5.908473 | -2.536734 | H | 3.439852  | -1.810687 | 5.391344  |
| H                                            | -6.256029 | -5.553566 | -1.119509 | C | 4.914924  | -0.484458 | 4.523584  |
| H                                            | -2.892418 | -6.103156 | -3.740042 | H | 5.483339  | -1.276731 | 4.022440  |
| H                                            | -5.305319 | -6.442685 | -3.239033 | H | 4.981362  | 0.410975  | 3.894668  |
| 67                                           |           |           |           | H | 5.430050  | -0.260462 | 5.466346  |
| V, E( $\omega$ B97XD/BSII) = -1512.097075 au |           |           |           | C | 0.914939  | -2.274250 | 3.717862  |
| C                                            | -2.153990 | -0.173456 | -1.437906 | H | 1.265552  | -3.188067 | 4.215603  |
| C                                            | -1.084063 | -0.993087 | -2.215432 | H | 0.385407  | -1.685246 | 4.479690  |
| H                                            | -2.958572 | -0.860349 | -1.151619 | C | -0.015144 | -2.623322 | 2.591063  |
| H                                            | -1.607503 | -1.769773 | -2.783484 | C | 0.097174  | -3.855482 | 1.927199  |
| H                                            | -0.587591 | -0.352416 | -2.953282 | C | -1.102031 | -1.768219 | 2.249029  |
| C                                            | 0.511445  | 1.432719  | -1.166271 | C | -0.813110 | -4.257288 | 0.953215  |
| H                                            | 0.990052  | 2.410175  | -1.028365 | H | 0.900679  | -4.530439 | 2.215005  |
| H                                            | -0.034692 | 1.499263  | -2.113422 | C | -2.007123 | -2.181374 | 1.242793  |
| C                                            | 1.610056  | 0.350659  | -1.264647 | H | -1.366184 | -0.942573 | 2.910729  |
| H                                            | 2.063292  | 0.372287  | -2.268940 | C | -1.874584 | -3.420073 | 0.582049  |
| H                                            | 2.414225  | 0.611303  | -0.566529 | H | -0.711965 | -5.236756 | 0.493697  |
| C                                            | -0.469472 | 1.188039  | -0.038489 | H | -2.889295 | -1.578118 | 1.054569  |
| H                                            | -0.332753 | 1.784770  | 0.863974  | C | -2.810908 | -3.787125 | -0.500047 |
| C                                            | -1.667263 | 0.511108  | -0.177413 | C | -4.168629 | -3.431793 | -0.446850 |
| H                                            | -2.429552 | 0.670967  | 0.588214  | C | -2.355397 | -4.473531 | -1.637412 |
| C                                            | 1.138459  | -1.043867 | -0.918239 | C | -5.033240 | -3.739715 | -1.493331 |
| H                                            | 1.910965  | -1.706594 | -0.525156 | H | -4.555704 | -2.928334 | 0.435285  |
| C                                            | -0.035945 | -1.649110 | -1.337639 | C | -3.219538 | -4.783414 | -2.684387 |
| H                                            | -0.096263 | -2.731724 | -1.236221 | H | -1.304708 | -4.740801 | -1.713661 |
| H                                            | -2.609268 | 0.558603  | -2.123834 | C | -4.562777 | -4.414572 | -2.619895 |
| Ni                                           | -0.322945 | -0.878232 | 0.551705  | H | -6.081037 | -3.457771 | -1.425106 |
| Si                                           | 2.448363  | -1.268844 | 3.193678  | H | -2.838629 | -5.305759 | -3.558534 |
| C                                            | 3.430197  | -2.317536 | 1.958449  | H | -5.237108 | -4.652191 | -3.438433 |
| H                                            | 3.956549  | -3.099464 | 2.525867  |   |           |           |           |
| H                                            | 2.688232  | -2.843117 | 1.340970  |   |           |           |           |
| C                                            | 4.417776  | -1.574929 | 1.050119  |   |           |           |           |
| H                                            | 4.951126  | -2.266087 | 0.385250  |   |           |           |           |
| H                                            | 3.900039  | -0.849815 | 0.413240  |   |           |           |           |
| H                                            | 5.171806  | -1.024469 | 1.623825  |   |           |           |           |
| C                                            | 1.777243  | 0.315395  | 2.423684  |   |           |           |           |
| H                                            | 1.300363  | 0.007694  | 1.469640  |   |           |           |           |
| H                                            | 0.942920  | 0.657477  | 3.052598  |   |           |           |           |
| C                                            | 2.736566  | 1.478635  | 2.162893  |   |           |           |           |
| H                                            | 3.597342  | 1.176166  | 1.557211  |   |           |           |           |
| H                                            | 2.234591  | 2.297994  | 1.632310  |   |           |           |           |
| H                                            | 3.128001  | 1.887248  | 3.102378  |   |           |           |           |
| C                                            | 3.459632  | -0.910090 | 4.760280  |   |           |           |           |
